# Supplementary material for: [Retracted] Development of a 5‐Gene Signature to Evaluate Lung Adenocarcinoma Prognosis Based on the Features of Cancer Stem Cells
Source: Hindawi journal article supplement (doi:10.1155/2022/4404406), 2022-01-01
Supplement: f4 [file 4404406.f4.pdf]

**Table S1 Clinical information of samples in different cohorts**

| <b>Clinical Features</b>          | <b>TCGA-LUAD</b> | <b>GSE31210</b> | <b>GSE50081</b> |
|-----------------------------------|------------------|-----------------|-----------------|
| <b>Type</b>                       |                  |                 |                 |
| Normal                            | 59               |                 |                 |
| Tumor                             | 500              | 226             | 129             |
| <b>OS</b>                         |                  |                 |                 |
| 0                                 | 318              | 191             | 76              |
| 1                                 | 182              | 35              | 53              |
| <b>Gender</b>                     |                  |                 |                 |
| Female                            | 270              |                 |                 |
| Male                              | 230              |                 |                 |
| <b>T Stage</b>                    |                  |                 |                 |
| T1                                | 167              |                 |                 |
| T2                                | 267              |                 |                 |
| T3                                | 45               |                 |                 |
| T4                                | 18               |                 |                 |
| TX                                | 3                |                 |                 |
| <b>N Stage</b>                    |                  |                 |                 |
| N0                                | 324              |                 |                 |
| N1                                | 94               |                 |                 |
| N2                                | 69               |                 |                 |
| N3                                | 2                |                 |                 |
| NX                                | 11               |                 |                 |
| <b>M Stage</b>                    |                  |                 |                 |
| M0                                | 332              |                 |                 |
| M1                                | 24               |                 |                 |
| MX                                | 144              |                 |                 |
| <b>Stage</b>                      |                  |                 |                 |
| I                                 | 268              |                 |                 |
| II                                | 119              |                 |                 |
| III                               | 80               |                 |                 |
| IV                                | 25               |                 |                 |
| X                                 | 8                |                 |                 |
| <b>Age</b>                        |                  |                 |                 |
| ≤ 65                              | 237              |                 |                 |
| > 65                              | 253              |                 |                 |
| NA                                | 10               |                 |                 |
| <b>Smoking</b>                    |                  |                 |                 |
| 1                                 | 7                |                 |                 |
| 2                                 | 119              |                 |                 |
| 3                                 | 129              |                 |                 |
| 4                                 | 163              |                 |                 |
| 5                                 | 4                |                 |                 |
| 7                                 | 78               |                 |                 |
| <b>CIMP.methylation.signature</b> |                  |                 |                 |
| high                              | 36               |                 |                 |
| intermediat                       | 64               |                 |                 |
| low                               | 71               |                 |                 |
| NA                                | 329              |                 |                 |
| <b>iCluster.Group</b>             |                  |                 |                 |
| 1                                 | 22               |                 |                 |
| 2                                 | 30               |                 |                 |
| 3                                 | 48               |                 |                 |
| 4                                 | 31               |                 |                 |

|    |     |
|----|-----|
| 5  | 51  |
| 6  | 37  |
| NA | 281 |

---

Note: The OS in the table is the statistical information after filtering. The filtering standard was to remove the sample



es with no living state and living time.
