# Supplementary material for: [Retracted] Development of a 5‐Gene Signature to Evaluate Lung Adenocarcinoma Prognosis Based on the Features of Cancer Stem Cells
Source: Hindawi journal article supplement (doi:10.1155/2022/4404406), 2022-01-01
Supplement: f5 [file 4404406.f5.pdf]

| genes     | p. value | HR       | Low 95%CI | High 95%CI |
|-----------|----------|----------|-----------|------------|
| TIGAR     | 0.26028  | 1.226971 | 0.859347  | 1.751864   |
| PFN2      | 0.045239 | 1.168824 | 1.003313  | 1.361637   |
| RMND5A    | 0.823675 | 1.035424 | 0.762315  | 1.406378   |
| SERTAD2   | 0.416608 | 1.131867 | 0.839456  | 1.526135   |
| PKP2      | 7.82E-06 | 1.333033 | 1.175176  | 1.512093   |
| YWHAB     | 0.101303 | 1.462041 | 0.928206  | 2.3029     |
| TOMM40    | 0.003018 | 1.471389 | 1.139955  | 1.899185   |
| CWC27     | 0.067423 | 1.46542  | 0.972974  | 2.207106   |
| COX17     | 0.22395  | 1.261474 | 0.867549  | 1.834267   |
| PKMYT1    | 0.012887 | 1.288172 | 1.055117  | 1.572704   |
| PSMB6     | 0.010347 | 1.68312  | 1.130497  | 2.505883   |
| FBX045    | 0.000455 | 1.61262  | 1.234549  | 2.106472   |
| AMZ2      | 0.443046 | 1.173066 | 0.780176  | 1.763812   |
| RBM15B    | 0.275904 | 1.259763 | 0.831543  | 1.908504   |
| NCAPG     | 0.00223  | 1.28882  | 1.09537   | 1.516435   |
| NOP2      | 0.029525 | 1.386394 | 1.033024  | 1.860642   |
| GRIP1     | 0.0436   | 1.30277  | 1.007625  | 1.684367   |
| SLC2A1    | 7.09E-05 | 1.337852 | 1.158923  | 1.544406   |
| NME1__NME | 0.702435 | 1.058983 | 0.789224  | 1.420946   |
| CLN6      | 0.118183 | 1.322786 | 0.931302  | 1.878835   |
| TTC5      | 0.81809  | 1.046387 | 0.711025  | 1.539924   |
| LDHA      | 0.000285 | 1.666901 | 1.26484   | 2.196766   |
| DNMT3A    | 0.686501 | 1.057107 | 0.807225  | 1.384342   |
| INTS13    | 0.123861 | 1.260104 | 0.938678  | 1.691594   |
| PES1      | 0.111796 | 1.365498 | 0.930119  | 2.004675   |
| PTCD3     | 0.481827 | 0.860495 | 0.566136  | 1.307903   |
| MSANTD3   | 0.001561 | 1.755892 | 1.238797  | 2.48883    |
| PLOD1     | 0.020796 | 1.472921 | 1.060687  | 2.045369   |
| NCEH1     | 0.048236 | 1.244329 | 1.001697  | 1.545733   |
| SMARCC2   | 0.681905 | 1.064088 | 0.790628  | 1.432131   |
| DROSHA    | 0.929899 | 0.987302 | 0.742676  | 1.312504   |
| CDK8      | 0.067355 | 1.470672 | 0.972824  | 2.223298   |
| MPLKIP    | 0.070558 | 1.51251  | 0.965895  | 2.368464   |
| RMI2      | 0.382087 | 1.102531 | 0.885798  | 1.372292   |
| USP18     | 0.155224 | 1.176578 | 0.940235  | 1.472328   |
| SMARCC1   | 0.814872 | 1.035238 | 0.774719  | 1.383362   |
| RAD54L    | 0.037616 | 1.221122 | 1.011505  | 1.474177   |
| PDRG1     | 0.672857 | 1.086127 | 0.74016   | 1.593805   |
| TTL4      | 0.295634 | 1.187102 | 0.860782  | 1.63713    |
| HMGB2     | 0.135584 | 1.196338 | 0.945391  | 1.513898   |
| UBE2N     | 0.259956 | 1.274981 | 0.835488  | 1.945661   |
| NIF3L1    | 0.076919 | 1.414719 | 0.96321   | 2.077876   |
| VTA1      | 0.029818 | 1.476805 | 1.038878  | 2.099335   |
| DDX21     | 0.04494  | 1.30181  | 1.00597   | 1.684651   |
| SAP30     | 0.407317 | 1.123956 | 0.852532  | 1.481794   |
| MORF4L2   | 0.458397 | 1.146877 | 0.798357  | 1.647542   |
| CCDC90B   | 0.070385 | 1.290424 | 0.97901   | 1.700896   |
| UBE2Z     | 0.206388 | 1.332848 | 0.853548  | 2.081292   |
| RPF2      | 0.045454 | 1.432261 | 1.007294  | 2.036517   |
| ITGB3BP   | 0.540055 | 1.11268  | 0.790759  | 1.565656   |
| SDAD1     | 0.758834 | 1.05955  | 0.732395  | 1.532845   |
| HAUS5     | 0.637724 | 1.07078  | 0.805525  | 1.423382   |
| FCGRT     | 0.007561 | 0.680258 | 0.512736  | 0.902514   |

|         |          |          |          |          |
|---------|----------|----------|----------|----------|
| SZRD1   | 0.732054 | 1.096076 | 0.648307 | 1.853108 |
| GPSM2   | 0.341293 | 1.1299   | 0.878613 | 1.453057 |
| SLC20A1 | 0.019701 | 1.356708 | 1.049871 | 1.753222 |
| TONSL   | 0.07992  | 1.218284 | 0.976731 | 1.519574 |
| TIPIN   | 0.018695 | 1.501582 | 1.070041 | 2.107161 |
| BDH1    | 0.161873 | 1.201222 | 0.929088 | 1.553064 |
| RECQL   | 0.2132   | 1.180418 | 0.909107 | 1.532698 |
| FN3KRP  | 0.286218 | 1.228152 | 0.841825 | 1.791771 |
| ELAC2   | 0.269098 | 1.282809 | 0.824778 | 1.995204 |
| MRPL10  | 0.15836  | 1.382783 | 0.881422 | 2.169321 |
| NCAPH2  | 0.870799 | 1.029601 | 0.724437 | 1.463314 |
| G2E3    | 0.161493 | 1.251444 | 0.914207 | 1.713081 |
| ULK1    | 0.291009 | 1.173228 | 0.872159 | 1.578226 |
| EXTL2   | 0.826328 | 1.036968 | 0.749789 | 1.434139 |
| DENND1A | 0.030228 | 1.421774 | 1.034206 | 1.954581 |
| ANAPC1  | 0.163466 | 1.282291 | 0.903866 | 1.819154 |
| TNP03   | 0.085551 | 1.384937 | 0.955449 | 2.007486 |
| PIGO    | 0.152245 | 1.263746 | 0.917244 | 1.741144 |
| STK35   | 0.38666  | 1.14668  | 0.841128 | 1.56323  |
| MFN2    | 0.721829 | 1.069326 | 0.739351 | 1.546569 |
| DCAF7   | 0.432367 | 1.148048 | 0.813358 | 1.620461 |
| CENPE   | 0.010141 | 1.316577 | 1.067548 | 1.623697 |
| INTS4   | 0.423533 | 1.174936 | 0.791678 | 1.743731 |
| C9orf78 | 0.625958 | 1.137254 | 0.678033 | 1.907496 |
| SMARCD1 | 0.300102 | 1.228896 | 0.832148 | 1.814804 |
| RILP    | 0.251797 | 0.847108 | 0.637814 | 1.125079 |
| ECE2    | 0.029249 | 1.320174 | 1.028447 | 1.694653 |
| NEK2    | 0.001878 | 1.293196 | 1.099677 | 1.52077  |
| PCBP1   | 0.123229 | 1.414431 | 0.910133 | 2.198157 |
| TESMIN  | 0.008689 | 1.274377 | 1.063283 | 1.527381 |
| RAN     | 0.037055 | 1.44703  | 1.022434 | 2.047954 |
| PPT2    | 0.013074 | 1.382595 | 1.070485 | 1.785703 |
| PHGDH   | 0.485139 | 1.05022  | 0.915232 | 1.205117 |
| CELSR3  | 0.225721 | 1.126597 | 0.928997 | 1.366229 |
| PTS     | 0.164527 | 1.285113 | 0.902256 | 1.83043  |
| ABCF2   | 0.306996 | 1.235932 | 0.823173 | 1.855659 |
| CFL2    | 0.496487 | 1.09886  | 0.837411 | 1.441936 |
| PBK     | 0.008297 | 1.241725 | 1.057336 | 1.45827  |
| CIZ1    | 0.558337 | 1.123955 | 0.759998 | 1.662208 |
| PGM3    | 0.035285 | 1.404603 | 1.023697 | 1.927241 |
| EYA2    | 0.579447 | 0.969031 | 0.867    | 1.083069 |
| PRPF19  | 0.06266  | 1.488933 | 0.979185 | 2.264048 |
| TUBA1C  | 0.03155  | 1.337455 | 1.026042 | 1.743384 |
| LSM14A  | 0.135935 | 1.299283 | 0.920973 | 1.832993 |
| APEX2   | 0.165556 | 1.352498 | 0.882629 | 2.072503 |
| ATP1B3  | 0.12737  | 1.244463 | 0.93945  | 1.648504 |
| COPG2   | 0.670083 | 0.936857 | 0.693995 | 1.264708 |
| SAAL1   | 0.052236 | 1.418606 | 0.996623 | 2.019262 |
| SLBP    | 0.01381  | 1.551378 | 1.093704 | 2.200572 |
| WDR77   | 0.752996 | 0.932058 | 0.601352 | 1.444632 |
| RPA3    | 0.36981  | 1.139331 | 0.856732 | 1.515146 |
| XXYL1   | 0.005667 | 1.489882 | 1.123252 | 1.976181 |
| STRN4   | 0.007302 | 1.636116 | 1.141839 | 2.344353 |
| CEP41   | 0.418558 | 1.180269 | 0.789908 | 1.763541 |

|          |          |          |          |          |
|----------|----------|----------|----------|----------|
| ZCCHC8   | 0.351705 | 1.248449 | 0.78262  | 1.991547 |
| SLC37A3  | 0.461552 | 1.157807 | 0.783865 | 1.710138 |
| ENO1     | 0.10246  | 1.303993 | 0.94825  | 1.793195 |
| GANAB    | 0.019717 | 1.560896 | 1.073566 | 2.269444 |
| MORC2    | 0.744714 | 1.062254 | 0.738507 | 1.527924 |
| SENP1    | 0.025264 | 1.505292 | 1.052011 | 2.153877 |
| RAD18    | 0.042145 | 1.448883 | 1.013247 | 2.071817 |
| TMEM182  | 0.381889 | 1.168712 | 0.824034 | 1.657562 |
| DCAF13   | 0.374899 | 1.161281 | 0.834646 | 1.615743 |
| NEMP1    | 0.114843 | 1.23644  | 0.949733 | 1.609701 |
| BTF3L4   | 0.620845 | 0.910065 | 0.626476 | 1.322026 |
| SMAP1    | 0.120733 | 1.346443 | 0.92472  | 1.960494 |
| RRP9     | 0.179645 | 1.276073 | 0.893777 | 1.82189  |
| CBX1     | 0.247294 | 1.197001 | 0.882665 | 1.62328  |
| PLAGL2   | 0.673685 | 0.944767 | 0.725227 | 1.230764 |
| CAMKK2   | 0.57514  | 1.142345 | 0.717282 | 1.8193   |
| CCDC51   | 0.051008 | 1.435551 | 0.998417 | 2.064075 |
| TWF1     | 0.024918 | 1.361977 | 1.039712 | 1.78413  |
| MRPS16   | 0.059448 | 1.478709 | 0.984536 | 2.220925 |
| SMIM10L1 | 0.926062 | 0.980859 | 0.652127 | 1.475302 |
| KATNA1   | 0.94385  | 1.015704 | 0.658347 | 1.567037 |
| SLC7A1   | 0.0076   | 1.39949  | 1.093431 | 1.791217 |
| DLGAP5   | 0.001675 | 1.311168 | 1.107325 | 1.552535 |
| NUP210   | 0.705726 | 1.04315  | 0.837755 | 1.298902 |
| RCC1     | 0.453256 | 1.107755 | 0.847812 | 1.447397 |
| TEFM     | 0.774855 | 1.063683 | 0.696768 | 1.623813 |
| MTIF2    | 0.038483 | 1.497106 | 1.02162  | 2.193893 |
| CUL1     | 0.164474 | 1.444501 | 0.860078 | 2.426038 |
| TOR1A    | 0.075644 | 1.575019 | 0.95418  | 2.59981  |
| RACGAP1  | 0.005522 | 1.325365 | 1.086245 | 1.617124 |
| TTK      | 0.020043 | 1.227494 | 1.032747 | 1.458963 |
| PRKX     | 0.680176 | 0.942286 | 0.710281 | 1.250071 |
| EXOC2    | 0.553436 | 1.111964 | 0.782809 | 1.579521 |
| GARS     | 0.009296 | 1.494932 | 1.104167 | 2.023988 |
| RPAP1    | 0.146689 | 1.295682 | 0.913216 | 1.838331 |
| ZC3HC1   | 0.202145 | 1.371283 | 0.844128 | 2.227642 |
| KCMF1    | 0.031274 | 1.570584 | 1.041419 | 2.368627 |
| DDX56    | 0.00884  | 1.696726 | 1.142154 | 2.520568 |
| GNPDA1   | 0.660464 | 1.072529 | 0.784745 | 1.465851 |
| DPP3     | 0.042957 | 1.416601 | 1.011101 | 1.984724 |
| TRMT5    | 0.673019 | 0.910342 | 0.588486 | 1.408229 |
| ASF1A    | 0.774234 | 1.051409 | 0.746459 | 1.48094  |
| GCLC     | 0.006774 | 1.175638 | 1.0457   | 1.321722 |
| SNX7     | 0.02697  | 1.3541   | 1.035138 | 1.771345 |
| SLC35F6  | 0.145004 | 1.323441 | 0.907889 | 1.929198 |
| FAM216A  | 0.655926 | 0.928805 | 0.671157 | 1.285361 |
| TACO1    | 0.040034 | 1.548822 | 1.020106 | 2.351568 |
| PDE6D    | 0.221402 | 1.332531 | 0.841085 | 2.111131 |
| TMSB15A  | 0.403149 | 0.906328 | 0.719688 | 1.14137  |
| TSACC    | 0.590744 | 1.069518 | 0.837155 | 1.366377 |
| ABITRAM  | 0.154411 | 1.32831  | 0.898684 | 1.963323 |
| COASY    | 0.051986 | 1.458283 | 0.99676  | 2.133502 |
| IFT52    | 0.792643 | 0.951297 | 0.655609 | 1.380342 |
| FAM24B   | 0.894706 | 1.018497 | 0.776399 | 1.336086 |

|         |          |          |          |          |
|---------|----------|----------|----------|----------|
| UGGT1   | 0.140947 | 1.254302 | 0.927693 | 1.695898 |
| GTF2E1  | 0.399842 | 1.178871 | 0.803696 | 1.729182 |
| POLR2H  | 0.062536 | 1.406438 | 0.982307 | 2.013697 |
| SSX2IP  | 0.657641 | 1.061166 | 0.816122 | 1.379785 |
| ASAH2B  | 0.179836 | 1.321826 | 0.879233 | 1.987213 |
| CDC25B  | 0.823774 | 0.976108 | 0.788983 | 1.207614 |
| TMEM41A | 0.015144 | 1.482129 | 1.07893  | 2.036006 |
| TEAD4   | 0.019251 | 1.372212 | 1.05281  | 1.788514 |
| EIF3D   | 0.226668 | 1.288042 | 0.854507 | 1.941532 |
| FOXRED1 | 0.902832 | 1.021425 | 0.726784 | 1.435515 |
| CARS    | 0.035057 | 1.548035 | 1.031103 | 2.324126 |
| SMG8    | 0.531716 | 1.116297 | 0.790748 | 1.575875 |
| PET117  | 0.655931 | 0.922289 | 0.646121 | 1.316498 |
| PXYLP1  | 0.576823 | 1.103878 | 0.780137 | 1.561964 |
| ODF2    | 0.454292 | 1.141551 | 0.807046 | 1.614702 |
| CTNNAL1 | 0.6292   | 1.067407 | 0.819095 | 1.390997 |
| PPIF    | 0.035225 | 1.39334  | 1.023233 | 1.897316 |
| GTF3C2  | 0.177962 | 1.307488 | 0.885159 | 1.93132  |
| RNF214  | 0.314965 | 1.209845 | 0.834385 | 1.754256 |
| HDAC2   | 0.013529 | 1.510419 | 1.088818 | 2.095269 |
| SRRD    | 0.777655 | 1.062593 | 0.697194 | 1.619499 |
| PRKDC   | 0.179543 | 1.17601  | 0.928089 | 1.490159 |
| SOX2    | 0.723491 | 0.9829   | 0.893329 | 1.081451 |
| PI4KA   | 0.919066 | 0.984573 | 0.729476 | 1.328879 |
| SNRPE   | 0.057297 | 1.413973 | 0.989321 | 2.020902 |
| SUMO2   | 0.128962 | 1.389611 | 0.908704 | 2.125027 |
| TGS1    | 0.628131 | 0.923102 | 0.667779 | 1.276048 |
| OTUB1   | 0.02279  | 1.817396 | 1.086723 | 3.039347 |
| DTX3L   | 0.614269 | 1.080427 | 0.799735 | 1.459638 |
| PPP1R2  | 0.053144 | 1.457155 | 0.994909 | 2.134166 |
| NME6    | 0.913279 | 1.028206 | 0.623259 | 1.69626  |
| FAM83D  | 0.023686 | 1.21411  | 1.026259 | 1.436347 |
| TMEM14A | 0.327463 | 1.150903 | 0.868697 | 1.524787 |
| BRD7    | 0.907436 | 0.973022 | 0.613632 | 1.542898 |
| SEPHS1  | 0.56201  | 1.13562  | 0.738824 | 1.745521 |
| NMD3    | 0.032323 | 1.409229 | 1.02934  | 1.929321 |
| DKC1    | 0.188298 | 1.258505 | 0.893502 | 1.772615 |
| VIRMA   | 0.411116 | 1.177423 | 0.797605 | 1.738111 |
| SEMA3A  | 0.214898 | 1.083045 | 0.954757 | 1.228571 |
| TOP2A   | 0.04568  | 1.161892 | 1.002885 | 1.346109 |
| CISD2   | 0.037674 | 1.550407 | 1.0253   | 2.344448 |
| CNOT9   | 0.00321  | 2.104206 | 1.282927 | 3.451236 |
| HMCES   | 0.092956 | 1.397012 | 0.94581  | 2.063462 |
| DSP     | 0.099851 | 1.117372 | 0.97902  | 1.275276 |
| SKA1    | 0.002284 | 1.320998 | 1.104648 | 1.579723 |
| ATP2A2  | 0.097397 | 1.299356 | 0.953356 | 1.770928 |
| HSPE1   | 0.089434 | 1.315725 | 0.958621 | 1.805858 |
| PPIA    | 0.07467  | 1.404384 | 0.966752 | 2.040126 |
| BRIP1   | 0.071096 | 1.257056 | 0.980533 | 1.611563 |
| RBM38   | 0.872763 | 0.979216 | 0.757263 | 1.266223 |
| NUP98   | 0.50255  | 1.136542 | 0.781803 | 1.652241 |
| PIGX    | 0.002425 | 1.587094 | 1.177474 | 2.139213 |
| ALYREF  | 0.015829 | 1.43032  | 1.069483 | 1.912899 |
| DEPDC1  | 0.012681 | 1.251734 | 1.049149 | 1.493437 |

|          |          |          |          |          |
|----------|----------|----------|----------|----------|
| HNRNPL   | 0.018232 | 1.975819 | 1.122594 | 3.477538 |
| TRMT6    | 0.219487 | 1.212365 | 0.891533 | 1.648654 |
| LIPT2    | 0.972914 | 0.99459  | 0.727175 | 1.360344 |
| SRF      | 0.174812 | 1.28854  | 0.893446 | 1.85835  |
| NOP14    | 0.129527 | 1.331183 | 0.919631 | 1.926911 |
| AARS     | 0.257482 | 1.211259 | 0.869291 | 1.687752 |
| VIPAS39  | 0.988634 | 1.003669 | 0.606386 | 1.66124  |
| TATDN1   | 0.279409 | 1.183685 | 0.872029 | 1.606723 |
| AKIRIN2  | 0.413377 | 1.188864 | 0.785425 | 1.799531 |
| ACTRT3   | 0.045782 | 1.388105 | 1.006165 | 1.915029 |
| DDB1     | 0.069948 | 1.476029 | 0.968762 | 2.248912 |
| ASF1B    | 0.016404 | 1.268324 | 1.044529 | 1.540069 |
| SLC33A1  | 0.027677 | 1.564077 | 1.050362 | 2.329042 |
| GPR107   | 0.138619 | 1.292527 | 0.920355 | 1.8152   |
| POLQ     | 0.007432 | 1.378494 | 1.089768 | 1.743715 |
| PPP2R3C  | 0.996587 | 0.999276 | 0.716983 | 1.392714 |
| LYAR     | 0.000246 | 1.829236 | 1.324519 | 2.526279 |
| DSN1     | 0.40025  | 1.116976 | 0.863177 | 1.4454   |
| Clorf109 | 0.801924 | 0.950711 | 0.640533 | 1.411094 |
| NUP85    | 0.26281  | 1.221679 | 0.860506 | 1.734444 |
| TIMMDC1  | 0.108449 | 1.389064 | 0.929945 | 2.074852 |
| SMYD2    | 0.803456 | 1.045309 | 0.737376 | 1.481836 |
| CENPA    | 0.011099 | 1.233612 | 1.049082 | 1.450599 |
| CHEK1    | 0.002015 | 1.384282 | 1.126137 | 1.701602 |
| EXOSC10  | 0.683114 | 1.09334  | 0.712328 | 1.678151 |
| RPIA     | 0.046111 | 0.657741 | 0.435762 | 0.992797 |
| PEX3     | 0.486709 | 0.892114 | 0.646713 | 1.230633 |
| PVR      | 0.001629 | 1.458418 | 1.153281 | 1.84429  |
| WDR3     | 0.192342 | 1.239835 | 0.897429 | 1.712881 |
| TCOF1    | 0.063445 | 1.361706 | 0.982865 | 1.88657  |
| DHCR7    | 0.058243 | 1.25968  | 0.991975 | 1.599631 |
| IGF2BP2  | 0.041609 | 1.162751 | 1.005748 | 1.344263 |
| MZT1     | 0.006864 | 1.441676 | 1.105828 | 1.879522 |
| NDUFB5   | 0.118826 | 1.282669 | 0.938116 | 1.753771 |
| INTS7    | 0.018304 | 1.54148  | 1.076014 | 2.208298 |
| CIAPIN1  | 0.018729 | 1.683687 | 1.090496 | 2.599552 |
| UCHL1    | 0.43317  | 1.035531 | 0.948954 | 1.130008 |
| MAP6D1   | 0.058328 | 1.28616  | 0.991168 | 1.668946 |
| LAMC1    | 0.106329 | 1.23614  | 0.955715 | 1.598848 |
| OPA1     | 0.002905 | 1.554545 | 1.162745 | 2.078366 |
| YWHAE    | 0.041796 | 1.520407 | 1.015679 | 2.275951 |
| KLC2     | 0.023806 | 1.44398  | 1.050021 | 1.985748 |
| THAP10   | 0.057458 | 1.385298 | 0.989733 | 1.938957 |
| NUDT1    | 0.08292  | 1.281876 | 0.968156 | 1.697254 |
| ISY1     | 0.417725 | 1.226934 | 0.748168 | 2.012073 |
| CDC6     | 0.00635  | 1.256449 | 1.066456 | 1.480291 |
| NRBP1    | 0.138114 | 1.362235 | 0.905323 | 2.049748 |
| EXOSC9   | 0.528001 | 1.145696 | 0.750948 | 1.747949 |
| GEMIN5   | 0.289774 | 1.200007 | 0.856209 | 1.68185  |
| VPS33A   | 0.105532 | 1.506393 | 0.917221 | 2.474019 |
| CHD8     | 0.664133 | 1.074238 | 0.777532 | 1.484166 |
| LOXL3    | 0.346201 | 0.86876  | 0.64829  | 1.164206 |
| EMC9     | 0.174748 | 1.2329   | 0.911187 | 1.668198 |
| CCT5     | 0.037341 | 1.331717 | 1.016936 | 1.743935 |

|           |          |          |          |          |
|-----------|----------|----------|----------|----------|
| FANCG     | 0.162248 | 1.209374 | 0.926351 | 1.578867 |
| RFC5      | 0.092349 | 1.288704 | 0.959142 | 1.731506 |
| SART1     | 0.11527  | 1.333927 | 0.931986 | 1.909217 |
| HNRNPA2B1 | 0.047663 | 1.524932 | 1.004356 | 2.315331 |
| CENPF     | 0.01411  | 1.229073 | 1.042431 | 1.449134 |
| NFYB      | 0.285034 | 1.289524 | 0.809053 | 2.055329 |
| FXR2      | 0.048408 | 1.466319 | 1.00268  | 2.144344 |
| GID8      | 0.378317 | 0.841215 | 0.572595 | 1.235852 |
| POLA2     | 0.001746 | 1.622009 | 1.198209 | 2.195705 |
| RNF220    | 0.536985 | 0.849061 | 0.505062 | 1.427358 |
| NRDC      | 0.291844 | 1.236248 | 0.833383 | 1.833862 |
| ACAD9     | 0.588988 | 1.115288 | 0.75074  | 1.656856 |
| KIAA1211  | 0.213181 | 1.139298 | 0.927823 | 1.398972 |
| RPP25     | 0.074191 | 1.22365  | 0.980463 | 1.527156 |
| PAFAH1B3  | 0.080864 | 1.244796 | 0.973481 | 1.591728 |
| FUBP3     | 0.066111 | 1.459222 | 0.975165 | 2.183557 |
| INCENP    | 0.007278 | 1.372541 | 1.089164 | 1.729647 |
| FKBP4     | 0.000359 | 1.491645 | 1.197542 | 1.857975 |
| SRPRB     | 0.161932 | 1.253601 | 0.913275 | 1.720747 |
| DHX30     | 0.161887 | 1.352294 | 0.885954 | 2.064101 |
| COX10     | 0.02035  | 1.673586 | 1.083164 | 2.585843 |
| COA7      | 0.554454 | 1.110292 | 0.784831 | 1.570719 |
| H2AFY     | 0.062347 | 1.533307 | 0.978193 | 2.403442 |
| TFG       | 0.004812 | 1.690609 | 1.173578 | 2.435424 |
| CSTF1     | 0.914716 | 1.025199 | 0.650125 | 1.616664 |
| PSMD1     | 0.033524 | 1.436737 | 1.028664 | 2.006693 |
| LYRM2     | 0.807502 | 1.05302  | 0.694949 | 1.595585 |
| MRPS35    | 0.008474 | 1.501089 | 1.109359 | 2.031145 |
| HIRA      | 0.978157 | 0.994672 | 0.678554 | 1.458059 |
| TEX30     | 0.132874 | 1.209295 | 0.943838 | 1.549411 |
| MRM2      | 0.278102 | 1.232072 | 0.844983 | 1.796488 |
| TUBG1     | 0.080351 | 1.265229 | 0.971972 | 1.646965 |
| TMEM44    | 0.062854 | 1.272423 | 0.987165 | 1.640111 |
| FNTA      | 0.305524 | 1.194114 | 0.850497 | 1.676559 |
| PSMA7     | 0.494184 | 1.133138 | 0.791887 | 1.621445 |
| CDC45     | 0.018228 | 1.230235 | 1.035819 | 1.461142 |
| WDR43     | 0.19262  | 1.239871 | 0.897234 | 1.713355 |
| STC2      | 0.00434  | 1.271608 | 1.078071 | 1.49989  |
| TMEM263   | 0.123646 | 1.28297  | 0.934238 | 1.761878 |
| DNAJB11   | 0.003533 | 1.663368 | 1.1817   | 2.341368 |
| TPX2      | 0.004189 | 1.245016 | 1.071598 | 1.446498 |
| MCMBP     | 0.448099 | 1.161275 | 0.789154 | 1.708868 |
| FAM122B   | 0.892903 | 1.022912 | 0.735555 | 1.422529 |
| PNPT1     | 0.371218 | 1.15442  | 0.842695 | 1.581456 |
| ESF1      | 0.443109 | 1.12767  | 0.829526 | 1.532971 |
| DDOST     | 0.838602 | 1.048542 | 0.664502 | 1.654532 |
| MAK16     | 0.231058 | 1.279131 | 0.85496  | 1.913744 |
| NT5DC3    | 0.147481 | 1.225766 | 0.930641 | 1.61448  |
| OTUB2     | 0.813929 | 1.03731  | 0.764595 | 1.407296 |
| PACC1     | 0.916495 | 1.016282 | 0.751447 | 1.374453 |
| GKAP1     | 0.727284 | 0.938797 | 0.658295 | 1.338822 |
| COPS8     | 0.041959 | 1.545149 | 1.015949 | 2.350007 |
| CCHCR1    | 0.968954 | 0.994598 | 0.757159 | 1.306497 |
| AK4       | 0.046714 | 1.160744 | 1.00217  | 1.34441  |

|          |          |          |          |          |
|----------|----------|----------|----------|----------|
| RAB6B    | 0.43253  | 0.920288 | 0.747884 | 1.132434 |
| METTL5   | 0.00321  | 1.833037 | 1.225001 | 2.742876 |
| POP5     | 0.555858 | 1.128079 | 0.755398 | 1.684624 |
| PLCB1    | 0.385593 | 1.100893 | 0.886021 | 1.367875 |
| CCDC134  | 0.807347 | 0.954787 | 0.658269 | 1.384872 |
| CSTF2    | 0.60725  | 1.093509 | 0.777657 | 1.537646 |
| AACS     | 0.076238 | 1.368608 | 0.967441 | 1.936125 |
| CDCA2    | 0.004469 | 1.356508 | 1.099339 | 1.673837 |
| SPPL3    | 0.679185 | 1.099601 | 0.701164 | 1.72445  |
| BAG5     | 0.182936 | 1.338129 | 0.871627 | 2.054307 |
| NUP188   | 0.336016 | 1.173983 | 0.846728 | 1.627719 |
| LDAH     | 0.62852  | 1.097664 | 0.75253  | 1.601087 |
| HEATR1   | 0.101785 | 1.317391 | 0.946927 | 1.83279  |
| CYCS     | 0.01183  | 1.450039 | 1.085734 | 1.936582 |
| HAUS8    | 0.528217 | 1.132776 | 0.768942 | 1.668763 |
| SMNDC1   | 0.092373 | 1.474634 | 0.938084 | 2.318071 |
| HDGFL3   | 0.079409 | 1.250323 | 0.974126 | 1.604832 |
| WDR62    | 0.018544 | 1.273241 | 1.041315 | 1.556824 |
| LRRCC1   | 0.984239 | 0.997063 | 0.744716 | 1.334918 |
| APOO     | 0.044051 | 1.382385 | 1.008663 | 1.894574 |
| KHK      | 0.514846 | 0.902888 | 0.663935 | 1.227843 |
| POGLUT2  | 0.19852  | 1.166776 | 0.922308 | 1.476044 |
| TMEM125  | 0.004338 | 0.771593 | 0.645671 | 0.922073 |
| PHB2     | 0.122055 | 1.306176 | 0.931019 | 1.832505 |
| CSNK2A1  | 0.16197  | 1.280767 | 0.905421 | 1.811715 |
| FXR1     | 0.001599 | 1.694389 | 1.221213 | 2.350903 |
| C18orf54 | 0.001605 | 1.590849 | 1.19226  | 2.122692 |
| USP11    | 0.688339 | 1.065379 | 0.781824 | 1.451775 |
| GNPNAT1  | 7.16E-06 | 1.919911 | 1.444099 | 2.552498 |
| TXNDC16  | 0.429765 | 0.89207  | 0.671857 | 1.184462 |
| CBFA2T2  | 0.665056 | 0.935459 | 0.691595 | 1.265312 |
| NOC4L    | 0.294741 | 1.2202   | 0.840918 | 1.77055  |
| CTPS1    | 0.129246 | 1.204065 | 0.947231 | 1.530536 |
| NGDN     | 0.729152 | 1.076258 | 0.709992 | 1.631473 |
| HAT1     | 0.026283 | 1.509392 | 1.04975  | 2.170293 |
| FANCA    | 0.011386 | 1.380585 | 1.075436 | 1.772318 |
| LIG1     | 0.035831 | 1.375877 | 1.021338 | 1.853487 |
| METTL4   | 0.656866 | 1.091563 | 0.74162  | 1.60663  |
| LRR1     | 0.293984 | 1.181672 | 0.865162 | 1.613975 |
| GOLT1B   | 0.124046 | 1.220538 | 0.946792 | 1.573433 |
| ANKRD52  | 0.062391 | 1.286062 | 0.987062 | 1.675636 |
| ITPRIPL1 | 0.341692 | 0.848236 | 0.60418  | 1.190877 |
| WDR5B    | 0.420459 | 0.856946 | 0.588626 | 1.247578 |
| SLC38A7  | 0.150854 | 1.274672 | 0.915366 | 1.775015 |
| DCUN1D5  | 0.038421 | 1.403382 | 1.018231 | 1.934219 |
| ACLY     | 0.480918 | 1.110032 | 0.830362 | 1.483897 |
| HSP90AB1 | 0.454367 | 1.129282 | 0.821248 | 1.552855 |
| TMEM185B | 0.319708 | 1.169403 | 0.859202 | 1.591597 |
| TBPL1    | 0.714225 | 1.075437 | 0.728672 | 1.587221 |
| METTL21A | 0.118385 | 1.383952 | 0.920446 | 2.080864 |
| ZNF280B  | 0.135781 | 0.82431  | 0.639499 | 1.06253  |
| GIT1     | 0.543144 | 1.113458 | 0.787465 | 1.574406 |
| CHEK2    | 0.727569 | 0.957976 | 0.752405 | 1.219714 |
| DVL3     | 0.078174 | 1.318631 | 0.969297 | 1.793865 |

|          |          |          |          |          |
|----------|----------|----------|----------|----------|
| GFMI     | 0.011754 | 1.537249 | 1.100192 | 2.147929 |
| THUMPD3  | 0.16194  | 1.352017 | 0.88598  | 2.063198 |
| DDX50    | 0.628578 | 0.900924 | 0.59033  | 1.374933 |
| HSD17B10 | 0.463523 | 1.153512 | 0.787399 | 1.689855 |
| TTC39C   | 0.385417 | 0.901183 | 0.712484 | 1.139859 |
| NLN      | 0.092334 | 1.328535 | 0.954367 | 1.849401 |
| RNGTT    | 0.187306 | 1.304915 | 0.878577 | 1.938139 |
| CPOX     | 0.540874 | 0.902735 | 0.650311 | 1.25314  |
| EME1     | 0.059545 | 1.245898 | 0.991192 | 1.566055 |
| AKT2     | 0.008617 | 1.699521 | 1.144132 | 2.524508 |
| DDIAS    | 0.043165 | 1.258154 | 1.007082 | 1.57182  |
| HCCS     | 0.015111 | 1.614696 | 1.09706  | 2.376573 |
| NEK3     | 0.714681 | 1.064915 | 0.760101 | 1.491965 |
| LRRC47   | 0.684904 | 1.097684 | 0.699788 | 1.721824 |
| RNF7     | 0.328505 | 1.243678 | 0.803044 | 1.926089 |
| ZCCHC3   | 0.751645 | 0.938467 | 0.633293 | 1.390699 |
| NDC80    | 0.011902 | 1.259517 | 1.05224  | 1.507625 |
| SEC61A1  | 0.055722 | 1.499516 | 0.990146 | 2.270925 |
| JMJD6    | 0.033113 | 1.540543 | 1.035236 | 2.292494 |
| UBA1     | 0.042109 | 1.470091 | 1.013836 | 2.131672 |
| CENPH    | 0.00399  | 1.432057 | 1.121458 | 1.828679 |
| MAP4K4   | 0.010403 | 1.422055 | 1.086274 | 1.861629 |
| RIOX1    | 0.720341 | 1.080852 | 0.706165 | 1.654344 |
| RPA1     | 0.137894 | 1.319485 | 0.914847 | 1.903096 |
| CCDC34   | 0.010598 | 1.336342 | 1.06992  | 1.669107 |
| ACTL6A   | 0.016582 | 1.410874 | 1.064625 | 1.869734 |
| SNRPA    | 0.003974 | 2.103024 | 1.268087 | 3.487702 |
| ERCC3    | 0.167292 | 1.374386 | 0.875173 | 2.158358 |
| CSTF2T   | 0.100146 | 1.413705 | 0.93566  | 2.13599  |
| PLAA     | 0.300454 | 1.201334 | 0.848931 | 1.700025 |
| ATXN7L3B | 0.28608  | 1.241013 | 0.834604 | 1.845321 |
| PPM1H    | 0.797211 | 1.024775 | 0.850275 | 1.235088 |
| TSN      | 0.275881 | 1.207789 | 0.86002  | 1.696184 |
| FEN1     | 0.00356  | 1.432714 | 1.125004 | 1.824589 |
| ZMYM3    | 0.697908 | 0.939779 | 0.686778 | 1.285981 |
| ERI1     | 0.364349 | 1.162609 | 0.839563 | 1.609957 |
| SMC1A    | 0.070999 | 1.299116 | 0.977858 | 1.725918 |
| FYTTD1   | 0.007308 | 1.581626 | 1.131432 | 2.21095  |
| DNAJB6   | 0.270105 | 1.257239 | 0.837008 | 1.888454 |
| CSNK2B   | 0.251254 | 1.307438 | 0.82706  | 2.066832 |
| CDK2     | 0.054645 | 1.305549 | 0.994704 | 1.713533 |
| CTSV     | 0.001535 | 1.252121 | 1.089517 | 1.438992 |
| GINS3    | 0.005483 | 1.436086 | 1.112378 | 1.853994 |
| DNA2     | 0.138908 | 1.188121 | 0.945614 | 1.492821 |
| PTRH2    | 0.546499 | 1.141562 | 0.742353 | 1.755449 |
| ARNTL2   | 0.003533 | 1.25879  | 1.078439 | 1.469301 |
| PTPN11   | 0.105564 | 1.283093 | 0.948761 | 1.735241 |
| NUDCD1   | 0.066818 | 1.288704 | 0.98257  | 1.690217 |
| CS       | 0.152774 | 1.294444 | 0.908741 | 1.843853 |
| RAD1     | 0.450373 | 0.885422 | 0.645528 | 1.214464 |
| FAM91A1  | 0.104978 | 1.286451 | 0.948724 | 1.744401 |
| USP39    | 0.511044 | 1.154363 | 0.752355 | 1.771175 |
| COMMD2   | 0.222755 | 1.231075 | 0.881351 | 1.71957  |
| LMNB2    | 0.009318 | 1.363141 | 1.07926  | 1.721692 |



|          |          |          |          |          |
|----------|----------|----------|----------|----------|
| SUPV3L1  | 0.609046 | 1.119824 | 0.725762 | 1.727848 |
| CCT8     | 0.013394 | 1.628485 | 1.106481 | 2.396755 |
| SUDS3    | 0.063095 | 1.404679 | 0.981623 | 2.010062 |
| MYC      | 0.416502 | 1.083885 | 0.892473 | 1.316348 |
| RCC2     | 0.254879 | 1.204544 | 0.874367 | 1.659401 |
| GAR1     | 0.131603 | 1.348692 | 0.914203 | 1.989678 |
| PSMG2    | 0.715028 | 0.90633  | 0.534558 | 1.536661 |
| SPATS2   | 0.004634 | 1.666433 | 1.170206 | 2.373085 |
| TMEM237  | 0.365277 | 1.159563 | 0.841601 | 1.597651 |
| PRPF4    | 0.035072 | 1.512578 | 1.029398 | 2.222552 |
| YRDC     | 0.366444 | 1.182839 | 0.821613 | 1.70288  |
| TET3     | 0.496576 | 1.098967 | 0.837212 | 1.44256  |
| CCT7     | 0.023804 | 1.602488 | 1.064657 | 2.412015 |
| XRCC6    | 0.022257 | 1.555935 | 1.065073 | 2.273022 |
| PDCD10   | 0.038619 | 1.369595 | 1.0166   | 1.845161 |
| TXNRD3   | 0.660914 | 0.916513 | 0.620825 | 1.353034 |
| TBC1D7   | 0.971016 | 0.993803 | 0.71067  | 1.389737 |
| ITGB1BP1 | 0.998859 | 1.000284 | 0.677664 | 1.476496 |
| PRPF38A  | 0.745615 | 0.928502 | 0.593127 | 1.453509 |
| PSMC3    | 0.032688 | 1.634272 | 1.04129  | 2.564941 |
| GPR161   | 0.848911 | 1.023208 | 0.808083 | 1.295602 |
| GPR180   | 0.212153 | 1.238286 | 0.885133 | 1.732341 |
| PAK1IP1  | 0.904918 | 0.980613 | 0.7112   | 1.352085 |
| ATG16L1  | 0.012951 | 1.723126 | 1.121858 | 2.646648 |
| COPS3    | 0.421199 | 1.146529 | 0.821637 | 1.599892 |
| SPC24    | 0.005896 | 1.308726 | 1.080627 | 1.584971 |
| ALDH2    | 0.117815 | 0.842525 | 0.679714 | 1.044335 |
| NDUFS1   | 0.094192 | 1.352245 | 0.949694 | 1.925426 |
| THOC5    | 0.464587 | 0.87153  | 0.602886 | 1.25988  |
| POLE     | 0.400413 | 1.120063 | 0.859936 | 1.458877 |
| TUSC3    | 0.294352 | 1.083771 | 0.932473 | 1.259618 |
| SMARCB1  | 0.95234  | 1.013227 | 0.658513 | 1.559011 |
| SLC25A39 | 0.871749 | 1.028381 | 0.732138 | 1.444494 |
| ORC3     | 0.443535 | 1.139533 | 0.815877 | 1.591581 |
| TULP3    | 0.216603 | 1.230217 | 0.885625 | 1.708886 |
| FAM136A  | 0.054296 | 1.443892 | 0.993247 | 2.099    |
| RCN2     | 0.496544 | 1.118404 | 0.810046 | 1.544143 |
| SFXN1    | 0.001128 | 1.792821 | 1.261644 | 2.547632 |
| DBF4     | 0.225252 | 1.187457 | 0.899536 | 1.567535 |
| GATC     | 0.572507 | 1.130463 | 0.738419 | 1.730652 |
| LTV1     | 0.264042 | 1.242789 | 0.848681 | 1.819912 |
| SEPTIN2  | 0.014773 | 1.676332 | 1.106582 | 2.539433 |
| YIF1B    | 0.234052 | 1.222152 | 0.878265 | 1.70069  |
| EIF4E    | 0.031987 | 1.648746 | 1.043982 | 2.603841 |
| DIAPH3   | 0.00231  | 1.411677 | 1.130905 | 1.762157 |
| SART3    | 0.331293 | 1.225947 | 0.812804 | 1.84909  |
| PLK1     | 0.000419 | 1.383404 | 1.155158 | 1.656749 |
| EIF4G2   | 0.317854 | 1.228642 | 0.820272 | 1.84032  |
| EXOSC1   | 0.825981 | 1.061567 | 0.623211 | 1.808256 |
| HPDL     | 0.897313 | 1.012674 | 0.836382 | 1.226124 |
| RAB7A    | 0.114138 | 1.384727 | 0.924675 | 2.07367  |
| WDR46    | 0.607761 | 1.116867 | 0.732326 | 1.703329 |
| EMC8     | 0.022303 | 1.594843 | 1.068682 | 2.380057 |
| MRPS10   | 0.010923 | 1.49265  | 1.096468 | 2.031981 |

|          |          |          |          |          |
|----------|----------|----------|----------|----------|
| UBE3C    | 0.108713 | 1.375683 | 0.931666 | 2.031313 |
| SNRPD1   | 0.086607 | 1.375907 | 0.955152 | 1.982008 |
| CASP3    | 0.271855 | 1.263027 | 0.83276  | 1.915603 |
| TTI2     | 0.274133 | 1.29662  | 0.814005 | 2.065373 |
| NUS1     | 0.120371 | 1.362134 | 0.922256 | 2.011815 |
| ARHGEF39 | 0.071318 | 1.267281 | 0.979652 | 1.639357 |
| MRFAP1   | 0.002758 | 1.992452 | 1.268723 | 3.129025 |
| SLC2A3   | 0.994947 | 1.000489 | 0.859993 | 1.163938 |
| ALG8     | 0.209479 | 1.238734 | 0.88669  | 1.730552 |
| DNAJC14  | 0.214515 | 1.250074 | 0.878763 | 1.778278 |
| RNF144A  | 0.56503  | 1.078032 | 0.834598 | 1.39247  |
| RBM23    | 0.333678 | 1.287026 | 0.771629 | 2.146675 |
| DNAJC10  | 0.046888 | 1.366557 | 1.004306 | 1.859472 |
| RPRD1B   | 0.090907 | 1.371552 | 0.950914 | 1.97826  |
| GPS1     | 0.234602 | 1.296843 | 0.844769 | 1.990842 |
| SBK1     | 0.165347 | 0.908936 | 0.794238 | 1.040199 |
| OTUD6B   | 0.079794 | 1.297162 | 0.96957  | 1.73544  |
| MTPN     | 0.075046 | 1.381867 | 0.967864 | 1.972959 |
| UBE2F    | 0.011165 | 1.784833 | 1.14094  | 2.79211  |
| B4GALT5  | 0.17341  | 1.21147  | 0.919103 | 1.596839 |
| NDUFA12  | 0.141346 | 1.364646 | 0.901767 | 2.06512  |
| DNAJC19  | 0.328707 | 1.224885 | 0.815298 | 1.84024  |
| ANXA7    | 0.553813 | 1.141201 | 0.737001 | 1.767082 |
| ANKRD27  | 0.204013 | 1.249311 | 0.886144 | 1.761314 |
| NASP     | 0.598824 | 1.077387 | 0.816152 | 1.422238 |
| SLC4A1AP | 0.166905 | 1.345809 | 0.883256 | 2.050597 |
| DVL2     | 0.342271 | 1.186081 | 0.833983 | 1.686832 |
| PUS7     | 0.584792 | 1.086559 | 0.806729 | 1.463453 |
| TMEM69   | 0.763389 | 0.937616 | 0.616436 | 1.426141 |
| SNRPD3   | 0.963893 | 0.990061 | 0.642448 | 1.525757 |
| ZNF670   | 0.639584 | 0.919465 | 0.647012 | 1.306644 |
| LEO1     | 0.051729 | 1.446654 | 0.997237 | 2.098606 |
| GTSE1    | 0.00926  | 1.279466 | 1.062719 | 1.540419 |
| POLE2    | 0.08013  | 1.218141 | 0.976595 | 1.51943  |
| POLR2A   | 0.119545 | 1.240185 | 0.94576  | 1.626266 |
| TRIM59   | 0.011961 | 1.487779 | 1.091407 | 2.028102 |
| PDCD2L   | 0.095575 | 1.307256 | 0.953949 | 1.791415 |
| DNAJC11  | 0.092393 | 1.372857 | 0.949168 | 1.985672 |
| UBE2D2   | 0.269701 | 1.326989 | 0.802949 | 2.19304  |
| FZD6     | 0.316089 | 0.879447 | 0.684129 | 1.130528 |
| IMPAD1   | 0.098504 | 1.297151 | 0.952684 | 1.766171 |
| SMC3     | 0.253681 | 1.184151 | 0.885852 | 1.582897 |
| RIPK2    | 0.035745 | 1.323862 | 1.01886  | 1.720167 |
| TADA2A   | 0.620393 | 0.892244 | 0.56825  | 1.400968 |
| CSRNP2   | 0.506153 | 1.128497 | 0.790184 | 1.611656 |
| UTP14A   | 0.706009 | 1.077467 | 0.731205 | 1.587702 |
| HS2ST1   | 0.895262 | 1.021436 | 0.744864 | 1.400701 |
| LRRC42   | 0.093634 | 1.314868 | 0.954777 | 1.810767 |
| DFFA     | 0.469129 | 0.855174 | 0.559875 | 1.306225 |
| C1orf216 | 0.613106 | 0.90671  | 0.620308 | 1.325344 |
| PUS1     | 0.427222 | 1.146533 | 0.818059 | 1.606899 |
| C19orf47 | 0.021125 | 1.591581 | 1.072179 | 2.362602 |
| FOPNL    | 0.411852 | 1.155348 | 0.818339 | 1.631145 |
| NAA35    | 0.075936 | 1.43714  | 0.962865 | 2.145027 |

|           |          |          |          |          |
|-----------|----------|----------|----------|----------|
| ACTG1     | 0.105364 | 1.354496 | 0.938179 | 1.955554 |
| ARF6      | 0.357847 | 1.197486 | 0.815508 | 1.75838  |
| CDC5L     | 0.506383 | 1.120027 | 0.801721 | 1.56471  |
| ZBTB2     | 0.486312 | 1.170846 | 0.751023 | 1.825351 |
| MGME1     | 0.71769  | 1.070713 | 0.73929  | 1.550712 |
| FP565260. | 0.627405 | 0.908072 | 0.615191 | 1.340386 |
| UBAP2     | 0.195253 | 1.249562 | 0.891946 | 1.750559 |
| RFC3      | 0.015196 | 1.359489 | 1.060954 | 1.742028 |
| ANP32B    | 0.003754 | 1.83594  | 1.217345 | 2.768874 |
| XRCC5     | 0.004113 | 1.887691 | 1.223073 | 2.913463 |
| PNMA1     | 0.376889 | 1.148589 | 0.844727 | 1.561754 |
| GEMIN6    | 0.908181 | 1.028154 | 0.641424 | 1.648052 |
| POC1B     | 0.019652 | 1.408903 | 1.056334 | 1.879147 |
| HDDC2     | 0.239408 | 1.232058 | 0.870246 | 1.744297 |
| SYT11     | 0.077349 | 0.78897  | 0.606503 | 1.026332 |
| COPB2     | 0.013026 | 1.567559 | 1.099327 | 2.235225 |
| CAD       | 0.247993 | 1.159542 | 0.902025 | 1.490578 |
| ZWINT     | 0.006221 | 1.304989 | 1.078419 | 1.579161 |
| H1FX      | 0.573271 | 1.097014 | 0.794845 | 1.514055 |
| PCCB      | 0.283964 | 1.185854 | 0.86818  | 1.619768 |
| DNAJC8    | 0.705238 | 1.094229 | 0.686226 | 1.744817 |
| LIN52     | 0.959534 | 1.011423 | 0.652198 | 1.568506 |
| DHFR      | 0.011337 | 1.464005 | 1.08995  | 1.966431 |
| MRS2      | 0.632786 | 0.918701 | 0.648807 | 1.300867 |
| NELFCD    | 0.831564 | 0.964999 | 0.694932 | 1.34002  |
| HMGB1     | 0.021077 | 1.649654 | 1.078128 | 2.524152 |
| CCNF      | 0.065456 | 1.260366 | 0.985307 | 1.61221  |
| FAM111B   | 0.022589 | 1.235864 | 1.030198 | 1.482589 |
| UBQLN1    | 0.0101   | 1.719107 | 1.137679 | 2.597682 |
| DEPDC1B   | 0.003734 | 1.311209 | 1.091789 | 1.574726 |
| ATXN2L    | 0.172636 | 1.275546 | 0.899073 | 1.809661 |
| ZCRB1     | 0.048542 | 1.486143 | 1.002539 | 2.203028 |
| SMARCD2   | 0.107909 | 1.363562 | 0.934303 | 1.990041 |
| HPS3      | 0.020472 | 1.460645 | 1.060207 | 2.012327 |
| RBBP8     | 0.786275 | 0.963089 | 0.733841 | 1.263953 |
| FARSB     | 0.026022 | 1.604082 | 1.05808  | 2.431838 |
| STIP1     | 0.00648  | 1.692802 | 1.158847 | 2.472783 |
| KARS      | 0.00056  | 2.195281 | 1.404421 | 3.431492 |
| RCOR2     | 0.201241 | 1.120074 | 0.941288 | 1.332817 |
| PSRC1     | 0.20501  | 1.160763 | 0.921768 | 1.461725 |
| CASC3     | 0.455723 | 0.874984 | 0.616026 | 1.242801 |
| TMX1      | 0.15234  | 1.278321 | 0.913299 | 1.789233 |
| ZNF239    | 0.946625 | 0.990987 | 0.76025  | 1.291754 |
| MBD4      | 0.824975 | 0.955089 | 0.635593 | 1.435187 |
| CEBPZ     | 0.453437 | 1.159254 | 0.78776  | 1.705937 |
| ATG101    | 0.109937 | 1.401697 | 0.926478 | 2.120671 |
| AK6       | 0.041061 | 1.61795  | 1.01973  | 2.567112 |
| MRPS9     | 0.012423 | 1.757734 | 1.129552 | 2.735267 |
| TRMT61B   | 0.993273 | 0.998409 | 0.689611 | 1.445484 |
| HAUS2     | 0.042213 | 1.479702 | 1.013877 | 2.15955  |
| PDHA1     | 0.122877 | 1.371531 | 0.918125 | 2.048848 |
| ATP7B     | 0.941221 | 0.993403 | 0.833141 | 1.184493 |
| PELP1     | 0.412576 | 1.146532 | 0.826669 | 1.590159 |
| XRCC2     | 0.010316 | 1.314959 | 1.066723 | 1.620962 |

|          |          |          |          |          |
|----------|----------|----------|----------|----------|
| HSF2     | 0.899879 | 1.024483 | 0.702844 | 1.493311 |
| COPS2    | 0.054338 | 1.465557 | 0.992907 | 2.163201 |
| OCRL     | 0.397926 | 1.14793  | 0.833676 | 1.580641 |
| CD81     | 0.070452 | 0.743335 | 0.539037 | 1.025063 |
| C12orf65 | 0.479462 | 0.840517 | 0.519303 | 1.360415 |
| C19orf48 | 0.002979 | 1.514367 | 1.151569 | 1.991463 |
| RNASEH2A | 0.0342   | 1.277241 | 1.018394 | 1.60188  |
| RRM2     | 0.000807 | 1.324438 | 1.123687 | 1.561053 |
| HARBI1   | 0.79625  | 1.064217 | 0.663516 | 1.706901 |
| WDR12    | 0.169444 | 1.297711 | 0.894814 | 1.882014 |
| AGBL5    | 0.780292 | 1.044244 | 0.770352 | 1.415516 |
| ERGIC2   | 0.036857 | 1.459439 | 1.023338 | 2.081387 |
| ACADM    | 0.932479 | 1.013413 | 0.74461  | 1.379254 |
| KIF3C    | 0.214949 | 1.129821 | 0.931593 | 1.370229 |
| FAM207A  | 0.032726 | 1.492322 | 1.033441 | 2.154959 |
| PACS1    | 0.188315 | 1.242358 | 0.89916  | 1.71655  |
| MTA2     | 0.003473 | 1.948204 | 1.245629 | 3.047053 |
| RNF121   | 0.116598 | 1.373971 | 0.923937 | 2.04321  |
| DHX9     | 0.408155 | 1.166767 | 0.809583 | 1.681539 |
| RAB6A    | 0.470683 | 1.152804 | 0.783367 | 1.69647  |
| TAF4     | 0.949495 | 0.988984 | 0.701984 | 1.393321 |
| SARS2    | 0.276085 | 1.208252 | 0.859633 | 1.698252 |
| SMARCA1  | 0.536614 | 1.067242 | 0.8682   | 1.311915 |
| RNF157   | 0.633141 | 1.048744 | 0.862572 | 1.275099 |
| AGPAT5   | 0.483365 | 1.106677 | 0.833534 | 1.469327 |
| NAT10    | 0.614837 | 1.092428 | 0.774189 | 1.541482 |
| MUC1     | 0.716485 | 1.027646 | 0.887003 | 1.190588 |
| SLC30A6  | 0.111889 | 1.363295 | 0.930375 | 1.997661 |
| SF3B2    | 0.047268 | 1.559254 | 1.005371 | 2.418285 |
| REXO4    | 0.098399 | 1.438765 | 0.934594 | 2.214914 |
| GPN1     | 0.124361 | 1.320909 | 0.92621  | 1.883808 |
| ACAP2    | 0.176635 | 1.204712 | 0.919514 | 1.578366 |
| YARS2    | 0.001639 | 1.644387 | 1.206576 | 2.24106  |
| C12orf45 | 0.151666 | 1.318516 | 0.903477 | 1.924216 |
| PGK1     | 0.080849 | 1.229399 | 0.974981 | 1.550208 |
| NDC1     | 0.07482  | 1.270547 | 0.976308 | 1.653464 |
| PSMD11   | 0.00607  | 1.555504 | 1.134545 | 2.132654 |
| COCH     | 0.268846 | 1.078796 | 0.943088 | 1.234031 |
| SFXN4    | 0.380259 | 1.159531 | 0.833086 | 1.613894 |
| XPO5     | 0.485192 | 1.110662 | 0.827151 | 1.49135  |
| PKM      | 0.001147 | 1.766841 | 1.25372  | 2.489971 |
| RARS2    | 0.461729 | 1.158182 | 0.783322 | 1.712432 |
| UQCRHL   | 0.042554 | 1.461974 | 1.012834 | 2.110286 |
| MIS12    | 0.81042  | 1.054344 | 0.684238 | 1.62464  |
| NCAPG2   | 0.010557 | 1.344345 | 1.071537 | 1.686608 |
| ALKBH1   | 0.486111 | 0.840847 | 0.516264 | 1.369501 |
| NAA50    | 0.011663 | 1.488854 | 1.092772 | 2.028499 |
| CENPK    | 0.003718 | 1.367614 | 1.106898 | 1.689738 |
| MRPL51   | 0.035899 | 1.534353 | 1.028581 | 2.288823 |
| NMNAT3   | 0.335383 | 0.878072 | 0.673965 | 1.143991 |
| EIF2B4   | 0.302912 | 1.306264 | 0.785748 | 2.171594 |
| SHMT2    | 0.113177 | 1.263322 | 0.946044 | 1.687007 |
| TK1      | 0.001986 | 1.330391 | 1.110195 | 1.594259 |
| VARS     | 0.030396 | 1.406507 | 1.032816 | 1.915404 |

|          |          |          |          |          |
|----------|----------|----------|----------|----------|
| ZFR      | 0.735333 | 1.066142 | 0.735431 | 1.54557  |
| TMEM199  | 0.926803 | 1.024154 | 0.615502 | 1.704124 |
| NCAPD2   | 0.01497  | 1.334603 | 1.057733 | 1.683946 |
| NUP54    | 0.321329 | 1.223969 | 0.820936 | 1.824869 |
| CENPJ    | 0.197217 | 1.217467 | 0.902754 | 1.641894 |
| GLRX5    | 0.854055 | 1.040836 | 0.679474 | 1.594381 |
| RTN3     | 0.068353 | 1.41741  | 0.974066 | 2.062541 |
| CLNS1A   | 0.470064 | 1.165178 | 0.769582 | 1.764126 |
| WDR74    | 0.022976 | 1.741987 | 1.079624 | 2.810719 |
| HNRNPK   | 0.044398 | 1.773788 | 1.014457 | 3.101484 |
| C17orf80 | 0.843596 | 0.959744 | 0.638094 | 1.443531 |
| HNRNPUL2 | 0.124494 | 1.335345 | 0.923321 | 1.931229 |
| RNF8     | 0.956094 | 0.987464 | 0.630199 | 1.547265 |
| FAM131A  | 0.103148 | 1.387611 | 0.935788 | 2.057585 |
| RXYLT1   | 0.04988  | 1.505995 | 1.000215 | 2.267535 |
| TBRG4    | 0.033355 | 1.454855 | 1.030011 | 2.054933 |
| AHSA1    | 0.011254 | 1.793433 | 1.141626 | 2.817388 |
| SOX4     | 0.768808 | 1.034532 | 0.824954 | 1.297354 |
| PATL1    | 0.038068 | 1.383815 | 1.018039 | 1.881013 |
| CIP2A    | 0.043974 | 1.233068 | 1.005671 | 1.511882 |
| UBE2M    | 0.001715 | 1.994546 | 1.295454 | 3.070902 |
| RRP12    | 0.303305 | 1.175898 | 0.863741 | 1.600869 |
| SF3B6    | 0.168121 | 1.334837 | 0.885244 | 2.012767 |
| UBR7     | 0.818054 | 1.047908 | 0.703355 | 1.561247 |
| CLUH     | 0.078574 | 1.294801 | 0.970917 | 1.726728 |
| STRAP    | 0.003294 | 1.524226 | 1.150726 | 2.018956 |
| MINPP1   | 0.094441 | 1.355834 | 0.949007 | 1.937062 |
| RNF31    | 0.510385 | 1.134133 | 0.779644 | 1.649802 |
| TSC22D2  | 0.042282 | 1.309094 | 1.00943  | 1.697717 |
| ASPM     | 0.000815 | 1.37365  | 1.140655 | 1.654239 |
| SSR1     | 0.569299 | 1.110186 | 0.77455  | 1.591265 |
| MCUR1    | 0.427059 | 1.141101 | 0.823878 | 1.580467 |
| TDP2     | 0.014151 | 1.419792 | 1.07304  | 1.878596 |
| TTC4     | 0.301007 | 1.315185 | 0.782538 | 2.210389 |
| EIF2B3   | 0.672424 | 0.912648 | 0.597439 | 1.394163 |
| ZFP64    | 0.045689 | 1.462914 | 1.007317 | 2.12457  |
| PRIM1    | 0.022317 | 1.304715 | 1.038553 | 1.63909  |
| COPRS    | 0.303466 | 1.205138 | 0.844672 | 1.719434 |
| SYNJ2    | 0.089857 | 1.278443 | 0.962515 | 1.698068 |
| PAQR4    | 0.218198 | 1.142949 | 0.923981 | 1.41381  |
| ABCF3    | 0.023737 | 1.619247 | 1.066343 | 2.458834 |
| COPS5    | 0.871552 | 1.027605 | 0.738703 | 1.429495 |
| NUP35    | 0.144052 | 1.370494 | 0.897918 | 2.091785 |
| PUF60    | 0.46908  | 1.136506 | 0.803761 | 1.607001 |
| HNRNPA3  | 0.043921 | 1.516576 | 1.011409 | 2.274058 |
| CDC20    | 0.009491 | 1.238127 | 1.053585 | 1.454993 |
| PARP9    | 0.27478  | 1.190445 | 0.870639 | 1.627722 |
| HSPA13   | 0.120407 | 1.219709 | 0.949295 | 1.567153 |
| DNM1     | 0.63817  | 1.056124 | 0.841153 | 1.326034 |
| LRRC40   | 0.717797 | 1.065518 | 0.755254 | 1.503242 |
| C5orf22  | 0.89536  | 1.020231 | 0.756963 | 1.375061 |
| MCM6     | 0.059008 | 1.258212 | 0.9913   | 1.59699  |
| TTI1     | 0.119348 | 1.304311 | 0.933656 | 1.822115 |
| TFAP4    | 0.456088 | 0.858452 | 0.574653 | 1.282409 |

|           |          |          |          |          |
|-----------|----------|----------|----------|----------|
| TRAIP     | 0.208718 | 1.198498 | 0.903717 | 1.589433 |
| SNRNP200  | 0.324337 | 1.163382 | 0.861043 | 1.571882 |
| KIF4A     | 0.004034 | 1.275413 | 1.080534 | 1.505439 |
| HNRNPUL1  | 0.186608 | 1.294093 | 0.882678 | 1.897269 |
| ZYG11A    | 0.817278 | 0.975846 | 0.793053 | 1.200771 |
| NOLC1     | 0.031068 | 1.410488 | 1.031797 | 1.928167 |
| PGM2      | 0.004356 | 1.469    | 1.127736 | 1.913534 |
| ACOT7     | 0.052411 | 1.329481 | 0.997035 | 1.772775 |
| TACC3     | 0.000289 | 1.553683 | 1.224349 | 1.971603 |
| ERMP1     | 0.387277 | 1.104925 | 0.881247 | 1.385377 |
| PANX1     | 0.017907 | 1.450792 | 1.066156 | 1.974191 |
| CARMIL1   | 0.979736 | 1.003981 | 0.738887 | 1.364185 |
| DDX23     | 0.004097 | 1.778004 | 1.200283 | 2.633793 |
| DDX55     | 0.421849 | 1.153827 | 0.813783 | 1.635962 |
| GAS2L3    | 0.14338  | 1.224934 | 0.933459 | 1.607423 |
| POLD2     | 0.025786 | 1.430819 | 1.044251 | 1.960489 |
| PRPS1     | 0.957969 | 1.008514 | 0.735789 | 1.382325 |
| IMMT      | 0.103671 | 1.399233 | 0.933635 | 2.097022 |
| PRR11     | 0.007366 | 1.271828 | 1.066722 | 1.51637  |
| TTF2      | 0.338907 | 1.204935 | 0.822301 | 1.765617 |
| ECD       | 0.292885 | 1.265439 | 0.816063 | 1.962269 |
| SRSF1     | 0.05682  | 1.716506 | 0.984444 | 2.992951 |
| SLC44A1   | 0.073742 | 1.332175 | 0.972828 | 1.824258 |
| CIAO1     | 0.739949 | 1.093474 | 0.645131 | 1.853401 |
| EIF2B5    | 0.1427   | 1.342638 | 0.905446 | 1.990926 |
| RUBCN     | 0.418025 | 1.159298 | 0.81065  | 1.657894 |
| EIF3B     | 0.028349 | 1.465602 | 1.041364 | 2.062669 |
| DHX35     | 0.883956 | 0.971201 | 0.655976 | 1.437904 |
| FH        | 0.038686 | 1.462953 | 1.019987 | 2.098294 |
| PFKM      | 0.757642 | 1.04921  | 0.773307 | 1.423551 |
| POLD1     | 0.170007 | 1.226513 | 0.916255 | 1.641829 |
| ZW10      | 0.143362 | 1.281994 | 0.919158 | 1.788058 |
| FAM20B    | 0.199713 | 1.29404  | 0.872665 | 1.91888  |
| TSR2      | 0.800608 | 0.947029 | 0.620775 | 1.44475  |
| QSOX2     | 0.350957 | 1.162719 | 0.847017 | 1.59609  |
| ABRACL    | 0.827782 | 0.970981 | 0.74471  | 1.266001 |
| SNRPB     | 0.459256 | 1.115971 | 0.834549 | 1.492294 |
| ANKRD13B  | 0.844333 | 0.977021 | 0.774689 | 1.232199 |
| SRM       | 0.180602 | 1.271033 | 0.894718 | 1.805626 |
| EAF1      | 0.011968 | 1.728039 | 1.127939 | 2.647412 |
| EEF1E1    | 0.025826 | 1.489256 | 1.049215 | 2.11385  |
| RINT1     | 0.782828 | 1.057401 | 0.711013 | 1.572542 |
| AP3M1     | 0.477109 | 1.147486 | 0.785302 | 1.67671  |
| FBXL18    | 0.168511 | 1.221952 | 0.91864  | 1.625409 |
| ERLIN1    | 0.002621 | 1.598551 | 1.177674 | 2.169839 |
| HCN3      | 0.608607 | 1.069792 | 0.826329 | 1.384988 |
| FANCF     | 0.296856 | 1.237785 | 0.829055 | 1.848022 |
| DIABLO    | 0.080831 | 1.485192 | 0.952656 | 2.315417 |
| BOLA2__SM | 0.100891 | 1.280675 | 0.952976 | 1.721061 |
| TOP3A     | 0.36551  | 1.16835  | 0.834096 | 1.636552 |
| CCDC59    | 0.10001  | 1.342994 | 0.945061 | 1.908484 |
| PA2G4     | 0.012217 | 1.681136 | 1.119809 | 2.52384  |
| SND1      | 0.403536 | 1.203454 | 0.779315 | 1.858427 |
| PARS2     | 0.332522 | 0.82645  | 0.562058 | 1.215212 |

|          |          |          |          |          |
|----------|----------|----------|----------|----------|
| SC01     | 0.196434 | 1.32576  | 0.864279 | 2.033649 |
| DCAF11   | 0.670975 | 0.906207 | 0.575287 | 1.427478 |
| PLK4     | 0.01471  | 1.306063 | 1.053883 | 1.618586 |
| PPP2CA   | 0.026413 | 1.76606  | 1.068911 | 2.917893 |
| CKAP4    | 0.001572 | 1.590141 | 1.192725 | 2.119975 |
| DYNLL1   | 0.002671 | 2.062446 | 1.285906 | 3.307927 |
| NAA15    | 0.081525 | 1.335916 | 0.964394 | 1.850562 |
| HMBS     | 0.018632 | 1.415415 | 1.059725 | 1.890491 |
| NEIL3    | 0.000158 | 1.351223 | 1.155841 | 1.579632 |
| RANBP1   | 0.037117 | 1.376998 | 1.019292 | 1.860235 |
| ZNF343   | 0.728553 | 0.929533 | 0.615235 | 1.404393 |
| NAP1L1   | 0.737036 | 1.068508 | 0.725775 | 1.57309  |
| ZNF639   | 0.349696 | 1.18571  | 0.829723 | 1.694433 |
| ARF3     | 0.022152 | 1.542947 | 1.064111 | 2.237254 |
| SMC6     | 0.190249 | 1.251121 | 0.894761 | 1.74941  |
| PDCL3    | 0.121703 | 1.367456 | 0.92001  | 2.032518 |
| TEDC1    | 0.081722 | 1.274557 | 0.969916 | 1.674883 |
| EIF2B1   | 0.137089 | 1.448312 | 0.888781 | 2.360096 |
| MKI67    | 0.006344 | 1.255726 | 1.066301 | 1.478801 |
| SLC25A32 | 0.289329 | 1.214177 | 0.847975 | 1.738527 |
| MPHOSPH6 | 0.055878 | 1.443539 | 0.99083  | 2.103091 |
| CPSF7    | 0.206348 | 1.285075 | 0.870923 | 1.89617  |
| OXCT1    | 0.460872 | 0.931031 | 0.76997  | 1.125782 |
| ANAPC5   | 0.53204  | 1.15906  | 0.729524 | 1.841503 |
| POLR1B   | 0.402148 | 1.174894 | 0.805825 | 1.712996 |
| SLC27A1  | 0.052895 | 0.740933 | 0.546929 | 1.003753 |
| GSS      | 0.052179 | 1.43963  | 0.99657  | 2.079668 |
| STX3     | 0.637887 | 0.92111  | 0.654171 | 1.296973 |
| CDC25C   | 0.007186 | 1.3238   | 1.078942 | 1.624228 |
| TRAP1    | 0.158076 | 1.289791 | 0.905865 | 1.836433 |
| MCRS1    | 0.035316 | 1.603307 | 1.033    | 2.488474 |
| MAD2L1   | 0.012252 | 1.27335  | 1.053969 | 1.538393 |
| XYLB     | 0.573465 | 0.915428 | 0.673001 | 1.245181 |
| TFAP2A   | 0.00063  | 1.274667 | 1.109081 | 1.464975 |
| GAPDH    | 0.000118 | 1.705849 | 1.2998   | 2.238745 |
| ESPL1    | 0.011893 | 1.271408 | 1.054445 | 1.533012 |
| ENTR1    | 0.946299 | 1.013024 | 0.695172 | 1.476207 |
| E2F6     | 0.707823 | 1.076836 | 0.731171 | 1.585916 |
| PPAT     | 0.009021 | 1.441668 | 1.095527 | 1.897176 |
| HELLS    | 0.046242 | 1.249892 | 1.003724 | 1.556435 |
| PM20D2   | 0.543261 | 1.083985 | 0.835798 | 1.40587  |
| YWHAQ    | 0.320684 | 1.180091 | 0.851094 | 1.636263 |
| HNRNPF   | 0.06001  | 1.469052 | 0.983924 | 2.193375 |
| MRPL35   | 0.22501  | 1.33909  | 0.835533 | 2.14613  |
| NPEPPS   | 0.588508 | 1.097827 | 0.782862 | 1.539511 |
| HSPA9    | 0.014    | 1.511241 | 1.087161 | 2.100746 |
| DONSON   | 0.028215 | 1.368839 | 1.034095 | 1.811942 |
| GLO1     | 0.859759 | 0.973218 | 0.720147 | 1.315221 |
| MRPL39   | 0.020651 | 1.55879  | 1.070328 | 2.270169 |
| XPOT     | 0.075197 | 1.313537 | 0.972682 | 1.773837 |
| HNRNPH3  | 0.321736 | 1.214925 | 0.826634 | 1.785607 |
| RRP36    | 0.086784 | 1.438606 | 0.94883  | 2.181198 |
| PROSER1  | 0.621666 | 1.074579 | 0.807553 | 1.4299   |
| WDYHV1   | 0.202361 | 1.19835  | 0.907337 | 1.582699 |

|          |          |          |          |          |
|----------|----------|----------|----------|----------|
| GYS1     | 0.03215  | 1.483362 | 1.034173 | 2.127657 |
| FIGNL1   | 0.391137 | 1.114374 | 0.870044 | 1.427317 |
| MKRN2    | 0.372235 | 1.227299 | 0.782649 | 1.924569 |
| POP1     | 0.289323 | 1.191293 | 0.8618   | 1.646762 |
| CDC7     | 0.086881 | 1.225129 | 0.971031 | 1.54572  |
| CXorf56  | 0.872987 | 1.033124 | 0.692852 | 1.540509 |
| RAD51C   | 0.983658 | 1.004691 | 0.642029 | 1.572209 |
| USP14    | 0.117433 | 1.338908 | 0.92913  | 1.929411 |
| BLM      | 0.004912 | 1.419388 | 1.112028 | 1.811701 |
| NOM1     | 0.703256 | 1.077211 | 0.734693 | 1.579412 |
| EED      | 0.974601 | 1.007044 | 0.65373  | 1.551308 |
| CCNE1    | 0.020214 | 1.216028 | 1.03099  | 1.434275 |
| OTX1     | 0.268895 | 1.114449 | 0.919675 | 1.350473 |
| STT3A    | 0.105513 | 1.332842 | 0.941224 | 1.887402 |
| XPNPEP1  | 0.011445 | 1.632495 | 1.116556 | 2.386838 |
| HJURP    | 0.00057  | 1.349867 | 1.138091 | 1.601049 |
| SMC4     | 0.057606 | 1.233052 | 0.993261 | 1.530733 |
| HNRNPC   | 0.014048 | 1.842974 | 1.131432 | 3.001994 |
| LAS1L    | 0.369251 | 1.20125  | 0.805013 | 1.792521 |
| NRF1     | 0.627018 | 1.155719 | 0.644676 | 2.071874 |
| ZNF22    | 0.797669 | 0.952161 | 0.654554 | 1.38508  |
| MYBL2    | 0.019803 | 1.168095 | 1.024985 | 1.331185 |
| FTSJ3    | 0.049208 | 1.485781 | 1.001375 | 2.204513 |
| SMN2     | 0.321843 | 1.129828 | 0.887426 | 1.438443 |
| PERP     | 0.013036 | 1.283828 | 1.05402  | 1.563741 |
| RAB5IF   | 0.003278 | 1.594315 | 1.168275 | 2.175719 |
| EIF4EBP1 | 0.037123 | 1.201151 | 1.011002 | 1.427062 |
| SRPK1    | 0.012777 | 1.490281 | 1.088626 | 2.040127 |
| MLF2     | 0.076011 | 1.375731 | 0.967175 | 1.956872 |
| PDCL     | 0.624414 | 1.125527 | 0.701084 | 1.806931 |
| H2AFZ    | 0.008346 | 1.442976 | 1.098811 | 1.894939 |
| INTS8    | 0.099718 | 1.349029 | 0.94454  | 1.926735 |
| BMS1     | 0.070999 | 1.417677 | 0.970579 | 2.07073  |
| ZNF711   | 0.997966 | 0.999704 | 0.796342 | 1.254998 |
| CDH24    | 0.054554 | 1.217522 | 0.996162 | 1.488072 |
| NKIRAS2  | 0.048604 | 1.465158 | 1.002344 | 2.141668 |
| RNF4     | 0.004626 | 1.912505 | 1.220987 | 2.995669 |
| HINFP    | 0.71712  | 0.922481 | 0.596198 | 1.427329 |
| TDG      | 0.011979 | 1.495422 | 1.092564 | 2.046826 |
| NFS1     | 0.636638 | 1.100566 | 0.739527 | 1.637866 |
| BORA     | 0.004065 | 1.484927 | 1.133891 | 1.944639 |
| DTD1     | 0.42613  | 0.854076 | 0.579144 | 1.259523 |
| CENPV    | 0.989737 | 1.001277 | 0.824382 | 1.216129 |
| CKS2     | 0.025991 | 1.270769 | 1.029086 | 1.569213 |
| PPRC1    | 0.400345 | 1.149864 | 0.830443 | 1.592148 |
| SMU1     | 0.639228 | 1.108733 | 0.720122 | 1.707055 |
| PPIH     | 0.867731 | 1.030902 | 0.720554 | 1.474919 |
| MAGOH    | 0.486971 | 0.860367 | 0.563017 | 1.314758 |
| CNOT10   | 0.092456 | 1.536984 | 0.931594 | 2.535783 |
| KIF2C    | 0.010682 | 1.243366 | 1.051894 | 1.469691 |
| TEX10    | 0.077936 | 1.430072 | 0.960777 | 2.128595 |
| LSG1     | 0.016507 | 1.404726 | 1.063985 | 1.854589 |
| PCLAF    | 0.013642 | 1.258323 | 1.048324 | 1.510388 |
| AFG3L2   | 0.591783 | 1.096241 | 0.783525 | 1.533766 |



|          |          |          |          |          |
|----------|----------|----------|----------|----------|
| ZMPSTE24 | 0.759836 | 1.055258 | 0.747471 | 1.489783 |
| NARS     | 0.005469 | 1.641205 | 1.157071 | 2.327907 |
| C19orf57 | 0.804614 | 0.969186 | 0.756332 | 1.241943 |
| FANCI    | 0.003656 | 1.370198 | 1.108008 | 1.694431 |
| QTRT2    | 0.267875 | 1.243406 | 0.845757 | 1.828018 |
| TM9SF4   | 0.071841 | 1.420577 | 0.969308 | 2.081939 |
| C2orf69  | 0.616184 | 1.101809 | 0.75417  | 1.609695 |
| RFT1     | 0.204862 | 1.362368 | 0.844665 | 2.197376 |
| CRNKL1   | 0.6201   | 1.1036   | 0.747377 | 1.629611 |
| WDR53    | 0.024462 | 1.436071 | 1.047727 | 1.968357 |
| COPS7B   | 0.064588 | 1.50813  | 0.975436 | 2.331733 |
| WSB2     | 0.051435 | 1.375416 | 0.998017 | 1.895527 |
| FAM234B  | 0.672489 | 1.057523 | 0.815967 | 1.370588 |
| HBS1L    | 0.052199 | 1.438855 | 0.996544 | 2.077483 |
| TMX2     | 0.001544 | 2.078127 | 1.321384 | 3.268247 |
| GNB1L    | 0.418292 | 1.178131 | 0.792129 | 1.752231 |
| TRMT12   | 0.28792  | 1.228863 | 0.84029  | 1.797123 |
| NOL7     | 0.277125 | 1.260035 | 0.83052  | 1.911678 |
| LRRC59   | 0.014773 | 1.565332 | 1.09182  | 2.244202 |
| NUP205   | 0.413579 | 1.131273 | 0.841699 | 1.520471 |
| NRAS     | 0.075731 | 1.328628 | 0.970998 | 1.817976 |
| RFC4     | 0.010648 | 1.302374 | 1.063379 | 1.595083 |
| MRPL15   | 0.086555 | 1.245866 | 0.968926 | 1.601962 |
| FOXA1    | 0.660412 | 1.037092 | 0.881567 | 1.220054 |
| SELENOI  | 0.017896 | 1.324001 | 1.049525 | 1.670259 |
| MTCH1    | 0.750265 | 1.068132 | 0.7118   | 1.602848 |
| PTDSS1   | 0.123977 | 1.325318 | 0.925699 | 1.897449 |
| KANSL2   | 0.823194 | 1.047253 | 0.698493 | 1.57015  |
| COPZ1    | 0.015254 | 1.843894 | 1.124794 | 3.022727 |
| RPP30    | 0.228204 | 1.337305 | 0.833514 | 2.145594 |
| FBXO21   | 0.485555 | 1.133426 | 0.797125 | 1.611611 |
| RAD54B   | 0.19752  | 1.279326 | 0.879567 | 1.860774 |
| KNL1     | 0.000907 | 1.497561 | 1.179718 | 1.90104  |
| CCNA2    | 0.001361 | 1.311367 | 1.110921 | 1.54798  |
| UHRF1    | 0.007472 | 1.303666 | 1.073459 | 1.583241 |
| RPA2     | 0.647944 | 0.908825 | 0.602925 | 1.369927 |
| KDM1A    | 0.150067 | 1.301258 | 0.909136 | 1.862509 |
| IGFBPL1  | 0.04917  | 0.861961 | 0.743379 | 0.99946  |
| SUV39H2  | 0.498284 | 1.114421 | 0.814474 | 1.524829 |
| CHAF1B   | 0.020338 | 1.318004 | 1.043788 | 1.66426  |
| EXT2     | 0.551022 | 1.134306 | 0.74958  | 1.716495 |
| EIF1AD   | 0.053705 | 1.593336 | 0.9926   | 2.557645 |
| ABCC5    | 0.505025 | 0.922262 | 0.726973 | 1.170012 |
| AKIRIN1  | 0.806508 | 1.041657 | 0.751433 | 1.443974 |
| TERF1    | 0.957845 | 0.990061 | 0.683613 | 1.433882 |
| POLA1    | 0.344068 | 1.164094 | 0.849756 | 1.594711 |
| PRDM4    | 0.322989 | 1.215281 | 0.825571 | 1.788955 |
| SMUG1    | 0.166126 | 1.294494 | 0.898329 | 1.865369 |
| TRIP13   | 0.026081 | 1.216703 | 1.02364  | 1.446178 |
| C1orf131 | 0.142887 | 1.429817 | 0.886247 | 2.306781 |
| ZNF746   | 0.167205 | 1.367791 | 0.877019 | 2.133195 |
| C2orf15  | 0.963283 | 0.993655 | 0.757788 | 1.302939 |
| MTHFD2   | 0.046816 | 1.24867  | 1.003133 | 1.554307 |
| ANP32A   | 0.01929  | 1.609663 | 1.080354 | 2.3983   |

|           |          |          |          |          |
|-----------|----------|----------|----------|----------|
| AP2B1     | 0.168969 | 1.256973 | 0.907398 | 1.74122  |
| DTYMK     | 0.004073 | 1.553859 | 1.150286 | 2.099023 |
| RAMAC     | 0.105917 | 1.376881 | 0.934376 | 2.028948 |
| TRIB3     | 0.027419 | 1.25103  | 1.025248 | 1.526535 |
| CPT1C     | 0.813578 | 1.029521 | 0.808382 | 1.311154 |
| RHPN2     | 0.000561 | 1.364778 | 1.143739 | 1.628534 |
| FAM102B   | 0.493834 | 1.092947 | 0.847289 | 1.40983  |
| CSE1L     | 0.0172   | 1.389147 | 1.060015 | 1.820475 |
| UBE2D1    | 0.083458 | 1.366889 | 0.959496 | 1.947259 |
| E2F8      | 0.023296 | 1.240514 | 1.029751 | 1.494413 |
| E2F2      | 0.090556 | 1.226484 | 0.968249 | 1.55359  |
| VRK2      | 0.016737 | 1.54969  | 1.082405 | 2.218707 |
| TMEM132A  | 0.34897  | 1.092313 | 0.908029 | 1.313998 |
| KIF11     | 0.004417 | 1.313897 | 1.08876  | 1.585588 |
| PRMT1     | 0.021293 | 1.604831 | 1.072952 | 2.400369 |
| PEX5      | 0.792487 | 0.951667 | 0.657957 | 1.376487 |
| DUSP14    | 0.077839 | 1.29328  | 0.971734 | 1.721227 |
| CCDC86    | 0.021118 | 1.439407 | 1.05616  | 1.961722 |
| MAPK8IP2  | 0.457618 | 0.938083 | 0.792492 | 1.110422 |
| ADRM1     | 0.127488 | 1.346626 | 0.918409 | 1.974504 |
| SNRNP27   | 0.061408 | 1.542114 | 0.979506 | 2.427873 |
| HNRNPLL   | 0.673521 | 0.911603 | 0.592687 | 1.402125 |
| HSPH1     | 0.010524 | 1.460364 | 1.092585 | 1.951942 |
| SRP54     | 0.204239 | 1.208835 | 0.902004 | 1.62004  |
| TGIF2     | 0.361098 | 0.86431  | 0.632057 | 1.181904 |
| ARL5B     | 0.206479 | 1.214216 | 0.898493 | 1.640882 |
| NELFA     | 0.053652 | 1.45459  | 0.994127 | 2.128331 |
| DPH2      | 0.760548 | 1.05325  | 0.754447 | 1.470394 |
| PNPO      | 0.946135 | 1.010866 | 0.7388   | 1.383123 |
| PSMD14    | 0.007337 | 1.620837 | 1.13872  | 2.307075 |
| PSMC4     | 0.001191 | 1.817837 | 1.266465 | 2.609255 |
| JARID2    | 0.340079 | 1.163937 | 0.852081 | 1.58993  |
| TBP       | 0.2534   | 1.288097 | 0.8342   | 1.988965 |
| CLCN2     | 0.140507 | 1.248517 | 0.929419 | 1.677172 |
| EXO1      | 0.000821 | 1.333542 | 1.126605 | 1.578489 |
| MPHOSPH1C | 0.786761 | 0.938046 | 0.590175 | 1.490963 |
| MAPK12    | 0.26761  | 1.136399 | 0.906469 | 1.424651 |
| IDH3A     | 0.041087 | 1.445285 | 1.01502  | 2.057936 |
| RECQL4    | 0.191745 | 1.130457 | 0.940371 | 1.358967 |
| POLR2B    | 0.200479 | 1.283881 | 0.875737 | 1.882243 |
| MYL6B     | 0.224203 | 1.208868 | 0.890302 | 1.641422 |
| MYO19     | 0.022263 | 1.354822 | 1.044244 | 1.757772 |
| KDM2B     | 0.83978  | 0.958412 | 0.634913 | 1.446741 |
| CENPP     | 0.419422 | 1.229782 | 0.74435  | 2.031792 |
| NAPSA     | 0.010111 | 0.914531 | 0.85434  | 0.978963 |
| VAPB      | 0.942793 | 1.012113 | 0.728471 | 1.406196 |
| RUVBL1    | 0.022767 | 1.448804 | 1.053022 | 1.993343 |
| HMGXB4    | 0.374289 | 1.171891 | 0.825889 | 1.662849 |
| CSNK2A2   | 0.027297 | 1.626813 | 1.056031 | 2.506103 |
| PCBP2     | 0.054879 | 1.575612 | 0.990542 | 2.506257 |
| NCOA5     | 0.896455 | 0.973608 | 0.650794 | 1.456547 |
| ERI3      | 0.524492 | 0.871478 | 0.570521 | 1.331195 |
| LNP1      | 0.235015 | 0.795998 | 0.546226 | 1.159981 |
| UBTF      | 0.641788 | 0.9065   | 0.599449 | 1.370829 |

|           |          |          |          |          |
|-----------|----------|----------|----------|----------|
| BBS7      | 0.263312 | 1.297272 | 0.822209 | 2.046821 |
| RDH14     | 0.612061 | 1.124117 | 0.715213 | 1.766803 |
| EZH2      | 0.214455 | 1.144843 | 0.924691 | 1.417409 |
| TMEM189   | 0.006464 | 1.628544 | 1.146475 | 2.313312 |
| MAD2L2    | 0.646875 | 1.068851 | 0.803893 | 1.421136 |
| PPP5C     | 0.018903 | 1.605497 | 1.081282 | 2.383857 |
| RNF216    | 0.521677 | 1.131571 | 0.775318 | 1.65152  |
| GPATCH1   | 0.201177 | 1.274555 | 0.878627 | 1.848898 |
| RWDD4     | 0.016347 | 1.831603 | 1.1176   | 3.001763 |
| C1GALT1C1 | 0.382983 | 0.911018 | 0.738925 | 1.123191 |
| H2AFX     | 0.000204 | 1.701136 | 1.285206 | 2.251672 |
| RPL7L1    | 0.497607 | 1.131007 | 0.792441 | 1.614224 |
| EFTUD2    | 0.581332 | 1.118794 | 0.750722 | 1.667327 |
| LSM3      | 0.038332 | 1.639182 | 1.026917 | 2.616488 |
| MTDH      | 0.094319 | 1.300114 | 0.955988 | 1.768115 |
| SF3A1     | 0.622217 | 1.091076 | 0.771385 | 1.543258 |
| AASDHPPT  | 0.099829 | 1.382014 | 0.940083 | 2.031696 |
| CEP76     | 0.432157 | 1.164534 | 0.796327 | 1.702993 |
| TRO       | 0.522801 | 1.086324 | 0.842693 | 1.400391 |
| PRELID3A  | 0.576899 | 1.100043 | 0.786934 | 1.537733 |
| POLDIP2   | 0.078456 | 1.450799 | 0.95854  | 2.195858 |
| SF3A3     | 0.594697 | 1.123386 | 0.731792 | 1.724529 |
| MAP1B     | 0.155865 | 1.125151 | 0.956055 | 1.324154 |
| GBE1      | 0.062593 | 1.290178 | 0.986695 | 1.687004 |
| ACTR6     | 0.105837 | 1.352139 | 0.938057 | 1.949006 |
| PROB1     | 0.116058 | 1.365313 | 0.925925 | 2.013208 |
| OAS3      | 0.102713 | 1.172236 | 0.968551 | 1.418754 |
| HLTF      | 0.234461 | 1.165249 | 0.905583 | 1.499373 |
| SNRPA1    | 0.020598 | 1.557905 | 1.070404 | 2.267432 |
| DDX27     | 0.186057 | 1.248011 | 0.898677 | 1.733139 |
| SERP1     | 0.806739 | 1.047281 | 0.723306 | 1.516366 |
| AIMP2     | 0.05547  | 1.368211 | 0.992696 | 1.885776 |
| HMG2      | 0.586977 | 1.096505 | 0.786413 | 1.528871 |
| CEBPZOS   | 0.832552 | 1.041408 | 0.714944 | 1.516945 |
| MCTS2P    | 0.483287 | 1.08721  | 0.860571 | 1.373535 |
| MRPL30    | 0.064679 | 1.436666 | 0.978179 | 2.110053 |
| PSMB2     | 0.043289 | 1.527418 | 1.012857 | 2.30339  |
| PRDX1     | 0.319093 | 1.146853 | 0.875879 | 1.501658 |
| ZNF232    | 0.813683 | 1.047057 | 0.714316 | 1.534795 |
| STMN1     | 0.716124 | 1.039178 | 0.844764 | 1.278333 |
| MRPS30    | 0.542655 | 1.116763 | 0.78263  | 1.593549 |
| TOE1      | 0.793382 | 0.94349  | 0.610514 | 1.458072 |
| ABCF1     | 0.401574 | 1.148809 | 0.830756 | 1.588627 |
| ENY2      | 0.149838 | 1.361428 | 0.894602 | 2.071855 |
| SLC5A6    | 0.132404 | 1.260524 | 0.932344 | 1.704222 |
| GCSH      | 0.089679 | 1.330102 | 0.956777 | 1.849095 |
| H1FO      | 0.27913  | 1.161821 | 0.885471 | 1.524417 |
| SLC3A2    | 0.004989 | 1.503778 | 1.131097 | 1.999254 |
| CDYL      | 0.701571 | 1.068926 | 0.760132 | 1.503162 |
| AATF      | 0.121058 | 1.353195 | 0.923195 | 1.983478 |
| PARG      | 0.179302 | 1.289301 | 0.889801 | 1.868167 |
| POM121    | 0.295973 | 1.174345 | 0.868766 | 1.587408 |
| EIF4A3    | 0.26084  | 1.198343 | 0.87419  | 1.642694 |
| TOMM5     | 0.095323 | 1.330891 | 0.951189 | 1.862165 |

|          |          |          |          |          |
|----------|----------|----------|----------|----------|
| PGAM5    | 0.210147 | 1.234079 | 0.888139 | 1.714767 |
| DTL      | 0.002345 | 1.379176 | 1.121197 | 1.696515 |
| COX15    | 0.217301 | 1.271788 | 0.868035 | 1.863339 |
| ADA      | 0.052106 | 1.232106 | 0.998099 | 1.520977 |
| ERAL1    | 0.166516 | 1.3532   | 0.881583 | 2.077116 |
| NOL6     | 0.449369 | 1.135995 | 0.816392 | 1.580718 |
| LLGL1    | 0.663903 | 1.065305 | 0.800851 | 1.417087 |
| CLDND1   | 0.351384 | 1.18457  | 0.829564 | 1.691499 |
| REX05    | 0.255077 | 1.203859 | 0.874609 | 1.657055 |
| TOPBP1   | 0.130766 | 1.233848 | 0.939486 | 1.62044  |
| GMFB     | 0.080608 | 1.363518 | 0.96294  | 1.930734 |
| GNB1     | 0.625424 | 1.122803 | 0.705249 | 1.787576 |
| MCFD2    | 0.140328 | 1.289951 | 0.919606 | 1.80944  |
| ZNF74    | 0.367124 | 0.852326 | 0.602278 | 1.206186 |
| ANLN     | 0.000478 | 1.300886 | 1.122353 | 1.507819 |
| CENPN    | 0.001442 | 1.467719 | 1.15913  | 1.858463 |
| PSMC3IP  | 0.143651 | 1.22836  | 0.9324   | 1.618262 |
| UBE2C    | 0.012473 | 1.197188 | 1.039554 | 1.378724 |
| GTF3C3   | 0.046328 | 1.533777 | 1.006986 | 2.336152 |
| XRN2     | 0.961158 | 1.008309 | 0.722706 | 1.406779 |
| POLR1E   | 0.916142 | 1.01985  | 0.707364 | 1.47038  |
| EIF5A2   | 0.229422 | 1.170105 | 0.905658 | 1.511769 |
| MARS2    | 0.994361 | 0.998772 | 0.710261 | 1.404476 |
| CDCA5    | 0.001065 | 1.342439 | 1.125391 | 1.601348 |
| NCBP2    | 0.030127 | 1.507067 | 1.040216 | 2.183441 |
| ABRAXAS2 | 0.458272 | 1.174406 | 0.767927 | 1.796043 |
| NKAPD1   | 0.824846 | 1.047157 | 0.696289 | 1.574832 |
| TMEM209  | 0.414628 | 1.157365 | 0.814663 | 1.64423  |
| MRPL19   | 0.063974 | 1.421502 | 0.979777 | 2.062375 |
| EIF5     | 0.656575 | 1.097688 | 0.727866 | 1.655413 |
| DSCC1    | 0.026688 | 1.239893 | 1.02516  | 1.499605 |
| RND2     | 0.475393 | 0.931592 | 0.766862 | 1.131708 |
| KIF7     | 0.417119 | 0.90531  | 0.71194  | 1.151201 |
| NSD2     | 0.01867  | 1.401191 | 1.057843 | 1.855979 |
| CENPW    | 0.051573 | 1.1925   | 0.998799 | 1.423765 |
| MARCKSL1 | 0.870572 | 1.019202 | 0.810764 | 1.281228 |
| UBE20    | 0.495357 | 1.125647 | 0.801013 | 1.58185  |
| C1orf74  | 0.730031 | 1.079756 | 0.698307 | 1.669572 |
| FAM162A  | 0.3797   | 1.154572 | 0.837818 | 1.59108  |
| TIMM8A   | 0.805378 | 1.045664 | 0.733053 | 1.491588 |
| RAB10    | 0.004645 | 1.619676 | 1.159897 | 2.261711 |
| C12orf4  | 0.867702 | 1.032214 | 0.710808 | 1.498952 |
| DAG1     | 0.128035 | 1.246334 | 0.938582 | 1.654995 |
| FBX017   | 0.234671 | 1.13806  | 0.919466 | 1.408623 |
| GDAP1    | 0.408814 | 0.904978 | 0.714076 | 1.146915 |
| CDCA4    | 0.032125 | 1.302236 | 1.022795 | 1.658025 |
| RDX      | 0.008686 | 1.3603   | 1.080997 | 1.711768 |
| CEP250   | 0.807547 | 1.033171 | 0.794589 | 1.343388 |
| TIGD3    | 0.400972 | 0.864174 | 0.614686 | 1.214923 |
| SNRPB2   | 0.663048 | 1.089775 | 0.740259 | 1.604317 |
| CABLES2  | 0.900255 | 0.982957 | 0.751275 | 1.286088 |
| TMA16    | 0.012111 | 1.677661 | 1.11986  | 2.513302 |
| PYGL     | 0.043489 | 1.238999 | 1.006284 | 1.525532 |
| CACYBP   | 0.038108 | 1.435566 | 1.020027 | 2.020388 |

|          |          |          |          |          |
|----------|----------|----------|----------|----------|
| PHF8     | 0.802671 | 0.964294 | 0.725035 | 1.282507 |
| DNAJC7   | 0.250541 | 1.322973 | 0.82076  | 2.132485 |
| DDX39A   | 0.138779 | 1.265781 | 0.926483 | 1.729338 |
| KPNA2    | 0.005722 | 1.352741 | 1.091806 | 1.676039 |
| ARL6IP1  | 0.050474 | 1.46656  | 0.99921  | 2.152498 |
| RBMX     | 0.666219 | 1.113102 | 0.684048 | 1.811271 |
| MDH1     | 0.126133 | 1.380882 | 0.913183 | 2.088118 |
| BRCA1    | 0.037485 | 1.253751 | 1.013181 | 1.551441 |
| VANGL1   | 0.014256 | 1.444986 | 1.076499 | 1.939606 |
| DENND10  | 0.33666  | 1.230957 | 0.805658 | 1.880768 |
| PSMD2    | 0.000373 | 1.667683 | 1.258256 | 2.210335 |
| SRP72    | 0.016469 | 1.514121 | 1.078774 | 2.125156 |
| UFD1     | 0.077518 | 1.426545 | 0.961576 | 2.116349 |
| USP5     | 0.019228 | 1.53951  | 1.072765 | 2.209331 |
| RITA1    | 0.312236 | 1.207585 | 0.8376   | 1.741    |
| RTKN     | 0.598058 | 1.089241 | 0.792698 | 1.496717 |
| YES1     | 0.11068  | 1.260798 | 0.948378 | 1.676138 |
| HNRNPA0  | 0.421933 | 1.184168 | 0.783866 | 1.788896 |
| CCDC15   | 0.516359 | 1.110861 | 0.808652 | 1.52601  |
| SMARCE1  | 0.409372 | 0.834829 | 0.54367  | 1.281916 |
| KLHL23   | 0.974609 | 1.004181 | 0.77666  | 1.298353 |
| R3HDM1   | 0.010128 | 1.640626 | 1.124933 | 2.392725 |
| FIP1L1   | 0.089156 | 1.347689 | 0.95537  | 1.901111 |
| FAM220A  | 0.474935 | 1.121357 | 0.819002 | 1.535333 |
| SPAST    | 0.426641 | 1.15099  | 0.813765 | 1.627959 |
| GNAI3    | 0.252536 | 1.273924 | 0.841471 | 1.928626 |
| PHLPP1   | 0.014107 | 1.450989 | 1.077888 | 1.953236 |
| KIAA1586 | 0.343132 | 0.846298 | 0.599348 | 1.194999 |
| XP01     | 0.169107 | 1.315756 | 0.889835 | 1.945546 |
| CNKSR3   | 0.788089 | 0.958036 | 0.70085  | 1.309601 |
| FAM210A  | 0.227845 | 1.2382   | 0.874944 | 1.752271 |
| TOX4     | 0.728835 | 1.082264 | 0.692193 | 1.692151 |
| SMC2     | 0.003682 | 1.463387 | 1.131779 | 1.892155 |
| MELK     | 0.010381 | 1.222891 | 1.048475 | 1.426323 |
| DCLRE1A  | 0.800356 | 1.040342 | 0.765693 | 1.413507 |
| EIPR1    | 0.047837 | 1.529339 | 1.004056 | 2.329432 |
| KIAA1549 | 0.064473 | 1.224699 | 0.987897 | 1.518264 |
| NUDT19   | 0.010285 | 1.507755 | 1.101853 | 2.063184 |
| HTRA2    | 0.372402 | 0.824606 | 0.539777 | 1.259734 |
| GCN1     | 0.066592 | 1.350835 | 0.979629 | 1.8627   |
| HACD2    | 0.121934 | 1.265811 | 0.938963 | 1.706432 |
| NETO2    | 0.048595 | 1.236084 | 1.001308 | 1.525908 |
| U2AF2    | 0.06936  | 1.49442  | 0.96867  | 2.305522 |
| SFR1     | 0.587926 | 1.095204 | 0.788193 | 1.521801 |
| HIC2     | 0.284041 | 1.18378  | 0.869398 | 1.611847 |
| TATDN2   | 0.521481 | 1.181644 | 0.709364 | 1.968359 |
| PRIMPOL  | 0.130776 | 1.359331 | 0.912832 | 2.024228 |
| ATP5F1C  | 0.352758 | 1.206821 | 0.811789 | 1.794081 |
| FOXM1    | 0.002799 | 1.264415 | 1.084119 | 1.474696 |
| CHCHD3   | 0.030695 | 1.520536 | 1.039757 | 2.223626 |
| AURKA    | 0.00357  | 1.31556  | 1.093939 | 1.582079 |
| PSMB7    | 0.002565 | 2.024686 | 1.280084 | 3.20241  |
| CDK5R1   | 0.027056 | 1.291975 | 1.029482 | 1.621399 |
| DMAC2    | 0.105786 | 1.390847 | 0.932517 | 2.074445 |

|         |          |          |          |          |
|---------|----------|----------|----------|----------|
| BRIX1   | 0.292429 | 1.174054 | 0.870869 | 1.58279  |
| ZNF165  | 0.492682 | 0.898994 | 0.663202 | 1.218619 |
| ATIC    | 0.013512 | 1.604684 | 1.10258  | 2.335441 |
| NELFE   | 0.355113 | 1.190829 | 0.822402 | 1.724307 |
| DLGAP4  | 0.360271 | 1.166595 | 0.838592 | 1.622892 |
| TYMS    | 0.007518 | 1.319809 | 1.07683  | 1.617614 |
| PFKFB4  | 0.364073 | 1.110805 | 0.885291 | 1.393765 |
| EIF2S1  | 0.012104 | 1.64289  | 1.114777 | 2.421189 |
| LIG3    | 0.754559 | 1.057495 | 0.744858 | 1.501354 |
| DPF2    | 0.058526 | 1.613273 | 0.982898 | 2.647935 |
| GOLGA5  | 0.402725 | 1.190021 | 0.791739 | 1.78866  |
| PDCD2   | 0.152498 | 1.403809 | 0.882094 | 2.234094 |
| SIGMAR1 | 0.449919 | 1.149108 | 0.801271 | 1.647945 |
| VAMP7   | 0.528452 | 1.11299  | 0.797884 | 1.552539 |
| OSGIN2  | 0.048255 | 1.282185 | 1.001909 | 1.640866 |
| SPINDOC | 0.081648 | 1.320472 | 0.965677 | 1.805622 |
| ZNF473  | 0.753154 | 1.06366  | 0.724035 | 1.562592 |
| LZIC    | 0.908164 | 1.022992 | 0.69524  | 1.505255 |
| CAMSAP1 | 0.722158 | 1.05778  | 0.776117 | 1.441662 |
| HMMR    | 0.001318 | 1.347043 | 1.12314  | 1.615582 |
| CCNY    | 0.522785 | 0.875633 | 0.582676 | 1.315883 |
| TBCB    | 0.173876 | 1.268892 | 0.90024  | 1.788509 |
| PSMA1   | 0.041768 | 1.683582 | 1.019601 | 2.779959 |
| NUP160  | 0.620236 | 1.08928  | 0.776673 | 1.527709 |
| DDX54   | 0.021036 | 1.522056 | 1.065283 | 2.174686 |
| MUTYH   | 0.45813  | 0.875522 | 0.616245 | 1.243887 |
| TROAP   | 0.015805 | 1.219718 | 1.038021 | 1.433221 |
| DNAJC25 | 0.077924 | 1.444139 | 0.959741 | 2.173021 |
| EIF5A   | 0.00315  | 1.716306 | 1.199158 | 2.456477 |
| MAIP1   | 0.076774 | 1.416032 | 0.963295 | 2.08155  |
| FANCD2  | 0.005516 | 1.481595 | 1.122418 | 1.95571  |
| ANAPC7  | 0.549694 | 1.143398 | 0.737095 | 1.773663 |
| DDX10   | 0.155641 | 1.287945 | 0.908236 | 1.826401 |
| PRPF18  | 0.240975 | 1.332399 | 0.824715 | 2.152608 |
| ECT2    | 0.000114 | 1.445881 | 1.198933 | 1.743694 |
| ANKLE2  | 0.78322  | 1.052331 | 0.731712 | 1.513438 |
| TMEM65  | 0.132142 | 1.209331 | 0.944272 | 1.548792 |
| CMTR1   | 0.601336 | 0.903644 | 0.617919 | 1.321487 |
| GNL3    | 0.424276 | 1.147916 | 0.818378 | 1.610151 |
| SRP68   | 0.022495 | 1.655865 | 1.073744 | 2.553578 |
| SPTLC1  | 0.054487 | 1.444342 | 0.992947 | 2.100941 |
| AHCY    | 0.125533 | 1.271158 | 0.935165 | 1.72787  |
| ZMYND19 | 0.447688 | 1.148455 | 0.803411 | 1.641687 |
| MEST    | 0.796787 | 1.033807 | 0.802668 | 1.331506 |
| MED27   | 0.490572 | 1.136086 | 0.790455 | 1.632848 |
| JADE3   | 0.836893 | 1.03662  | 0.736062 | 1.459906 |
| MAGOHB  | 0.01973  | 1.560022 | 1.073428 | 2.267193 |
| NCOA6   | 0.347525 | 1.145223 | 0.863023 | 1.519699 |
| APTX    | 0.602015 | 1.124538 | 0.723434 | 1.74803  |
| RELA    | 0.012692 | 1.964553 | 1.155148 | 3.341101 |
| BANP    | 0.303554 | 1.223301 | 0.83326  | 1.795917 |
| TMEM117 | 0.065896 | 1.308453 | 0.982491 | 1.742559 |
| POLR3A  | 0.412866 | 1.155252 | 0.817821 | 1.631904 |
| DBF4B   | 0.189017 | 1.201876 | 0.913471 | 1.581337 |

|          |          |          |          |          |
|----------|----------|----------|----------|----------|
| GLE1     | 0.568222 | 1.117547 | 0.762953 | 1.636944 |
| PN01     | 0.134067 | 1.292401 | 0.923999 | 1.807687 |
| ILKAP    | 0.537659 | 1.161771 | 0.721178 | 1.871538 |
| FASTKD2  | 0.226978 | 1.312323 | 0.844403 | 2.039536 |
| SRSF3    | 0.78181  | 1.077286 | 0.636113 | 1.824432 |
| MRPL44   | 0.022931 | 1.791766 | 1.084011 | 2.961617 |
| NUDT5    | 0.70919  | 1.069775 | 0.750498 | 1.524878 |
| H2AFY2   | 0.375375 | 1.078451 | 0.912594 | 1.274452 |
| PCNX3    | 0.065389 | 1.37986  | 0.979699 | 1.943468 |
| MAPK1    | 0.416527 | 1.16182  | 0.809095 | 1.668315 |
| OLA1     | 0.007908 | 1.673059 | 1.144385 | 2.445965 |
| C12orf43 | 0.090067 | 1.595531 | 0.929583 | 2.73856  |
| HMGCS1   | 0.055232 | 1.231043 | 0.995357 | 1.522535 |
| M6PR     | 0.51488  | 1.10243  | 0.822045 | 1.478448 |
| TPI1     | 0.001207 | 1.704135 | 1.234059 | 2.353273 |
| DUT      | 0.023371 | 1.597412 | 1.065552 | 2.394745 |
| PMS2     | 0.81141  | 1.04271  | 0.739545 | 1.470153 |
| TAF13    | 0.311408 | 1.173192 | 0.861106 | 1.598385 |
| PIGU     | 0.153456 | 1.290181 | 0.909326 | 1.830552 |
| CERS5    | 0.424376 | 1.220356 | 0.748676 | 1.989204 |
| PREB     | 0.202906 | 1.332495 | 0.856589 | 2.072806 |
| PPM1G    | 0.011864 | 1.667508 | 1.119666 | 2.483405 |
| PROSER3  | 0.152787 | 1.237924 | 0.923902 | 1.658678 |
| NSF      | 0.65411  | 1.080874 | 0.769186 | 1.518865 |
| PSMC6    | 0.024755 | 1.589969 | 1.060681 | 2.383375 |
| SLC35A5  | 0.608371 | 1.104955 | 0.754307 | 1.618606 |
| BTBD3    | 0.082724 | 1.273242 | 0.969178 | 1.672702 |
| DLG5     | 0.169875 | 1.161152 | 0.938065 | 1.437291 |
| PAICS    | 0.001392 | 1.572522 | 1.19137  | 2.075614 |
| ADO      | 0.992857 | 0.997879 | 0.626853 | 1.588508 |
| AP2S1    | 0.000606 | 1.964352 | 1.335436 | 2.889453 |
| RBPMS2   | 0.172505 | 1.124879 | 0.949908 | 1.332079 |
| NDUFA9   | 0.05495  | 1.431118 | 0.992429 | 2.063723 |
| SNX5     | 0.318522 | 0.8077   | 0.530894 | 1.228831 |
| TAF5     | 0.069163 | 1.45216  | 0.971151 | 2.171411 |
| RAD51AP1 | 0.054038 | 1.194795 | 0.996916 | 1.431951 |
| ALKBH2   | 0.9409   | 0.987224 | 0.702729 | 1.386895 |
| LDLRAD3  | 0.007331 | 1.340017 | 1.081931 | 1.659666 |
| VRK1     | 0.373047 | 1.13652  | 0.857615 | 1.506128 |
| ZNF367   | 0.024653 | 1.298741 | 1.033933 | 1.631371 |
| PSMD9    | 0.04937  | 1.612311 | 1.001318 | 2.596126 |
| MRPS22   | 0.013998 | 1.662568 | 1.108372 | 2.493866 |
| PCMT1    | 0.070978 | 1.423803 | 0.970249 | 2.089375 |
| CDKN2C   | 0.767427 | 1.035356 | 0.822406 | 1.303445 |
| CD3EAP   | 0.003247 | 1.555559 | 1.159067 | 2.087682 |
| EMG1     | 0.429361 | 1.178409 | 0.78429  | 1.770581 |
| NIPSNAP1 | 0.746193 | 1.045376 | 0.799036 | 1.367662 |
| TBC1D23  | 0.940075 | 1.014926 | 0.689729 | 1.49345  |
| STRN3    | 0.235436 | 1.215339 | 0.88061  | 1.677303 |
| UBE2R2   | 0.046678 | 1.501578 | 1.005995 | 2.241301 |
| E2F7     | 0.000474 | 1.385447 | 1.153942 | 1.663397 |
| ZNF300   | 0.611742 | 1.053046 | 0.862523 | 1.285654 |
| CENPO    | 0.01692  | 1.422961 | 1.065326 | 1.900657 |
| SPDL1    | 0.001578 | 1.596228 | 1.19433  | 2.133367 |

|           |          |          |          |          |
|-----------|----------|----------|----------|----------|
| TIMM21    | 0.071301 | 1.494668 | 0.965747 | 2.313268 |
| JPT1      | 0.008343 | 1.463262 | 1.102774 | 1.941591 |
| TPRKB     | 0.08766  | 1.392466 | 0.952306 | 2.03607  |
| FAM104A   | 0.008009 | 1.819721 | 1.169029 | 2.832594 |
| ZC3H15    | 0.00727  | 1.77005  | 1.166574 | 2.685709 |
| HDAC1     | 0.136961 | 1.364935 | 0.905837 | 2.056715 |
| UTP4      | 0.060897 | 1.501698 | 0.981576 | 2.297425 |
| UMPS      | 0.077455 | 1.405404 | 0.963239 | 2.050541 |
| CDKN3     | 0.002597 | 1.29768  | 1.095277 | 1.537486 |
| USP28     | 0.687269 | 1.064049 | 0.786489 | 1.439563 |
| CHAF1A    | 0.026739 | 1.337415 | 1.034079 | 1.72973  |
| PHF6      | 0.690123 | 1.070019 | 0.767187 | 1.492389 |
| KPTN      | 0.183442 | 1.219898 | 0.910195 | 1.63498  |
| PRTFDC1   | 0.575634 | 1.062604 | 0.859084 | 1.31434  |
| SLC15A4   | 0.21451  | 1.33463  | 0.846086 | 2.105267 |
| SEC23B    | 0.313039 | 1.175081 | 0.858904 | 1.607649 |
| PSMC5     | 0.00523  | 1.998297 | 1.229245 | 3.248492 |
| CENPU     | 0.002036 | 1.361062 | 1.118972 | 1.655529 |
| ABCE1     | 0.1161   | 1.301191 | 0.936964 | 1.807005 |
| MARK2     | 0.02939  | 1.49436  | 1.041069 | 2.145018 |
| ACPP      | 0.213166 | 0.856008 | 0.67015  | 1.093412 |
| TTC7B     | 0.543953 | 0.879693 | 0.581479 | 1.330847 |
| CDT1      | 0.002584 | 1.314672 | 1.100358 | 1.570727 |
| TRIM37    | 0.359372 | 1.151039 | 0.852032 | 1.554976 |
| TDP1      | 0.214642 | 1.191743 | 0.903347 | 1.572211 |
| PTTG1     | 0.007774 | 1.292928 | 1.070082 | 1.562182 |
| VPS37C    | 0.70295  | 1.075771 | 0.739078 | 1.565846 |
| SMARCAL1  | 0.006439 | 2.111164 | 1.233299 | 3.613898 |
| CCDC85C   | 0.090137 | 1.335995 | 0.955666 | 1.867684 |
| ARHGAP11A | 0.000526 | 1.412125 | 1.161855 | 1.716306 |
| DNTTIP2   | 0.127103 | 1.364888 | 0.915248 | 2.035426 |
| HENMT1    | 0.644432 | 0.958125 | 0.79896  | 1.148998 |
| ANAPC13   | 0.302329 | 1.265253 | 0.809133 | 1.978493 |
| CTBP2     | 0.222875 | 1.269187 | 0.86509  | 1.862044 |
| KIF1BP    | 0.078874 | 1.392031 | 0.962564 | 2.013114 |
| LSM12     | 0.299826 | 1.203107 | 0.8482   | 1.706517 |
| TCF19     | 0.171956 | 1.154568 | 0.93941  | 1.419005 |
| RPE       | 0.005315 | 1.713489 | 1.173334 | 2.502309 |
| RAD51     | 0.001519 | 1.413204 | 1.141206 | 1.750031 |
| RAB18     | 0.368957 | 1.200757 | 0.805601 | 1.78974  |
| MAZ       | 0.225049 | 1.247241 | 0.872852 | 1.782215 |
| NAIF1     | 0.812662 | 1.061099 | 0.649757 | 1.73285  |
| CCNB2     | 0.003516 | 1.312164 | 1.093339 | 1.574785 |
| EHHADH    | 0.369839 | 1.134965 | 0.860626 | 1.496755 |
| KNTC1     | 0.080633 | 1.24603  | 0.973546 | 1.59478  |
| PIF1      | 0.162876 | 1.17556  | 0.936665 | 1.475386 |
| NCAPH     | 0.021042 | 1.220872 | 1.030493 | 1.446423 |
| MICALL1   | 0.152663 | 1.233125 | 0.925313 | 1.643334 |
| KIF21A    | 0.201542 | 1.168836 | 0.919979 | 1.48501  |
| GDI2      | 0.920438 | 1.020379 | 0.686809 | 1.515957 |
| INTS1     | 0.024377 | 1.330105 | 1.037586 | 1.705091 |
| PAFAH1B2  | 0.001223 | 1.870872 | 1.279792 | 2.734947 |
| RNF41     | 0.63819  | 0.899484 | 0.578406 | 1.398793 |
| PCGF6     | 0.451876 | 1.144283 | 0.805443 | 1.625669 |



|          |          |          |          |          |
|----------|----------|----------|----------|----------|
| NBN      | 0.021643 | 1.427758 | 1.053581 | 1.934823 |
| HSPA4    | 0.013445 | 1.677847 | 1.113106 | 2.529112 |
| TIMELESS | 0.050277 | 1.251208 | 0.999729 | 1.565946 |
| DLL1     | 0.926956 | 1.010031 | 0.815949 | 1.250276 |
| AGMAT    | 0.120865 | 1.195725 | 0.953982 | 1.498726 |
| EIF3M    | 0.022082 | 1.693875 | 1.078693 | 2.659897 |
| KIF23    | 0.002729 | 1.313438 | 1.09892  | 1.569832 |
| GMPS     | 0.000629 | 1.618564 | 1.228112 | 2.133153 |
| POLD3    | 0.444354 | 1.145044 | 0.809263 | 1.620149 |
| ICMT     | 0.121707 | 1.344616 | 0.924144 | 1.956397 |
| FIBP     | 0.51415  | 1.165195 | 0.736068 | 1.844504 |
| IWS1     | 0.150502 | 1.348496 | 0.897094 | 2.027037 |
| SLC22A3  | 0.491882 | 0.960665 | 0.856791 | 1.077134 |
| YKT6     | 0.011729 | 1.550007 | 1.102328 | 2.179498 |
| NOC3L    | 0.533706 | 1.124428 | 0.777204 | 1.626779 |
| FTSJ1    | 0.103282 | 1.405973 | 0.93315  | 2.118374 |
| DLD      | 0.063223 | 1.426028 | 0.980638 | 2.073707 |
| CCNE2    | 0.272782 | 1.135499 | 0.904812 | 1.425001 |
| PSMB1    | 0.062441 | 1.390016 | 0.983034 | 1.965491 |
| SMS      | 0.003273 | 1.520368 | 1.149973 | 2.010062 |
| ZNF496   | 0.910693 | 1.020173 | 0.719629 | 1.446234 |
| SLIRP    | 0.25057  | 1.272585 | 0.843543 | 1.919847 |
| IPPK     | 0.024712 | 1.545179 | 1.056959 | 2.258912 |
| SNAP29   | 0.332167 | 1.268007 | 0.784701 | 2.048989 |
| UBE2G1   | 0.014923 | 1.612447 | 1.097555 | 2.36889  |
| ERH      | 0.261758 | 1.260096 | 0.841496 | 1.886929 |
| RAD51D   | 0.720429 | 1.077712 | 0.715322 | 1.623692 |
| GPR3     | 0.940579 | 1.011002 | 0.758248 | 1.348008 |
| CRKL     | 0.10306  | 1.365104 | 0.938983 | 1.984602 |
| NUSAP1   | 0.007087 | 1.290256 | 1.071809 | 1.553225 |
| ARID3A   | 0.323372 | 1.130344 | 0.88635  | 1.441505 |
| C2orf49  | 0.777529 | 1.066654 | 0.681751 | 1.668867 |
| POLR3G   | 0.012959 | 1.387443 | 1.071623 | 1.796338 |
| ADCY3    | 0.657053 | 1.05994  | 0.819743 | 1.370518 |
| NT5DC2   | 0.430519 | 0.88909  | 0.663757 | 1.190919 |
| PRPSAP1  | 0.098323 | 1.40964  | 0.938242 | 2.117882 |
| SMO      | 0.351124 | 1.095347 | 0.904508 | 1.326449 |
| DCUN1D1  | 0.008758 | 1.520681 | 1.111553 | 2.080396 |
| METAP2   | 0.219872 | 1.266143 | 0.868487 | 1.845875 |
| PLBD2    | 0.325993 | 1.173015 | 0.853123 | 1.612855 |
| NUFIP1   | 0.0455   | 1.538603 | 1.008662 | 2.34697  |
| SUMO1    | 0.160523 | 1.413705 | 0.871681 | 2.292767 |
| CHFR     | 0.338422 | 1.232366 | 0.803448 | 1.890261 |
| XP06     | 0.397371 | 1.187759 | 0.797386 | 1.769247 |
| C4orf46  | 0.446523 | 1.117326 | 0.839709 | 1.486728 |
| SIAH2    | 0.021801 | 1.466621 | 1.05732  | 2.034368 |
| POLR3D   | 0.226322 | 1.266311 | 0.863832 | 1.856315 |
| RASL10B  | 0.91814  | 1.009256 | 0.846632 | 1.203117 |
| FGD1     | 0.15116  | 1.207477 | 0.933429 | 1.561983 |
| HNRNPAB  | 0.026657 | 1.56098  | 1.052893 | 2.314252 |
| DDX11    | 0.070715 | 1.240186 | 0.981982 | 1.566282 |
| SNW1     | 0.126342 | 1.411401 | 0.907362 | 2.195432 |
| NDUFAF5  | 0.904255 | 0.974394 | 0.638518 | 1.486948 |
| BAG2     | 0.147053 | 1.165857 | 0.947463 | 1.434594 |

|          |          |          |          |          |
|----------|----------|----------|----------|----------|
| SAMD4B   | 0.03851  | 1.377357 | 1.017074 | 1.865266 |
| SKP2     | 0.319634 | 1.117608 | 0.897818 | 1.391204 |
| DBN1     | 0.088319 | 1.235844 | 0.968738 | 1.576599 |
| TSPYL5   | 0.303072 | 0.927176 | 0.802913 | 1.070672 |
| PARD6G   | 0.534876 | 0.919039 | 0.703935 | 1.199873 |
| MRPS5    | 0.089572 | 1.450091 | 0.944198 | 2.227037 |
| TBC1D31  | 0.002591 | 1.548    | 1.164939 | 2.057021 |
| CDCA7L   | 0.615176 | 0.952487 | 0.787833 | 1.151555 |
| TRIP4    | 0.027156 | 1.606772 | 1.054973 | 2.447188 |
| CENPBD1  | 0.20072  | 1.229423 | 0.895974 | 1.686969 |
| NXPE3    | 0.266859 | 0.840228 | 0.617934 | 1.14249  |
| VCP      | 0.054346 | 1.493081 | 0.992549 | 2.246025 |
| TBC1D1   | 0.51284  | 1.091928 | 0.839082 | 1.420966 |
| ARL4C    | 0.375623 | 1.110675 | 0.880523 | 1.400986 |
| NEPRO    | 0.639415 | 1.125175 | 0.686988 | 1.842856 |
| ATAD2    | 0.021561 | 1.26199  | 1.034822 | 1.539026 |
| YY1      | 0.40057  | 1.246792 | 0.745485 | 2.085205 |
| GFM2     | 0.149579 | 1.310721 | 0.907156 | 1.893821 |
| MB21D2   | 0.101111 | 1.214416 | 0.962739 | 1.531887 |
| CDK1     | 0.004652 | 1.269182 | 1.076048 | 1.49698  |
| YME1L1   | 0.06827  | 1.44832  | 0.972602 | 2.156723 |
| APEX1    | 0.854211 | 1.035889 | 0.711172 | 1.508869 |
| TARBP2   | 0.254859 | 1.253152 | 0.849778 | 1.848001 |
| HSPD1    | 0.002603 | 1.545196 | 1.164054 | 2.051134 |
| KPNA4    | 0.012718 | 1.623433 | 1.108915 | 2.376678 |
| FUCA2    | 0.011487 | 1.482111 | 1.092374 | 2.010898 |
| UQCC1    | 0.334856 | 1.232688 | 0.805762 | 1.885816 |
| LRP8     | 0.074373 | 1.233279 | 0.979571 | 1.552697 |
| TOMM34   | 0.185701 | 1.253384 | 0.89706  | 1.751245 |
| RIMKLA   | 0.212296 | 0.883426 | 0.72708  | 1.073391 |
| WWTR1    | 0.833518 | 0.971952 | 0.745483 | 1.26722  |
| KNOP1    | 0.091155 | 1.384054 | 0.949265 | 2.017989 |
| PMAIP1   | 0.006905 | 1.233623 | 1.059317 | 1.436611 |
| GINS2    | 0.011034 | 1.281143 | 1.058338 | 1.550853 |
| MFN1     | 0.363022 | 1.178581 | 0.827182 | 1.67926  |
| TMEM38B  | 0.036294 | 1.263747 | 1.015056 | 1.573369 |
| GOSR2    | 0.958264 | 1.011215 | 0.665942 | 1.535504 |
| PSMA4    | 0.011039 | 1.641756 | 1.120118 | 2.406322 |
| PIMREG   | 0.006769 | 1.276616 | 1.069786 | 1.523435 |
| DHX33    | 0.164496 | 1.280033 | 0.903745 | 1.812994 |
| DCK      | 0.703537 | 1.055545 | 0.799031 | 1.394408 |
| ZNF146   | 0.022042 | 1.382148 | 1.047702 | 1.823355 |
| THOC3    | 0.172559 | 1.264041 | 0.902695 | 1.770035 |
| KIAA2013 | 0.376325 | 1.255591 | 0.758327 | 2.078929 |
| PXMP2    | 0.351363 | 1.154132 | 0.853743 | 1.560214 |
| MSL1     | 0.50225  | 1.125574 | 0.796713 | 1.590181 |
| DARS2    | 0.020606 | 1.378568 | 1.050484 | 1.80912  |
| ESCO2    | 0.03538  | 1.324363 | 1.019416 | 1.720533 |
| RHEBL1   | 0.863678 | 0.97778  | 0.756553 | 1.263697 |
| RTCA     | 0.240295 | 1.274798 | 0.850055 | 1.91177  |
| WDCP     | 0.990743 | 0.997552 | 0.659356 | 1.509214 |
| DRAP1    | 0.286153 | 1.206176 | 0.854697 | 1.702194 |
| LRFN4    | 0.011433 | 1.292514 | 1.059447 | 1.576853 |
| SUPT16H  | 0.293051 | 1.206316 | 0.85038  | 1.711232 |

|          |          |          |          |          |
|----------|----------|----------|----------|----------|
| BEND3    | 0.912008 | 1.017795 | 0.744377 | 1.391642 |
| BRAP     | 0.305842 | 1.27323  | 0.80188  | 2.021642 |
| SCFD1    | 0.296603 | 1.243623 | 0.825811 | 1.872825 |
| FECH     | 0.089108 | 1.287835 | 0.962075 | 1.723898 |
| BZW2     | 0.065513 | 1.301045 | 0.983249 | 1.721555 |
| NT5C3A   | 0.026372 | 1.402529 | 1.040515 | 1.890494 |
| CKAP2    | 0.070416 | 1.25546  | 0.981224 | 1.606341 |
| CDCA8    | 0.027519 | 1.234706 | 1.023625 | 1.489313 |
| CPSF3    | 0.127944 | 1.363291 | 0.914747 | 2.031775 |
| PARD3    | 0.307623 | 1.145522 | 0.882371 | 1.487153 |
| MRPL37   | 0.025428 | 1.53324  | 1.053973 | 2.230442 |
| PPP3R1   | 0.511211 | 1.156713 | 0.749199 | 1.785889 |
| RBMX2    | 0.724322 | 1.081613 | 0.699402 | 1.672697 |
| WDR45B   | 0.984493 | 1.003051 | 0.737744 | 1.363768 |
| MOCS3    | 0.399775 | 1.199984 | 0.785019 | 1.834302 |
| WTAP     | 0.19678  | 1.355426 | 0.854137 | 2.150921 |
| DNAAF2   | 0.298049 | 0.817174 | 0.558681 | 1.195268 |
| C17orf53 | 0.088426 | 1.189308 | 0.974266 | 1.451814 |
| DERL1    | 0.036144 | 1.495438 | 1.026334 | 2.178955 |
| SNRNP48  | 0.769861 | 1.04893  | 0.761652 | 1.444564 |
| PAXIP1   | 0.375216 | 1.166786 | 0.8297   | 1.640822 |
| NARS2    | 0.615193 | 0.920461 | 0.666285 | 1.271601 |
| ZNF286A  | 0.345546 | 1.195527 | 0.824902 | 1.732673 |
| ELP4     | 0.148232 | 1.399777 | 0.887276 | 2.208306 |
| FOLR1    | 0.38542  | 0.960136 | 0.875866 | 1.052514 |
| MSH6     | 0.139905 | 1.241034 | 0.931669 | 1.653126 |
| FAM222A  | 0.073877 | 1.231213 | 0.980116 | 1.54664  |
| GEMIN2   | 0.935498 | 0.988499 | 0.746977 | 1.308112 |
| SCD      | 0.084362 | 1.157663 | 0.980343 | 1.367056 |
| MEA1     | 0.755729 | 1.06569  | 0.713757 | 1.591151 |
| LMNB1    | 0.030262 | 1.263061 | 1.022528 | 1.560175 |
| DHX57    | 0.866896 | 1.033268 | 0.704701 | 1.51503  |
| SNAPC5   | 0.077135 | 1.464749 | 0.959304 | 2.236508 |
| CENPQ    | 0.192726 | 1.202566 | 0.911105 | 1.587264 |
| ZNF131   | 0.863691 | 0.970804 | 0.692178 | 1.361587 |
| RBM28    | 0.599737 | 1.114213 | 0.743961 | 1.668729 |
| NONO     | 0.899614 | 1.02286  | 0.71995  | 1.453217 |
| PWP1     | 0.151147 | 1.382649 | 0.888361 | 2.15196  |
| CKAP2L   | 0.003221 | 1.321422 | 1.097764 | 1.590647 |
| LRRC8D   | 0.45631  | 0.870746 | 0.604982 | 1.253257 |
| CLSPN    | 0.019376 | 1.262154 | 1.038381 | 1.534149 |
| NUDT3    | 0.75511  | 1.074958 | 0.682551 | 1.692964 |
| PRR3     | 0.213769 | 0.794471 | 0.552784 | 1.141829 |
| FBL      | 0.06368  | 1.399303 | 0.981058 | 1.995855 |
| MKKS     | 0.371041 | 1.201188 | 0.803855 | 1.794917 |
| MEX3B    | 0.788816 | 0.960262 | 0.713722 | 1.291966 |
| SAP30BP  | 0.080214 | 1.538528 | 0.949478 | 2.493021 |
| SAC3D1   | 0.007989 | 1.574225 | 1.125778 | 2.20131  |
| EMC1     | 0.333533 | 1.184963 | 0.840078 | 1.671438 |
| TLE1     | 0.000316 | 1.681159 | 1.267199 | 2.230347 |
| RAD21    | 0.675929 | 1.061081 | 0.803568 | 1.401117 |
| ZNF229   | 0.014054 | 1.252084 | 1.046441 | 1.498139 |
| NEDD1    | 0.006527 | 1.609507 | 1.142245 | 2.267915 |
| TBCCD1   | 0.054132 | 1.36431  | 0.994501 | 1.871634 |

|          |          |          |          |          |
|----------|----------|----------|----------|----------|
| SUCLA2   | 0.022137 | 1.50736  | 1.0606   | 2.142308 |
| ERO1A    | 0.000293 | 1.474353 | 1.194949 | 1.819086 |
| TIMM23   | 0.029632 | 1.626939 | 1.04929  | 2.522592 |
| AGPS     | 0.00388  | 1.732933 | 1.193214 | 2.516781 |
| C20orf27 | 0.890505 | 0.978396 | 0.716925 | 1.33523  |
| SLC25A3  | 0.24772  | 1.301392 | 0.832562 | 2.034227 |
| CDK5RAP1 | 0.70582  | 1.078864 | 0.727433 | 1.600075 |
| VBP1     | 0.114519 | 1.287399 | 0.940721 | 1.761837 |
| MYO10    | 0.244256 | 0.862482 | 0.672362 | 1.106361 |
| TIMM17A  | 0.009996 | 1.700262 | 1.135338 | 2.546283 |
| NUP43    | 0.063992 | 1.495022 | 0.976883 | 2.287981 |
| ORC4     | 0.595724 | 0.883147 | 0.558048 | 1.397638 |
| TUBGCP3  | 0.032025 | 1.468525 | 1.033551 | 2.086559 |
| SEN2     | 0.014582 | 1.467329 | 1.07871  | 1.995954 |
| NCBP1    | 0.013856 | 1.62739  | 1.104221 | 2.398431 |
| ATG3     | 0.447032 | 1.194876 | 0.755115 | 1.890743 |
| MAP2K1   | 0.003519 | 1.773773 | 1.207077 | 2.606519 |
| SUPT3H   | 0.498611 | 0.872247 | 0.58709  | 1.295908 |
| VDAC3    | 0.03464  | 1.338752 | 1.021294 | 1.754889 |
| RAD23B   | 0.002673 | 1.758267 | 1.216544 | 2.541218 |
| KIF3B    | 0.172113 | 1.248068 | 0.908024 | 1.715454 |
| TRERF1   | 0.370933 | 1.127269 | 0.867077 | 1.465538 |
| HCFC1    | 0.083075 | 1.326081 | 0.963734 | 1.824665 |
| PDHX     | 0.075698 | 1.374187 | 0.967652 | 1.951519 |
| ARCN1    | 0.010547 | 1.559748 | 1.109423 | 2.192863 |
| CNIH2    | 0.320349 | 1.117753 | 0.897415 | 1.392189 |
| CYREN    | 0.003824 | 1.942226 | 1.238615 | 3.045534 |
| METAP1   | 0.050358 | 1.514006 | 0.999353 | 2.293699 |
| AMN1     | 0.011112 | 1.575945 | 1.109328 | 2.238837 |
| CFL1     | 0.003721 | 2.041855 | 1.260553 | 3.307416 |
| KHDRBS1  | 0.056848 | 1.573079 | 0.986887 | 2.507455 |
| FOXRED2  | 0.679446 | 0.956461 | 0.774406 | 1.181315 |
| VSIG10   | 0.924859 | 0.988011 | 0.768971 | 1.269446 |
| HAUS6    | 0.225785 | 1.218006 | 0.885241 | 1.675859 |
| CASP6    | 0.720636 | 1.067573 | 0.746032 | 1.527699 |
| MTX2     | 0.038779 | 1.549298 | 1.022832 | 2.346742 |
| YBX1     | 0.164107 | 1.307854 | 0.896127 | 1.908749 |
| B3GALNT1 | 0.035092 | 1.242583 | 1.015301 | 1.520744 |
| MTMR2    | 0.003309 | 1.649523 | 1.181219 | 2.30349  |
| SNF8     | 0.026394 | 1.683959 | 1.063027 | 2.667589 |
| GTPBP4   | 0.154241 | 1.257477 | 0.917527 | 1.72338  |
| MMADHC   | 0.007126 | 1.689875 | 1.153171 | 2.47637  |
| PUS3     | 0.961387 | 1.010829 | 0.653579 | 1.563354 |
| KPNA3    | 0.096529 | 1.328248 | 0.950367 | 1.856382 |
| 5-Mar    | 0.127531 | 1.354678 | 0.916803 | 2.001687 |
| POFUT1   | 0.179096 | 1.269959 | 0.896151 | 1.799691 |
| KIFC1    | 0.031701 | 1.205595 | 1.016515 | 1.429844 |
| ALG3     | 0.003211 | 1.613338 | 1.173717 | 2.217623 |
| NUDC     | 0.02828  | 1.587371 | 1.050402 | 2.398839 |
| TAF2     | 0.09841  | 1.286191 | 0.95427  | 1.733563 |
| GLMN     | 0.7879   | 0.952684 | 0.669252 | 1.356151 |
| ATP6V1C1 | 0.508907 | 1.127962 | 0.789089 | 1.612363 |
| SKA3     | 0.001654 | 1.367655 | 1.125301 | 1.662205 |
| TRMT10C  | 0.727653 | 1.067688 | 0.738512 | 1.543588 |

|          |          |          |          |          |
|----------|----------|----------|----------|----------|
| VPS33B   | 0.171275 | 1.386857 | 0.868075 | 2.215675 |
| NUF2     | 0.058146 | 1.174826 | 0.994456 | 1.387909 |
| RNASE1   | 0.000185 | 0.755522 | 0.652264 | 0.875127 |
| AZIN1    | 0.349248 | 1.157301 | 0.852311 | 1.571428 |
| HDHD5    | 0.241642 | 0.803462 | 0.557039 | 1.158896 |
| TFRC     | 0.05247  | 1.17632  | 0.998268 | 1.386131 |
| PPP2R5D  | 0.408984 | 1.166704 | 0.809119 | 1.682321 |
| POT1     | 0.398995 | 1.153    | 0.828225 | 1.60513  |
| C16orf89 | 0.014214 | 0.907718 | 0.840112 | 0.980765 |
| PITPNB   | 0.411893 | 1.197065 | 0.778986 | 1.839524 |
| SLC16A1  | 0.014606 | 1.192729 | 1.035402 | 1.373962 |
| FXN      | 0.891072 | 1.033845 | 0.642059 | 1.6647   |
| CHD7     | 0.417177 | 0.897856 | 0.692095 | 1.16479  |
| KIF20B   | 0.014056 | 1.360477 | 1.06413  | 1.739353 |
| RNF26    | 0.086633 | 1.307367 | 0.962171 | 1.776406 |
| TPD52L2  | 0.103066 | 1.412113 | 0.932567 | 2.138252 |
| RNASEH1  | 0.095795 | 1.363404 | 0.946687 | 1.963553 |
| CEP55    | 0.008448 | 1.258119 | 1.060492 | 1.492574 |
| UBE2E3   | 0.024337 | 1.456731 | 1.049958 | 2.021096 |
| PFAS     | 0.713091 | 1.05951  | 0.778555 | 1.441852 |
| PHB      | 0.123774 | 1.366435 | 0.918177 | 2.033537 |
| MASTL    | 0.041385 | 1.332611 | 1.011282 | 1.756039 |
| RPP38    | 0.891018 | 1.036199 | 0.623065 | 1.72327  |
| RDH11    | 0.147162 | 1.30552  | 0.910414 | 1.872097 |
| HAUS1    | 0.245617 | 1.202104 | 0.881036 | 1.640175 |
| DEK      | 0.305535 | 1.158773 | 0.874138 | 1.536092 |
| YWHAZ    | 0.026931 | 1.451038 | 1.04341  | 2.017914 |
| STAM     | 0.138201 | 1.335486 | 0.911042 | 1.957673 |
| KTI12    | 0.582486 | 0.887291 | 0.579314 | 1.358996 |
| C17orf75 | 0.677041 | 0.924362 | 0.638415 | 1.338385 |
| FAM98A   | 0.042323 | 1.614291 | 1.016737 | 2.563039 |
| LYPLA1   | 0.238539 | 1.136616 | 0.918616 | 1.40635  |
| TTF1     | 0.310263 | 1.230494 | 0.824289 | 1.836876 |
| KMT5A    | 0.016788 | 1.561476 | 1.083704 | 2.249884 |
| RPF1     | 0.461208 | 1.17344  | 0.766836 | 1.795639 |
| BUD13    | 0.334964 | 1.210214 | 0.821143 | 1.783634 |
| MAPRE1   | 0.045604 | 1.489226 | 1.007815 | 2.200595 |
| SERBP1   | 0.063668 | 1.497625 | 0.977293 | 2.294991 |
| ITGB1    | 0.010874 | 1.401907 | 1.080946 | 1.81817  |
| TIMM9    | 0.395899 | 1.168834 | 0.815334 | 1.675599 |
| HNRNPR   | 0.008811 | 1.740579 | 1.149713 | 2.635105 |
| BUB1     | 0.009936 | 1.265737 | 1.058123 | 1.514086 |
| E2F4     | 0.084912 | 1.489582 | 0.946638 | 2.343931 |
| MAP3K20  | 0.075432 | 1.279172 | 0.975091 | 1.678079 |
| PDSS1    | 0.145408 | 1.29005  | 0.91561  | 1.817617 |
| NIFK     | 0.361176 | 1.165697 | 0.838811 | 1.619971 |
| CCDC43   | 0.425004 | 1.161018 | 0.80453  | 1.675464 |
| PDCD11   | 0.312144 | 1.174863 | 0.859551 | 1.605844 |
| NOP58    | 0.107757 | 1.397747 | 0.92941  | 2.102082 |
| TUBA1B   | 0.033614 | 1.326274 | 1.022132 | 1.720917 |
| DNAJC9   | 0.013013 | 1.525918 | 1.093161 | 2.129993 |
| METTL8   | 0.372356 | 1.224112 | 0.785    | 1.908853 |
| SSB      | 0.016804 | 1.624756 | 1.091432 | 2.418685 |
| P4HA1    | 0.077233 | 1.253342 | 0.975638 | 1.610091 |

|          |          |          |          |          |
|----------|----------|----------|----------|----------|
| DBR1     | 0.394714 | 1.202016 | 0.786843 | 1.836252 |
| UBE2T    | 0.01685  | 1.252623 | 1.041357 | 1.506749 |
| MLF1     | 0.620327 | 0.944712 | 0.754352 | 1.18311  |
| ATP5MC3  | 0.008015 | 1.574664 | 1.125708 | 2.202673 |
| SNAPC1   | 0.873444 | 1.028823 | 0.725259 | 1.459446 |
| HSDL1    | 0.152247 | 0.785752 | 0.564842 | 1.093059 |
| DDX51    | 0.52525  | 0.893523 | 0.631329 | 1.264607 |
| MNAT1    | 0.168823 | 1.313015 | 0.890855 | 1.935229 |
| GTF3C5   | 0.087555 | 1.357519 | 0.955997 | 1.927682 |
| ZNF697   | 0.121278 | 1.242887 | 0.944017 | 1.636378 |
| MCM8     | 0.098555 | 1.227354 | 0.962516 | 1.565063 |
| C12orf73 | 0.745631 | 1.070264 | 0.710093 | 1.613119 |
| GNL1     | 0.784374 | 0.948528 | 0.64962  | 1.38497  |
| CLP1     | 0.743492 | 1.087272 | 0.658705 | 1.794674 |
| TRUB1    | 0.636179 | 1.070071 | 0.808255 | 1.416695 |
| SPC25    | 0.002064 | 1.370439 | 1.121486 | 1.674657 |
| MRPS18C  | 0.158497 | 1.477257 | 0.858872 | 2.540878 |
| BLMH     | 0.693899 | 1.059564 | 0.794318 | 1.413385 |
| NCAPD3   | 0.127212 | 1.212077 | 0.946648 | 1.551929 |
| SOX12    | 0.726448 | 0.959772 | 0.762554 | 1.207997 |
| POC1A    | 0.027865 | 1.286681 | 1.027798 | 1.610772 |
| TGIF1    | 0.011123 | 1.544767 | 1.104233 | 2.161051 |
| CENPI    | 0.131489 | 1.185391 | 0.950341 | 1.478576 |
| RBL1     | 0.311676 | 1.153917 | 0.874431 | 1.522732 |
| ANAPC10  | 0.932199 | 1.020146 | 0.644325 | 1.615177 |
| PSMD12   | 0.017953 | 1.651506 | 1.090025 | 2.502211 |
| SNRNP40  | 0.389152 | 1.189496 | 0.801382 | 1.765575 |
| UBE2L3   | 0.120505 | 1.450011 | 0.907126 | 2.317794 |
| ALDH18A1 | 0.05052  | 1.381264 | 0.999269 | 1.909284 |
| EIF3J    | 0.00133  | 1.864084 | 1.274367 | 2.726693 |
| NDRG3    | 0.202877 | 1.292156 | 0.87093  | 1.917108 |
| ASCC1    | 0.039177 | 1.621578 | 1.024284 | 2.567176 |
| CHAMP1   | 0.369323 | 1.160762 | 0.838291 | 1.607279 |
| METTL6   | 0.198863 | 1.396165 | 0.839141 | 2.322941 |
| PSMA6    | 0.345603 | 1.153249 | 0.857513 | 1.550977 |
| IPO8     | 0.235209 | 1.241715 | 0.86852  | 1.775268 |
| PSPC1    | 0.370189 | 1.201734 | 0.803996 | 1.796234 |
| EIF5B    | 0.079957 | 1.307048 | 0.968539 | 1.763868 |
| BOP1     | 0.204212 | 1.168388 | 0.918866 | 1.48567  |
| GLRX2    | 0.011954 | 1.621452 | 1.112308 | 2.36365  |
| CDC27    | 0.084656 | 1.398252 | 0.955215 | 2.046771 |
| LRIF1    | 0.794492 | 1.040683 | 0.770916 | 1.40485  |
| NOP9     | 0.694364 | 1.075771 | 0.747313 | 1.548592 |
| DYNC1LI1 | 0.306573 | 1.294754 | 0.789097 | 2.124439 |
| MCTS1    | 0.131039 | 1.321275 | 0.920337 | 1.896879 |
| ARG2     | 0.389728 | 0.919404 | 0.759185 | 1.113437 |
| TM9SF1   | 0.154805 | 1.378954 | 0.885746 | 2.146795 |
| ATP5F1B  | 0.012039 | 1.508165 | 1.09436  | 2.078439 |
| CAPZA1   | 0.093918 | 1.407005 | 0.943581 | 2.098034 |
| SRSF9    | 0.028696 | 1.576408 | 1.048508 | 2.370094 |
| EIF4G1   | 0.003506 | 1.580963 | 1.162456 | 2.150141 |
| HMGCR    | 0.048943 | 1.368749 | 1.001456 | 1.87075  |
| GPI      | 0.000155 | 1.744181 | 1.307365 | 2.326946 |
| DLAT     | 0.038993 | 1.407751 | 1.017429 | 1.947815 |

|          |          |          |          |          |
|----------|----------|----------|----------|----------|
| PLSCR1   | 0.007423 | 1.375971 | 1.08927  | 1.738134 |
| MYNN     | 0.391276 | 1.168994 | 0.818051 | 1.67049  |
| NRM      | 0.43709  | 1.108695 | 0.854657 | 1.438243 |
| GGH      | 0.205681 | 1.095368 | 0.951245 | 1.261327 |
| HASPIN   | 0.008789 | 1.392589 | 1.087024 | 1.784049 |
| CASP2    | 0.541387 | 1.108478 | 0.796499 | 1.542654 |
| KIF20A   | 0.007281 | 1.296918 | 1.07263  | 1.568105 |
| CLPB     | 0.514259 | 1.115313 | 0.803464 | 1.548199 |
| NIP7     | 0.025436 | 1.579751 | 1.05783  | 2.359182 |
| POLR3F   | 0.721988 | 0.934691 | 0.644302 | 1.355958 |
| H3F3B    | 0.27654  | 1.256326 | 0.832906 | 1.894998 |
| GAREM2   | 0.704473 | 1.043304 | 0.838058 | 1.298814 |
| POGLUT3  | 0.096661 | 1.238501 | 0.96227  | 1.594028 |
| NABP2    | 0.219234 | 1.275995 | 0.864939 | 1.882402 |
| NPLOC4   | 0.07097  | 1.44181  | 0.969217 | 2.14484  |
| FOXK1    | 0.334879 | 1.141222 | 0.872505 | 1.492701 |
| NOCT     | 0.040716 | 1.337108 | 1.012348 | 1.766051 |
| CNP      | 0.355666 | 1.187651 | 0.824521 | 1.710707 |
| PUM3     | 0.232496 | 1.199492 | 0.889851 | 1.616878 |
| SHCBP1   | 0.001521 | 1.366347 | 1.126582 | 1.65714  |
| POLR1A   | 0.351493 | 1.160739 | 0.848313 | 1.588228 |
| MRPL45   | 0.425911 | 1.136672 | 0.829244 | 1.558073 |
| RNF114   | 0.511715 | 1.143251 | 0.766433 | 1.705333 |
| MCM10    | 0.018526 | 1.241789 | 1.036988 | 1.487038 |
| HPRT1    | 0.561283 | 1.082695 | 0.828112 | 1.415545 |
| PAIP1    | 0.945411 | 1.010869 | 0.74184  | 1.37746  |
| NDUFB4   | 0.035955 | 1.466152 | 1.025397 | 2.096359 |
| HMG1     | 0.381508 | 1.161644 | 0.830486 | 1.624853 |
| PPME1    | 0.129227 | 1.288608 | 0.928666 | 1.788059 |
| CLTCL1   | 0.760022 | 1.047946 | 0.775947 | 1.415292 |
| PRELID3B | 0.400013 | 1.11962  | 0.860582 | 1.456629 |
| HNRNPD   | 0.044572 | 1.527675 | 1.010329 | 2.309932 |
| SRSF7    | 0.82643  | 0.944996 | 0.569931 | 1.566888 |
| GNL2     | 0.6906   | 0.920839 | 0.613513 | 1.382113 |
| RRM1     | 0.027122 | 1.38203  | 1.037252 | 1.841412 |
| MAFG     | 0.123164 | 1.257899 | 0.939637 | 1.683958 |
| LRP11    | 0.014986 | 1.4154   | 1.069844 | 1.872571 |
| PCNP     | 0.662359 | 1.091779 | 0.736148 | 1.619213 |
| WDHD1    | 0.020934 | 1.296399 | 1.040038 | 1.615952 |
| WDR76    | 0.00825  | 1.380234 | 1.086716 | 1.753032 |
| TESK2    | 0.095772 | 0.747206 | 0.530302 | 1.052829 |
| FSCN1    | 0.001603 | 1.27536  | 1.096525 | 1.483361 |
| RPP40    | 0.151513 | 1.234142 | 0.925779 | 1.645218 |
| RAC3     | 0.833631 | 0.98287  | 0.836518 | 1.154826 |
| COPG1    | 0.039856 | 1.529017 | 1.01988  | 2.292323 |
| ZFPL1    | 0.008543 | 1.771002 | 1.15671  | 2.711524 |
| EEFSEC   | 0.952879 | 0.988064 | 0.66346  | 1.471483 |
| MTBP     | 0.049569 | 1.350639 | 1.000567 | 1.823191 |
| ACTR3B   | 0.520155 | 0.878727 | 0.592571 | 1.30307  |
| ZNF485   | 0.479367 | 0.861603 | 0.570223 | 1.301874 |
| RUVBL2   | 0.000731 | 2.072948 | 1.357948 | 3.164416 |
| HADHA    | 0.111634 | 1.454685 | 0.916725 | 2.308334 |
| PPP1R8   | 0.502738 | 1.191389 | 0.713896 | 1.988257 |
| TRIT1    | 0.659834 | 0.919364 | 0.63226  | 1.336838 |

|          |          |          |          |          |
|----------|----------|----------|----------|----------|
| FANCE    | 0.30733  | 1.152655 | 0.877485 | 1.514117 |
| EXOSC3   | 0.474126 | 1.145887 | 0.789222 | 1.663737 |
| NFRKB    | 0.901588 | 1.018441 | 0.76234  | 1.360578 |
| TBC1D16  | 0.9711   | 0.995257 | 0.769523 | 1.287208 |
| GPR173   | 0.616748 | 0.933672 | 0.713621 | 1.221579 |
| TSEN15   | 0.471432 | 0.877108 | 0.613855 | 1.253257 |
| CMSS1    | 0.58208  | 1.090996 | 0.800061 | 1.487728 |
| DYNC1I2  | 0.058616 | 1.497008 | 0.985406 | 2.274221 |
| SEC23A   | 0.182838 | 1.189768 | 0.92136  | 1.536367 |
| MYBL1    | 0.812813 | 0.970946 | 0.760691 | 1.239315 |
| KPNA1    | 0.019093 | 1.561159 | 1.075657 | 2.265795 |
| UCK2     | 0.018181 | 1.276314 | 1.042394 | 1.562726 |
| HSP90AA1 | 0.099558 | 1.308279 | 0.950221 | 1.801259 |
| NLE1     | 0.817834 | 1.042528 | 0.731433 | 1.485937 |
| WDR34    | 0.059851 | 1.312927 | 0.988769 | 1.743356 |
| GPD2     | 0.033249 | 1.419112 | 1.028191 | 1.958662 |
| KHDC1    | 0.755917 | 0.951169 | 0.693695 | 1.304208 |
| SYNCRIP  | 0.045981 | 1.498306 | 1.00724  | 2.228785 |
| SET      | 0.066954 | 1.415076 | 0.976038 | 2.051602 |
| TRIM28   | 0.004096 | 1.665334 | 1.175632 | 2.35902  |
| B3GNT5   | 0.011832 | 1.343158 | 1.067482 | 1.690028 |
| KDM4D    | 0.347108 | 1.229349 | 0.799354 | 1.890651 |
| PTMA     | 0.135594 | 1.461403 | 0.887929 | 2.405259 |
| NUP88    | 0.051058 | 1.443657 | 0.998312 | 2.087671 |
| DHRS13   | 0.433137 | 1.127659 | 0.835041 | 1.522818 |
| ATF1     | 0.085104 | 1.320816 | 0.962244 | 1.813007 |
| TMEM177  | 0.75707  | 0.946814 | 0.669692 | 1.338611 |
| NUDT21   | 0.063698 | 1.454129 | 0.978889 | 2.160092 |
| BARD1    | 0.093626 | 1.278155 | 0.959366 | 1.702876 |
| DHX36    | 0.021368 | 1.537155 | 1.065866 | 2.216832 |
| RBM14    | 0.075457 | 1.492797 | 0.959749 | 2.321902 |
| ZNF813   | 0.091623 | 1.357128 | 0.95177  | 1.935126 |
| MIS18A   | 0.004987 | 1.50465  | 1.13131  | 2.001194 |
| GTF2E2   | 0.041753 | 1.505219 | 1.015384 | 2.231358 |
| BRPF1    | 0.399726 | 1.186832 | 0.796623 | 1.768177 |
| PPP1CC   | 0.291213 | 1.241009 | 0.831071 | 1.853154 |
| DNAAF5   | 0.036175 | 1.422473 | 1.022968 | 1.978    |
| EPRS     | 0.160573 | 1.267575 | 0.910199 | 1.76527  |
| FAAP24   | 0.001713 | 1.600404 | 1.192843 | 2.147218 |
| EXOSC2   | 0.153111 | 1.333677 | 0.898444 | 1.979751 |
| SGO2     | 0.005427 | 1.399789 | 1.104345 | 1.774272 |
| LARP1    | 0.02821  | 1.438615 | 1.039611 | 1.990758 |
| CDC25A   | 0.002979 | 1.397012 | 1.120405 | 1.741906 |
| STOML2   | 0.182422 | 1.22842  | 0.907841 | 1.662203 |
| PRMT5    | 0.024962 | 1.456328 | 1.048424 | 2.022933 |
| GRWD1    | 0.000172 | 2.495273 | 1.548746 | 4.020277 |
| FAM53C   | 0.984831 | 1.003652 | 0.689276 | 1.461413 |
| IQGAP3   | 0.081125 | 1.169538 | 0.980813 | 1.394578 |
| NAP1L4   | 0.455024 | 1.206694 | 0.737093 | 1.975478 |
| NCL      | 0.020335 | 1.557245 | 1.071173 | 2.263884 |
| RPUSD4   | 0.562204 | 1.130128 | 0.747246 | 1.709194 |
| C12orf29 | 0.16527  | 1.270968 | 0.905821 | 1.783309 |
| STAU1    | 0.098197 | 1.378138 | 0.942321 | 2.015518 |
| MAPK6    | 0.001952 | 1.496744 | 1.15963  | 1.931861 |



|         |          |          |          |          |
|---------|----------|----------|----------|----------|
| LMAN2L  | 0.245801 | 1.257148 | 0.854179 | 1.850222 |
| HEATR6  | 0.848587 | 0.964307 | 0.664009 | 1.400415 |
| LMF1    | 0.211447 | 0.821918 | 0.60428  | 1.117939 |
| SSRP1   | 0.002744 | 1.74695  | 1.212639 | 2.516687 |
| KIF18B  | 0.05102  | 1.172634 | 0.999294 | 1.376041 |
| RAP2B   | 0.308996 | 1.1796   | 0.858089 | 1.621577 |
| UPF3B   | 0.600994 | 1.087339 | 0.794472 | 1.488166 |
| MRPL42  | 0.308561 | 1.220194 | 0.831892 | 1.789745 |
| OBI1    | 0.418587 | 1.181355 | 0.788855 | 1.769144 |
| KIF14   | 0.001467 | 1.378022 | 1.130983 | 1.67902  |
| RANGAP1 | 0.009598 | 1.536864 | 1.110197 | 2.127506 |
| TWINK   | 0.490542 | 1.107988 | 0.827809 | 1.482996 |
| BRCC3   | 0.656531 | 1.080687 | 0.767668 | 1.521341 |
| RALA    | 0.065971 | 1.406179 | 0.977754 | 2.022329 |
| YWHAG   | 0.003772 | 1.616944 | 1.168115 | 2.238227 |
| ZWILCH  | 0.005811 | 1.463742 | 1.116577 | 1.918847 |
| TCFL5   | 0.665721 | 0.929479 | 0.667042 | 1.295167 |
| ARID3B  | 0.717779 | 1.066868 | 0.751055 | 1.515477 |
| BCCIP   | 0.174175 | 1.314478 | 0.886083 | 1.949988 |
| UBA2    | 0.027806 | 1.395602 | 1.037039 | 1.878141 |
| NUP107  | 0.213525 | 1.189693 | 0.904853 | 1.564199 |
| UBE2K   | 0.02237  | 1.532691 | 1.06246  | 2.211041 |
| TSR1    | 0.062654 | 1.390383 | 0.982743 | 1.967111 |
| USP10   | 0.242348 | 1.248825 | 0.860448 | 1.812503 |
| GLA     | 0.369745 | 1.147691 | 0.849374 | 1.550781 |
| ACP1    | 0.088551 | 1.441288 | 0.946359 | 2.195057 |
| ACYP1   | 0.975707 | 0.995451 | 0.742304 | 1.33493  |
| RNF138  | 0.537152 | 0.89788  | 0.637736 | 1.26414  |
| PSMD8   | 0.004511 | 1.616558 | 1.160477 | 2.251884 |
| GNAZ    | 0.167029 | 0.856064 | 0.686709 | 1.067184 |
| NECAP1  | 0.039284 | 1.519126 | 1.020748 | 2.260835 |
| ZDHHC5  | 0.043906 | 1.598378 | 1.01289  | 2.5223   |
| MRPL2   | 0.502474 | 1.138654 | 0.779069 | 1.66421  |
| TTL     | 0.289437 | 1.215464 | 0.847144 | 1.743923 |
| CUL2    | 0.364313 | 1.20439  | 0.805877 | 1.799971 |
| EIF2S2  | 0.003426 | 1.782534 | 1.210382 | 2.625144 |
| ZNF530  | 0.378041 | 1.198262 | 0.801491 | 1.791453 |
| PSMA3   | 0.309807 | 1.214386 | 0.834766 | 1.766642 |
| CDKAL1  | 0.356608 | 0.841561 | 0.583188 | 1.214403 |
| TBC1D15 | 0.722688 | 1.065742 | 0.74977  | 1.514872 |
| PPP2R1B | 0.015729 | 1.34294  | 1.057144 | 1.705998 |
| EI24    | 0.037183 | 1.503857 | 1.024535 | 2.207427 |
| SNX6    | 0.337023 | 1.150926 | 0.863813 | 1.533469 |
| PLOD2   | 0.022025 | 1.185619 | 1.024838 | 1.371623 |
| UTP18   | 0.337921 | 1.188092 | 0.835141 | 1.690209 |
| BMI1    | 0.368647 | 1.158482 | 0.840624 | 1.596528 |
| SRGAP1  | 0.001093 | 1.639039 | 1.218402 | 2.204895 |
| PHF19   | 0.234298 | 1.206038 | 0.885697 | 1.642241 |
| SNX12   | 0.623285 | 1.112787 | 0.726476 | 1.704522 |
| PDK3    | 0.468449 | 1.090355 | 0.862994 | 1.377616 |
| GJC1    | 0.39851  | 1.103144 | 0.878343 | 1.385479 |
| BCL7A   | 0.666923 | 1.071819 | 0.781531 | 1.46993  |
| PHKA1   | 0.018471 | 1.393549 | 1.057373 | 1.836609 |
| NCK1    | 0.187377 | 1.229911 | 0.904197 | 1.672956 |

|          |          |          |          |          |
|----------|----------|----------|----------|----------|
| FAIM     | 0.633124 | 1.107874 | 0.727461 | 1.687218 |
| SEC22A   | 0.784401 | 1.064543 | 0.680093 | 1.666318 |
| C5orf34  | 0.261194 | 1.153333 | 0.899251 | 1.479205 |
| RPN1     | 0.461119 | 1.191719 | 0.747481 | 1.899975 |
| YEATS2   | 0.386554 | 1.136828 | 0.850408 | 1.519714 |
| TPRA1    | 0.84429  | 1.049518 | 0.647936 | 1.699994 |
| ACSL3    | 0.03326  | 1.311569 | 1.021759 | 1.68358  |
| TNFAIP1  | 0.150861 | 1.386543 | 0.887725 | 2.165651 |
| REEP2    | 0.317476 | 0.874638 | 0.672629 | 1.137317 |
| FAM219A  | 0.494536 | 1.140928 | 0.781582 | 1.665488 |
| VDAC1    | 0.000168 | 1.890408 | 1.356846 | 2.633787 |
| POMGNT2  | 0.236719 | 1.20521  | 0.884679 | 1.641874 |
| C10orf88 | 0.822318 | 1.05265  | 0.672655 | 1.647312 |
| BRSK1    | 0.113218 | 0.826974 | 0.653723 | 1.046141 |
| CAND2    | 0.300335 | 0.87893  | 0.688484 | 1.122055 |
| WDR5     | 0.093556 | 1.394478 | 0.945423 | 2.056824 |
| EHBP1    | 0.003746 | 1.50289  | 1.141041 | 1.97949  |
| MARS     | 0.471233 | 1.116102 | 0.827811 | 1.504791 |
| BRI3BP   | 0.022234 | 1.412696 | 1.050557 | 1.899668 |
| LMAN1    | 0.005033 | 1.603524 | 1.152862 | 2.230352 |
| NKRF     | 0.885813 | 1.031689 | 0.673955 | 1.579306 |
| PRMT3    | 0.140549 | 1.355797 | 0.904455 | 2.03237  |
| CALM3    | 0.000894 | 1.876776 | 1.294498 | 2.720969 |
| GTF2F2   | 0.02392  | 1.558441 | 1.060386 | 2.29043  |
| HADHB    | 0.55693  | 1.136832 | 0.741069 | 1.74395  |
| BAZ1A    | 0.804265 | 1.03612  | 0.782601 | 1.371764 |
| NANP     | 0.494629 | 0.88519  | 0.623795 | 1.256119 |
| RBM17    | 0.877744 | 1.035481 | 0.664073 | 1.614613 |
| CWC22    | 0.302721 | 1.252097 | 0.816499 | 1.920084 |
| NDRG4    | 0.596526 | 1.062738 | 0.84838  | 1.331257 |
| URB2     | 0.161294 | 1.276181 | 0.907226 | 1.795185 |
| SAP130   | 0.317244 | 1.20382  | 0.836923 | 1.731561 |
| NIT2     | 0.766869 | 1.065253 | 0.701398 | 1.617861 |
| MED6     | 0.169845 | 1.427789 | 0.858683 | 2.37408  |
| MCM2     | 0.060967 | 1.192058 | 0.991948 | 1.432537 |
| DNAJA1   | 0.128158 | 1.311937 | 0.924721 | 1.861296 |
| C1orf52  | 0.172413 | 0.763144 | 0.517585 | 1.125204 |
| MED30    | 0.793751 | 0.958982 | 0.700563 | 1.312724 |
| LARP6    | 0.01366  | 1.302126 | 1.055675 | 1.606113 |
| KIF18A   | 0.003543 | 1.437043 | 1.126256 | 1.83359  |
| SMN1     | 0.11797  | 1.416069 | 0.915526 | 2.190273 |
| VDAC2    | 0.000264 | 1.906814 | 1.348057 | 2.697172 |
| PSMC1    | 0.014481 | 1.632026 | 1.102066 | 2.416831 |
| NRCAM    | 0.564287 | 0.945372 | 0.781007 | 1.144327 |
| ACTR3    | 0.129259 | 1.31042  | 0.9241   | 1.858241 |
| C12orf66 | 0.253154 | 1.292795 | 0.832218 | 2.00827  |
| PRXL2A   | 0.705817 | 1.068845 | 0.756454 | 1.510245 |
| LARS2    | 0.028853 | 1.545555 | 1.045954 | 2.283791 |
| TFIP11   | 0.682279 | 1.085362 | 0.733241 | 1.606579 |
| EIF3A    | 0.388825 | 1.136148 | 0.849873 | 1.518852 |
| NOL11    | 0.092223 | 1.386048 | 0.947862 | 2.026801 |
| MSH2     | 0.221692 | 1.192756 | 0.899031 | 1.582444 |
| ZNF48    | 0.540913 | 1.12055  | 0.777997 | 1.613931 |
| NUP93    | 0.184628 | 1.29646  | 0.883425 | 1.902606 |

|         |          |          |          |          |
|---------|----------|----------|----------|----------|
| PRPSAP2 | 0.785988 | 1.049341 | 0.741194 | 1.485599 |
| RNF2    | 0.361722 | 1.204419 | 0.8076   | 1.796217 |
| STAMPB  | 0.20551  | 1.328096 | 0.855958 | 2.060662 |
| PRKRA   | 0.200097 | 1.345501 | 0.854536 | 2.118544 |
| DCLRE1B | 0.367705 | 1.17439  | 0.827773 | 1.666147 |
| DAXX    | 0.615495 | 1.128574 | 0.703942 | 1.809352 |
| SSR3    | 0.04494  | 1.400912 | 1.007637 | 1.947679 |
| CTDNEP1 | 0.02821  | 1.975691 | 1.075442 | 3.629536 |
| SEH1L   | 0.540256 | 1.122175 | 0.77598  | 1.62282  |
| RP9     | 0.715207 | 1.078585 | 0.718411 | 1.619331 |
| ABCB7   | 0.824481 | 1.04424  | 0.712291 | 1.530888 |
| HSP90B1 | 0.613043 | 1.085849 | 0.789124 | 1.494148 |
| MTFR1   | 0.263845 | 1.138162 | 0.907017 | 1.428213 |
| UCHL3   | 0.150677 | 1.283596 | 0.913176 | 1.804272 |
| PDIA6   | 0.394222 | 1.129292 | 0.853743 | 1.493776 |
| PTGES3  | 0.001873 | 1.912046 | 1.270792 | 2.876882 |
| ANKS1A  | 0.877016 | 1.021959 | 0.776176 | 1.34557  |
| FKBP1   | 0.279898 | 1.226742 | 0.846774 | 1.77721  |
| LRP12   | 0.029517 | 1.294657 | 1.026026 | 1.63362  |
| REPIN1  | 0.968727 | 1.00665  | 0.722732 | 1.402101 |
| NOL10   | 0.140317 | 1.328145 | 0.910826 | 1.93667  |
| AVEN    | 0.000123 | 2.067843 | 1.42714  | 2.996183 |
| PGBD1   | 0.182144 | 0.832287 | 0.635553 | 1.089921 |
| ABHD3   | 0.316799 | 1.148845 | 0.87554  | 1.507465 |
| RSRC1   | 0.00276  | 1.607542 | 1.178061 | 2.193597 |
| TUBB2B  | 0.962519 | 0.997451 | 0.896726 | 1.109489 |
| PIGS    | 0.218176 | 1.248964 | 0.876748 | 1.7792   |
| PNP     | 0.033444 | 1.342543 | 1.023364 | 1.76127  |
| MTA3    | 0.63242  | 1.093185 | 0.758828 | 1.574867 |
| PSMG1   | 0.9263   | 1.016037 | 0.725275 | 1.423367 |
| LCLAT1  | 0.171671 | 1.265218 | 0.902959 | 1.77281  |
| UBIAD1  | 0.780307 | 0.934424 | 0.58017  | 1.504986 |
| MARCKS  | 0.40698  | 1.111694 | 0.865553 | 1.42783  |
| SMYD5   | 0.953525 | 0.987251 | 0.641259 | 1.519924 |
| SUV39H1 | 0.027663 | 1.384141 | 1.036382 | 1.848591 |
| HYOU1   | 0.161793 | 1.209278 | 0.926647 | 1.578112 |
| TIMM50  | 0.007998 | 1.60082  | 1.130662 | 2.266482 |
| PAK2    | 0.002048 | 1.706313 | 1.214906 | 2.396485 |
| CHRAC1  | 0.734838 | 1.068675 | 0.727648 | 1.569531 |
| DNMT3B  | 0.323974 | 1.104097 | 0.906872 | 1.344215 |
| MRPL16  | 0.243783 | 1.359251 | 0.811246 | 2.277442 |
| SPATA2  | 0.182502 | 1.295825 | 0.885271 | 1.896777 |
| PARL    | 0.021183 | 1.560486 | 1.068831 | 2.278301 |
| TMPO    | 0.023639 | 1.354674 | 1.04148  | 1.762052 |
| LBR     | 0.070169 | 1.346602 | 0.975788 | 1.858331 |
| RFC2    | 0.052217 | 1.342652 | 0.997178 | 1.807816 |
| BAZ2A   | 0.487966 | 1.107691 | 0.829643 | 1.478925 |
| THAP1   | 0.588677 | 1.107039 | 0.765763 | 1.60041  |
| DHX37   | 0.037422 | 1.430396 | 1.021058 | 2.003834 |
| CRY1    | 0.512411 | 1.120487 | 0.797235 | 1.574807 |
| SKA2    | 0.184435 | 1.224577 | 0.907932 | 1.651654 |
| TTC27   | 0.0911   | 1.397356 | 0.947874 | 2.059984 |
| TUBB    | 0.55993  | 1.085101 | 0.824543 | 1.427995 |
| TAF15   | 0.399748 | 1.133228 | 0.847015 | 1.516155 |

|          |          |          |          |          |
|----------|----------|----------|----------|----------|
| PAAF1    | 0.59974  | 0.897588 | 0.59955  | 1.343781 |
| RARS     | 0.009498 | 1.643385 | 1.129031 | 2.392063 |
| FKBP1A   | 0.569493 | 1.156928 | 0.700109 | 1.911819 |
| SMPD4    | 0.054153 | 1.453575 | 0.99335  | 2.127025 |
| MND1     | 0.016824 | 1.255813 | 1.04188  | 1.513672 |
| RCCD1    | 0.004277 | 1.558257 | 1.149431 | 2.112493 |
| PGP      | 0.109419 | 1.34102  | 0.936287 | 1.92071  |
| TAF1A    | 0.051894 | 1.409189 | 0.997189 | 1.991413 |
| HSF2BP   | 0.007703 | 1.492971 | 1.111825 | 2.004777 |
| USP1     | 0.118511 | 1.27528  | 0.939753 | 1.730604 |
| TICRR    | 0.006985 | 1.362603 | 1.088278 | 1.706078 |
| AP3M2    | 0.290756 | 1.188465 | 0.862722 | 1.637199 |
| ZNF384   | 0.181026 | 1.251737 | 0.900801 | 1.739391 |
| MRPL3    | 0.046765 | 1.474011 | 1.005568 | 2.160677 |
| C6orf120 | 0.478956 | 1.118825 | 0.819918 | 1.526701 |
| FBXL14   | 0.071839 | 1.300719 | 0.976927 | 1.73183  |
| CBX2     | 0.401102 | 1.072101 | 0.911293 | 1.261284 |
| YDJC     | 0.576491 | 1.094341 | 0.797548 | 1.50158  |
| MESD     | 0.000384 | 2.001916 | 1.364765 | 2.936527 |
| MRPL47   | 0.020405 | 1.440743 | 1.058137 | 1.961692 |
| HYLS1    | 0.090719 | 1.296178 | 0.959682 | 1.750661 |
| BCL2L12  | 0.091345 | 1.322829 | 0.955988 | 1.830438 |
| CDKN2D   | 0.370042 | 1.134511 | 0.860934 | 1.495021 |
| OIP5     | 0.001148 | 1.375941 | 1.135149 | 1.667811 |
| GRPEL1   | 0.006629 | 1.764526 | 1.17107  | 2.658723 |
| ORC6     | 0.026928 | 1.268252 | 1.027502 | 1.565411 |
| ISOC1    | 0.424661 | 1.135895 | 0.830776 | 1.553076 |
| RIOK1    | 0.782109 | 1.050678 | 0.740155 | 1.491476 |
| PPID     | 0.009963 | 1.715471 | 1.137962 | 2.586061 |
| MAP7D3   | 0.659719 | 0.940583 | 0.716105 | 1.235428 |
| TFCP2    | 0.130215 | 1.371629 | 0.910936 | 2.065311 |
| ZBTB39   | 0.9158   | 1.017323 | 0.739917 | 1.398734 |
| PSAT1    | 0.45679  | 1.057936 | 0.912088 | 1.227105 |
| MTCH2    | 0.091524 | 1.400834 | 0.947012 | 2.072133 |
| SINHCAF  | 0.41817  | 1.111007 | 0.861075 | 1.433482 |
| IPO9     | 0.129749 | 1.287285 | 0.928531 | 1.78465  |
| C1orf174 | 0.76838  | 0.939791 | 0.621646 | 1.420753 |
| FANCL    | 0.013376 | 1.571856 | 1.09846  | 2.249267 |
| GART     | 0.139402 | 1.307509 | 0.916285 | 1.865771 |
| RGP1     | 0.307197 | 1.171186 | 0.864777 | 1.586163 |
| CEP78    | 0.294523 | 1.218357 | 0.842167 | 1.762588 |
| CBX3     | 0.243412 | 1.222948 | 0.872056 | 1.715029 |
| TWISTNB  | 0.128996 | 1.265158 | 0.933828 | 1.714047 |
| KHNYN    | 0.784777 | 1.05101  | 0.735429 | 1.50201  |
| NRBF2    | 0.445107 | 1.194283 | 0.757168 | 1.883746 |
| PLLP     | 0.458812 | 1.080319 | 0.880608 | 1.325322 |
| LIN9     | 0.022678 | 1.451131 | 1.053478 | 1.998884 |
| SLC38A1  | 0.017628 | 1.261998 | 1.041363 | 1.529378 |
| GLOD4    | 0.056148 | 1.52247  | 0.989039 | 2.343601 |
| ATP2B1   | 0.055343 | 1.235393 | 0.995181 | 1.533588 |
| ESRP1    | 0.669151 | 1.064002 | 0.800509 | 1.414225 |
| ATP6V1E2 | 0.730832 | 0.94395  | 0.67956  | 1.311204 |
| CTNBL1   | 0.12873  | 1.367926 | 0.913096 | 2.049315 |
| GPN3     | 0.189642 | 1.262735 | 0.891092 | 1.789377 |

|          |          |          |          |          |
|----------|----------|----------|----------|----------|
| KLHDC3   | 0.668687 | 0.913465 | 0.603483 | 1.382671 |
| FADS2    | 0.086153 | 1.151    | 0.98021  | 1.351548 |
| PRKAG1   | 0.441987 | 1.183999 | 0.76977  | 1.821133 |
| FKBP3    | 0.097078 | 1.312736 | 0.951868 | 1.810413 |
| RIOX2    | 0.355422 | 1.204835 | 0.811501 | 1.788818 |
| SNRPF    | 0.128741 | 1.319788 | 0.922628 | 1.887912 |
| LDHB     | 0.050619 | 1.214547 | 0.999476 | 1.475897 |
| CENPM    | 0.007766 | 1.298377 | 1.071295 | 1.573594 |
| WDR4     | 0.012907 | 1.498039 | 1.089327 | 2.060099 |
| SPAG5    | 0.00472  | 1.297347 | 1.083011 | 1.554101 |
| TOMM70   | 0.119893 | 1.359653 | 0.923157 | 2.002536 |
| KIF22    | 0.301383 | 1.175258 | 0.86522  | 1.596392 |
| RTN4IP1  | 0.464151 | 1.140647 | 0.801922 | 1.622447 |
| GSK3A    | 0.002264 | 1.877545 | 1.253044 | 2.81329  |
| MEX3A    | 0.105671 | 0.88435  | 0.762019 | 1.02632  |
| DDX1     | 0.312607 | 1.218122 | 0.830547 | 1.786558 |
| BCL2L13  | 0.255039 | 1.253938 | 0.849269 | 1.851427 |
| TMEM39A  | 0.46681  | 1.162696 | 0.774705 | 1.745002 |
| RBBP7    | 0.009615 | 1.621392 | 1.124656 | 2.337525 |
| ERCC6L   | 0.062665 | 1.243928 | 0.988528 | 1.565314 |
| TFAM     | 0.049106 | 1.404984 | 1.001333 | 1.971354 |
| LSM5     | 0.101089 | 1.340928 | 0.944291 | 1.904167 |
| ENOPH1   | 0.223811 | 1.268127 | 0.864861 | 1.859427 |
| TCP1     | 0.000323 | 1.856612 | 1.325189 | 2.601146 |
| FBX05    | 0.018364 | 1.37916  | 1.055788 | 1.801575 |
| SEN3     | 0.05148  | 1.616809 | 0.996919 | 2.62215  |
| DNAJC6   | 0.499022 | 1.075008 | 0.871649 | 1.325812 |
| ELOVL7   | 0.081416 | 1.194406 | 0.978076 | 1.458582 |
| ELK1     | 0.172054 | 1.310614 | 0.888944 | 1.932303 |
| WDR1     | 0.003554 | 1.891474 | 1.232262 | 2.90334  |
| ZFP69B   | 0.553755 | 0.904463 | 0.648705 | 1.261057 |
| ETFA     | 0.006799 | 1.631903 | 1.144644 | 2.326581 |
| GINS4    | 0.043559 | 1.227747 | 1.005949 | 1.498448 |
| ARMC1    | 0.812891 | 1.036047 | 0.772736 | 1.389081 |
| CPSF2    | 0.038478 | 1.491963 | 1.021444 | 2.179221 |
| PCNA     | 0.169447 | 1.185228 | 0.930089 | 1.510356 |
| BZW1     | 0.001197 | 1.805618 | 1.262881 | 2.581604 |
| APOBEC3B | 0.543677 | 0.957519 | 0.83234  | 1.101525 |
| CCDC138  | 0.349959 | 1.185175 | 0.829972 | 1.692395 |
| MAST2    | 0.472064 | 1.113971 | 0.83008  | 1.494955 |
| GTF2IRD1 | 0.50488  | 1.112919 | 0.812638 | 1.524158 |
| HNRNPU   | 0.084865 | 1.438082 | 0.951292 | 2.17397  |
| MCM4     | 0.03137  | 1.231761 | 1.018806 | 1.489227 |
| PRIM2    | 0.232339 | 1.226725 | 0.877225 | 1.715469 |
| STARD7   | 0.920087 | 0.977664 | 0.628827 | 1.520016 |
| MLLT11   | 0.637359 | 1.0445   | 0.871548 | 1.251773 |
| CEP89    | 0.112113 | 1.361165 | 0.930493 | 1.99117  |
| NOP56    | 0.538605 | 1.108652 | 0.798029 | 1.54018  |
| CASTOR2  | 0.426636 | 1.111088 | 0.856952 | 1.440589 |
| ZNF830   | 0.967124 | 1.010034 | 0.628279 | 1.62375  |
| KIF15    | 0.070511 | 1.208164 | 0.9843   | 1.482943 |
| CEP85    | 0.830161 | 0.966893 | 0.710842 | 1.315176 |
| CDCP1    | 0.003076 | 1.299131 | 1.092443 | 1.544925 |
| ZNF544   | 0.015111 | 1.604599 | 1.095731 | 2.349792 |

|          |          |          |          |          |
|----------|----------|----------|----------|----------|
| L2HGDH   | 0.540583 | 1.113384 | 0.789305 | 1.570527 |
| TMEM201  | 0.707603 | 1.064294 | 0.768512 | 1.473917 |
| HSPA14   | 0.703216 | 1.072192 | 0.749092 | 1.534652 |
| SLC7A5   | 0.003978 | 1.281795 | 1.082531 | 1.517738 |
| C9orf40  | 0.078501 | 1.265987 | 0.973479 | 1.646385 |
| C15orf41 | 0.005962 | 1.712989 | 1.167201 | 2.513988 |
| RRP1B    | 0.091773 | 1.361574 | 0.951108 | 1.949181 |
| YARS     | 0.230108 | 1.281962 | 0.854465 | 1.923339 |
| SV2A     | 0.384764 | 0.926186 | 0.779116 | 1.101018 |
| PRC1     | 0.000568 | 1.390749 | 1.152891 | 1.677681 |
| FASTKD1  | 0.855513 | 1.040114 | 0.681119 | 1.588324 |
| SLC29A2  | 0.957141 | 0.994071 | 0.800272 | 1.234803 |
| BCAS2    | 0.780626 | 1.054152 | 0.727313 | 1.527865 |
| POLR2D   | 0.575843 | 1.127663 | 0.740254 | 1.717822 |
| CEBPG    | 0.010641 | 1.510434 | 1.100708 | 2.072674 |
| CNBP     | 0.304944 | 1.257043 | 0.811973 | 1.946071 |
| DUS4L    | 0.244314 | 1.254318 | 0.856536 | 1.836833 |
| THAP12   | 0.710291 | 0.932293 | 0.644022 | 1.349597 |
| METTL2B  | 0.907206 | 1.029376 | 0.632626 | 1.674947 |
| FBXO10   | 0.852846 | 1.04176  | 0.676124 | 1.605123 |
| NAE1     | 0.216002 | 1.302214 | 0.857053 | 1.978594 |
| NDE1     | 0.162325 | 1.208826 | 0.926474 | 1.577227 |
| HMGA1    | 0.000244 | 1.391977 | 1.166506 | 1.661028 |
| AP2M1    | 0.000423 | 1.927864 | 1.338363 | 2.77702  |
| CDKN2A   | 0.462729 | 1.041616 | 0.934215 | 1.161366 |
| MRGBP    | 0.263147 | 1.221698 | 0.860284 | 1.734947 |
| SPATA5L1 | 0.01786  | 1.567898 | 1.080663 | 2.27481  |
| IDH3B    | 0.256281 | 1.255596 | 0.84759  | 1.860003 |
| RPAP3    | 0.389379 | 1.190213 | 0.800613 | 1.769403 |
| GTF2H3   | 0.225807 | 1.253783 | 0.869527 | 1.807847 |
| SAE1     | 0.002512 | 1.769524 | 1.222076 | 2.562211 |
| PTMS     | 0.765016 | 0.95922  | 0.730048 | 1.260333 |
| ZUP1     | 0.102087 | 1.448763 | 0.928923 | 2.259513 |
| SGO1     | 0.004141 | 1.36294  | 1.10294  | 1.68423  |
| NUDT15   | 0.000971 | 1.796306 | 1.268376 | 2.543973 |
| AIMP1    | 0.465179 | 1.185353 | 0.75105  | 1.870796 |
| FCF1     | 0.111545 | 1.43115  | 0.920301 | 2.225566 |
| RTRAF    | 0.179246 | 1.413317 | 0.853089 | 2.341448 |
| GTF3C6   | 0.013516 | 1.672433 | 1.112014 | 2.515284 |
| SLC49A4  | 0.899398 | 1.022496 | 0.724221 | 1.443619 |
| BAG4     | 0.139565 | 1.236462 | 0.933023 | 1.638587 |
| COX5A    | 0.023132 | 1.477806 | 1.054986 | 2.070084 |
| PRPF40A  | 0.084962 | 1.412372 | 0.953536 | 2.091995 |
| BAG6     | 0.348672 | 1.1761   | 0.83776  | 1.651082 |
| UTP6     | 0.395934 | 1.210141 | 0.779082 | 1.879701 |
| BIRC5    | 0.013011 | 1.217023 | 1.042271 | 1.421076 |
| PSIP1    | 0.672105 | 1.062824 | 0.801546 | 1.40927  |
| MYBBP1A  | 0.324139 | 1.16604  | 0.85921  | 1.582442 |
| GTPBP8   | 0.097474 | 1.41953  | 0.938008 | 2.148239 |
| SLC36A4  | 0.218892 | 1.217652 | 0.889584 | 1.666707 |
| RBM19    | 0.256252 | 1.248498 | 0.851108 | 1.831432 |
| ATG13    | 0.11507  | 1.462523 | 0.911488 | 2.346684 |
| RALBP1   | 0.302635 | 1.180252 | 0.861235 | 1.61744  |
| WRAP53   | 0.070467 | 1.4547   | 0.969184 | 2.183437 |

|          |          |          |          |          |
|----------|----------|----------|----------|----------|
| PRRC2A   | 0.573704 | 1.08329  | 0.819792 | 1.431482 |
| PSMA2    | 0.062717 | 1.456103 | 0.980256 | 2.162941 |
| SFXN5    | 0.339875 | 1.208559 | 0.819076 | 1.783249 |
| GOT2     | 0.00911  | 1.63735  | 1.130326 | 2.371806 |
| ACAT2    | 0.00068  | 1.581241 | 1.213935 | 2.059685 |
| EPOP     | 0.476072 | 1.085789 | 0.865834 | 1.36162  |
| MDC1     | 0.639852 | 1.068485 | 0.809587 | 1.410175 |
| DDX18    | 0.570486 | 1.10651  | 0.780017 | 1.569665 |
| FAM168B  | 0.218085 | 1.216473 | 0.890584 | 1.661612 |
| HMGN4    | 0.895647 | 0.980594 | 0.731662 | 1.314219 |
| MMD      | 0.620686 | 1.045876 | 0.875646 | 1.2492   |
| C17orf58 | 0.096923 | 1.283949 | 0.955833 | 1.724701 |
| RPTOR    | 0.097691 | 1.342301 | 0.947429 | 1.90175  |
| FOXK2    | 0.334495 | 1.201457 | 0.827624 | 1.744148 |
| SNRPC    | 0.255837 | 1.262588 | 0.844494 | 1.887672 |
| IPO5     | 0.069905 | 1.35472  | 0.975607 | 1.881153 |
| DPM1     | 0.167117 | 1.286974 | 0.899754 | 1.84084  |
| CDC123   | 0.228228 | 1.277424 | 0.857766 | 1.902398 |
| ZPR1     | 0.021933 | 1.540965 | 1.064564 | 2.230558 |
| UNK      | 0.582928 | 1.1089   | 0.766755 | 1.60372  |
| MCM3     | 0.086038 | 1.264432 | 0.967296 | 1.652843 |
| HK2      | 0.06933  | 1.17071  | 0.987608 | 1.387758 |
| RMI1     | 0.235927 | 1.215686 | 0.880148 | 1.679143 |
| STK38L   | 0.194803 | 1.207313 | 0.908092 | 1.605128 |
| RNF34    | 0.356829 | 1.248502 | 0.778681 | 2.00179  |
| FADS1    | 0.110056 | 1.190075 | 0.961342 | 1.473231 |
| NDUFAF4  | 0.096578 | 1.329426 | 0.950169 | 1.860061 |
| RTF2     | 0.415303 | 1.219442 | 0.756576 | 1.965487 |
| ALOX12   | 0.891922 | 1.019551 | 0.7711   | 1.348053 |
| BLOC1S5  | 0.896105 | 1.027327 | 0.685437 | 1.53975  |
| ZNF71    | 0.389083 | 0.845145 | 0.576307 | 1.239393 |
| EIF2A    | 0.030253 | 1.592189 | 1.04539  | 2.424996 |
| LRRC1    | 0.025292 | 1.380057 | 1.040687 | 1.830097 |
| NFYA     | 0.350858 | 1.152843 | 0.855064 | 1.554322 |
| C1orf112 | 0.078455 | 1.32115  | 0.968805 | 1.801638 |
| PSME3    | 0.035708 | 1.438495 | 1.024582 | 2.019622 |
| RTCB     | 0.514479 | 1.139774 | 0.769105 | 1.689084 |
| COQ3     | 0.178744 | 1.240238 | 0.906171 | 1.697461 |
| SAPCD2   | 0.018644 | 1.241395 | 1.036746 | 1.48644  |
| GINS1    | 0.230382 | 1.120679 | 0.930297 | 1.350021 |
| CDK2AP1  | 0.099346 | 1.357355 | 0.94381  | 1.9521   |
| CHD4     | 0.53249  | 1.106495 | 0.805289 | 1.520364 |
| ATXN7L3  | 0.827197 | 1.043168 | 0.713777 | 1.524564 |
| ATAD3A   | 0.337419 | 1.15276  | 0.862176 | 1.541283 |
| RBBP4    | 0.771091 | 0.943696 | 0.638687 | 1.394364 |
| MCM5     | 0.009015 | 1.428557 | 1.09306  | 1.867031 |
| MMACHC   | 0.275523 | 0.792617 | 0.521961 | 1.203619 |
| ZNF143   | 0.372423 | 1.244454 | 0.769611 | 2.012271 |
| CHAC2    | 0.159137 | 1.1968   | 0.931993 | 1.536847 |
| WASF1    | 0.129295 | 1.186865 | 0.951191 | 1.480931 |
| ORC1     | 0.011233 | 1.294761 | 1.060379 | 1.58095  |
| RAE1     | 0.182337 | 1.268001 | 0.894471 | 1.797516 |
| PIGW     | 0.45138  | 1.142684 | 0.807561 | 1.616877 |
| PREP     | 0.699333 | 1.078467 | 0.735058 | 1.582312 |

|          |          |          |          |          |
|----------|----------|----------|----------|----------|
| SLC35F2  | 0.204394 | 1.158385 | 0.923087 | 1.453661 |
| SPIN4    | 0.040471 | 1.300363 | 1.011467 | 1.671774 |
| FAF1     | 0.825919 | 1.04867  | 0.686624 | 1.601617 |
| GRB10    | 0.048416 | 1.239764 | 1.001497 | 1.534718 |
| CDCA3    | 0.005265 | 1.33656  | 1.090168 | 1.63864  |
| UBE2S    | 0.000465 | 1.448802 | 1.1772   | 1.783067 |
| MRT04    | 0.460459 | 1.161618 | 0.780353 | 1.729164 |
| SYCE2    | 0.619836 | 1.084879 | 0.786309 | 1.49682  |
| SLC25A19 | 0.691756 | 0.930527 | 0.651839 | 1.328366 |
| PGAM1    | 0.000694 | 1.744238 | 1.264715 | 2.405575 |
| STK26    | 0.298769 | 1.130383 | 0.897074 | 1.424371 |
| EHMT2    | 0.970618 | 0.994529 | 0.742746 | 1.331664 |
| MFSD14B  | 0.060331 | 1.48929  | 0.982847 | 2.256695 |
| UBE2E2   | 0.618524 | 1.071769 | 0.815867 | 1.407935 |
| SYT1     | 0.670817 | 1.033814 | 0.886835 | 1.205153 |
| CGAS     | 0.2208   | 1.168492 | 0.910697 | 1.499262 |
| MTHFD1L  | 0.026412 | 1.42351  | 1.042245 | 1.944246 |
| SASS6    | 0.168773 | 1.225878 | 0.91723  | 1.638388 |
| CCNJ     | 0.975183 | 1.004912 | 0.73797  | 1.368415 |
| CCNK     | 0.374547 | 1.189076 | 0.811348 | 1.742659 |
| FAM49B   | 0.371468 | 1.147918 | 0.848252 | 1.553449 |
| VPS26A   | 0.125306 | 1.335355 | 0.922585 | 1.932801 |
| PSMD7    | 0.000851 | 1.887642 | 1.299573 | 2.741817 |
| HTATSF1  | 0.912057 | 0.981677 | 0.707034 | 1.363002 |
| RFWD3    | 0.012755 | 1.52485  | 1.094043 | 2.125298 |
| IARS     | 0.088575 | 1.323671 | 0.958565 | 1.827843 |
| TXNL4A   | 0.0821   | 1.419155 | 0.956414 | 2.105783 |
| GMNN     | 0.15828  | 1.197267 | 0.93233  | 1.537489 |
| E2F1     | 0.255931 | 1.106868 | 0.92901  | 1.318778 |
| TMEM106C | 0.360664 | 1.119882 | 0.878496 | 1.427595 |
| DCPS     | 0.004538 | 1.65509  | 1.168707 | 2.343891 |
| MARK1    | 0.916057 | 1.009135 | 0.852149 | 1.19504  |
| PFDN4    | 0.031795 | 1.352169 | 1.026629 | 1.780938 |
| PLAAT1   | 0.869884 | 1.013665 | 0.861723 | 1.192397 |
| AAGAB    | 0.00366  | 1.707363 | 1.190247 | 2.449146 |
| GOLIM4   | 0.683106 | 1.06155  | 0.796885 | 1.414118 |
| LSM14B   | 0.545829 | 0.907226 | 0.661468 | 1.244292 |
| TAF11    | 0.739207 | 1.069495 | 0.720095 | 1.588429 |
| ELOVL5   | 0.4615   | 1.112735 | 0.837365 | 1.478661 |
| TRMT10A  | 0.013231 | 1.618085 | 1.105755 | 2.367792 |
| MTHFD1   | 0.024686 | 1.447716 | 1.048288 | 1.999338 |
| CCDC137  | 0.027672 | 1.454531 | 1.042029 | 2.030328 |
| ABHD14A  | 0.008932 | 0.688099 | 0.519939 | 0.910646 |
| EID2     | 0.730174 | 1.06991  | 0.728741 | 1.5708   |
| UNG      | 0.048934 | 1.351118 | 1.001407 | 1.822955 |
| TIMM22   | 0.045343 | 1.676621 | 1.010772 | 2.781101 |
| E2F3     | 0.951291 | 1.009256 | 0.750959 | 1.356396 |
| DZIP1    | 0.649582 | 1.066492 | 0.807893 | 1.407865 |
| HSPA8    | 0.03993  | 1.41141  | 1.015978 | 1.960749 |
| EBNA1BP2 | 0.132267 | 1.342134 | 0.914938 | 1.968792 |
| SUZ12    | 0.223497 | 1.207319 | 0.891413 | 1.635179 |
| ZBTB12   | 0.766068 | 1.034236 | 0.828534 | 1.291009 |
| SFTA2    | 0.117917 | 0.934634 | 0.858698 | 1.017285 |
| EDC3     | 0.115678 | 1.410756 | 0.918873 | 2.165949 |



|           |          |          |          |          |
|-----------|----------|----------|----------|----------|
| BRD2      | 0.753602 | 1.05423  | 0.758099 | 1.466036 |
| NMT1      | 0.449097 | 1.174077 | 0.774863 | 1.778968 |
| HNRNPA1   | 0.222912 | 1.286776 | 0.857853 | 1.930158 |
| CSTF3     | 0.169052 | 1.364338 | 0.876267 | 2.124258 |
| GOLGA7    | 0.493772 | 1.113232 | 0.818766 | 1.513599 |
| AUNIP     | 0.011012 | 1.33039  | 1.067578 | 1.657899 |
| WBP11     | 0.073158 | 1.373603 | 0.970655 | 1.943827 |
| RRP1      | 0.147442 | 1.31766  | 0.907218 | 1.913792 |
| MMP12     | 0.239487 | 1.060755 | 0.961466 | 1.170296 |
| CDK16     | 0.054643 | 1.397195 | 0.993363 | 1.965197 |
| TARDBP    | 0.085245 | 1.591414 | 0.937533 | 2.701344 |
| PFDN6     | 0.634643 | 1.096592 | 0.749687 | 1.60402  |
| DHX8      | 0.647392 | 1.091921 | 0.749096 | 1.591639 |
| DNM1L     | 0.010848 | 1.490158 | 1.096365 | 2.025392 |
| PFKP      | 0.002521 | 1.314298 | 1.100734 | 1.569298 |
| POGLUT1   | 0.368761 | 1.245081 | 0.771977 | 2.008126 |
| AURKB     | 0.03408  | 1.192392 | 1.013303 | 1.403133 |
| DARS      | 0.084033 | 1.396751 | 0.956083 | 2.040527 |
| GRSF1     | 0.345281 | 1.223758 | 0.804594 | 1.861292 |
| NIPA2     | 0.015955 | 1.536715 | 1.083527 | 2.179451 |
| C10orf143 | 0.138925 | 0.744977 | 0.504428 | 1.100237 |
| GPRIN1    | 0.009503 | 1.323621 | 1.070879 | 1.636014 |
| MED24     | 0.828797 | 1.037125 | 0.745322 | 1.443173 |
| CSRP2     | 0.395722 | 1.118263 | 0.864003 | 1.447348 |
| QRSL1     | 0.421766 | 1.158761 | 0.808849 | 1.660046 |
| TMED2     | 0.172756 | 1.248624 | 0.907415 | 1.718137 |
| COIL      | 0.994852 | 0.998729 | 0.678726 | 1.469606 |
| PARPBP    | 0.024474 | 1.308039 | 1.035178 | 1.652825 |
| KPNB1     | 0.09696  | 1.337    | 0.948828 | 1.883976 |
| ARL6IP6   | 0.159273 | 1.228013 | 0.922547 | 1.634622 |
| PCYT1A    | 0.004504 | 1.711596 | 1.18128  | 2.479988 |
| TEDC2     | 0.038148 | 1.274765 | 1.013355 | 1.603609 |
| PTGES2    | 0.402823 | 1.164636 | 0.814928 | 1.664414 |
| NCBP2AS2  | 0.14755  | 1.270342 | 0.918926 | 1.756145 |
| FAM161A   | 0.995811 | 1.000797 | 0.743212 | 1.347659 |
| RNFT2     | 0.195318 | 1.153014 | 0.9295   | 1.430276 |
| DENR      | 0.007839 | 1.667602 | 1.143883 | 2.431104 |
| ASAP1     | 0.041455 | 1.336979 | 1.011314 | 1.767516 |
| B4GALNT4  | 0.439416 | 0.952472 | 0.841866 | 1.077608 |
| CALU      | 0.017355 | 1.366511 | 1.056553 | 1.767402 |
| UTP11     | 0.456093 | 1.192914 | 0.750143 | 1.897031 |
| ADAM17    | 0.486477 | 1.098662 | 0.842901 | 1.432028 |
| WRNIP1    | 0.891698 | 0.973403 | 0.66034  | 1.434888 |
| CISD1     | 0.067287 | 1.404124 | 0.976136 | 2.019763 |
| ALG9      | 0.285504 | 0.837099 | 0.604038 | 1.160085 |
| BUB3      | 0.011816 | 1.609967 | 1.111243 | 2.332516 |
| SF3B3     | 0.248446 | 1.240495 | 0.860302 | 1.788707 |
| FBX041    | 0.443383 | 0.90769  | 0.708567 | 1.16277  |
| DHX16     | 0.939345 | 0.986746 | 0.699767 | 1.391418 |
| IPO4      | 0.414202 | 1.164783 | 0.807666 | 1.679803 |
| MICB      | 0.418692 | 1.085511 | 0.889755 | 1.324334 |
| ROB01     | 0.923018 | 0.989482 | 0.79849  | 1.226158 |
| TMLHE     | 0.324666 | 1.126921 | 0.888436 | 1.429425 |
| CKS1B     | 0.001871 | 1.399732 | 1.132416 | 1.730149 |

|          |          |          |          |          |
|----------|----------|----------|----------|----------|
| METTL2A  | 0.712333 | 1.077461 | 0.724719 | 1.601893 |
| CCDC58   | 0.04356  | 1.401253 | 1.0098   | 1.944454 |
| COQ2     | 0.233548 | 1.249898 | 0.865943 | 1.804098 |
| LETM1    | 0.002679 | 1.779104 | 1.221422 | 2.591416 |
| KIF24    | 0.14096  | 1.213024 | 0.938025 | 1.568643 |
| GDI1     | 0.479731 | 1.146832 | 0.784316 | 1.676905 |
| PARP1    | 0.096349 | 1.342902 | 0.948677 | 1.900947 |
| OGFOD2   | 0.661447 | 1.129197 | 0.655528 | 1.945127 |
| FBX027   | 0.162106 | 1.118665 | 0.955927 | 1.309108 |
| MAGEF1   | 0.234585 | 1.209809 | 0.883737 | 1.656191 |
| ENOX2    | 0.585677 | 1.104165 | 0.773222 | 1.576754 |
| NOC2L    | 0.214956 | 1.22106  | 0.890523 | 1.674283 |
| EXOSC8   | 0.155707 | 1.34733  | 0.892738 | 2.033406 |
| CMC2     | 0.003171 | 1.83985  | 1.227157 | 2.758448 |
| CCNB1    | 0.000607 | 1.400766 | 1.155297 | 1.698391 |
| CWF19L1  | 0.504973 | 1.154614 | 0.756627 | 1.761942 |
| TXNRD1   | 0.005334 | 1.207874 | 1.057602 | 1.379497 |
| CIB2     | 0.034887 | 1.223695 | 1.014428 | 1.476132 |
| STK38    | 0.221905 | 1.233599 | 0.880801 | 1.727708 |
| MAEA     | 0.01606  | 1.667131 | 1.099679 | 2.527397 |
| EXO5     | 0.773863 | 0.948397 | 0.660743 | 1.361283 |
| RHNO1    | 0.067762 | 1.402899 | 0.975582 | 2.017385 |
| UBAC1    | 0.348583 | 1.22261  | 0.803101 | 1.861255 |
| NUP37    | 0.032097 | 1.435667 | 1.031402 | 1.998388 |
| MAP3K13  | 0.937656 | 0.987362 | 0.7179   | 1.357965 |
| NUP153   | 0.194889 | 1.210227 | 0.906923 | 1.614965 |
| CKAP5    | 0.085792 | 1.289365 | 0.964843 | 1.72304  |
| TARS     | 0.266715 | 1.165858 | 0.889277 | 1.528461 |
| ABHD10   | 0.265213 | 1.283893 | 0.827199 | 1.992726 |
| PRMT6    | 0.982838 | 0.997486 | 0.793016 | 1.254675 |
| NUP62    | 0.066245 | 1.472726 | 0.974369 | 2.225976 |
| UBE2V2   | 0.132569 | 1.294601 | 0.924717 | 1.812437 |
| SLC25A33 | 0.520537 | 0.893714 | 0.634356 | 1.259112 |
| SFTPB    | 0.029879 | 0.93403  | 0.878235 | 0.993369 |
| GCH1     | 0.261536 | 1.157422 | 0.896721 | 1.493915 |
| DENND5B  | 0.66466  | 1.060742 | 0.812491 | 1.384843 |
| NCS1     | 0.243889 | 1.149552 | 0.909337 | 1.453223 |
| PPHLN1   | 0.394913 | 1.246802 | 0.75006  | 2.07252  |
| MTPAP    | 0.61612  | 0.900746 | 0.598589 | 1.355426 |
| IRAK1    | 0.228115 | 1.210786 | 0.887119 | 1.652544 |
| TCEA1    | 0.166968 | 1.218527 | 0.92067  | 1.612748 |
| SEC14L1  | 0.308518 | 1.175045 | 0.861435 | 1.602826 |
| SNX4     | 0.847983 | 1.04237  | 0.681954 | 1.593268 |
| LRPPRC   | 0.117683 | 1.306341 | 0.934697 | 1.825753 |
| SUPT7L   | 0.73234  | 1.082659 | 0.686802 | 1.70668  |
| ADIPOR2  | 0.01027  | 1.471501 | 1.095601 | 1.976371 |
| BUB1B    | 0.002592 | 1.321724 | 1.102358 | 1.584743 |
| EIF4A2   | 0.911716 | 1.017761 | 0.745573 | 1.389317 |
| RAB35    | 0.009254 | 1.798305 | 1.155913 | 2.797702 |
| KCTD3    | 0.052535 | 1.288646 | 0.997225 | 1.665228 |
| FBRSL1   | 0.66243  | 0.93737  | 0.701141 | 1.253191 |
| TTPAL    | 0.381847 | 1.158654 | 0.832947 | 1.611722 |
| LRRC61   | 0.22819  | 1.196051 | 0.893905 | 1.600322 |
| WDR75    | 0.099964 | 1.460868 | 0.930006 | 2.294754 |

|         |          |          |          |          |
|---------|----------|----------|----------|----------|
| CENPL   | 0.060378 | 1.313361 | 0.988177 | 1.745555 |
| WASHC5  | 0.276574 | 1.189745 | 0.87003  | 1.626947 |
| ZNF853  | 0.654561 | 0.956734 | 0.788223 | 1.161272 |
| KNSTRN  | 0.003715 | 1.384571 | 1.111356 | 1.724951 |
| STIL    | 0.037369 | 1.269866 | 1.014071 | 1.590185 |
| FHOD3   | 0.17185  | 1.122528 | 0.951017 | 1.324969 |
| PHF13   | 0.441824 | 1.147692 | 0.807924 | 1.630347 |
| RPL39L  | 0.061466 | 1.14669  | 0.993446 | 1.323572 |
| CCDC77  | 0.342545 | 1.17721  | 0.84051  | 1.64879  |
| PDCD5   | 0.016363 | 1.498015 | 1.077018 | 2.083577 |
| RABL3   | 0.29009  | 1.253413 | 0.824821 | 1.90471  |
| WNK2    | 0.440296 | 0.926972 | 0.764577 | 1.123858 |
| SRSF2   | 0.627678 | 1.133129 | 0.683796 | 1.877724 |
| POLE3   | 0.189429 | 1.266712 | 0.889859 | 1.803161 |
| LSM6    | 0.775427 | 1.066298 | 0.686035 | 1.657338 |
| MTFR2   | 0.013609 | 1.291181 | 1.053964 | 1.581788 |
| CDC23   | 0.187578 | 1.336201 | 0.868279 | 2.056289 |
| UBXN2A  | 0.510005 | 1.139829 | 0.772229 | 1.682416 |
| CCT4    | 0.008608 | 1.536483 | 1.115256 | 2.116804 |
| FAM83G  | 0.098073 | 1.250354 | 0.959554 | 1.629282 |
| SMIM13  | 0.417583 | 1.129576 | 0.841345 | 1.51655  |
| SOGA1   | 0.425323 | 1.102498 | 0.867345 | 1.401405 |
| SEPTIN3 | 0.701128 | 0.969927 | 0.829884 | 1.133601 |
| PARP2   | 0.360622 | 1.164176 | 0.840383 | 1.612725 |
| IQCB1   | 0.290999 | 0.838128 | 0.603898 | 1.163208 |
| DDX52   | 0.025747 | 1.523711 | 1.052322 | 2.206261 |
| ZSCAN2  | 0.914947 | 0.979571 | 0.670703 | 1.430677 |
| H2AFV   | 0.589808 | 1.115375 | 0.74993  | 1.658904 |
| ELOVL6  | 0.067556 | 1.166776 | 0.988923 | 1.376615 |
| PPP6R1  | 0.004726 | 1.783805 | 1.19391  | 2.665159 |
