# Supplementary figures and images for: [Retracted] Development of a 5‐Gene Signature to Evaluate Lung Adenocarcinoma Prognosis Based on the Features of Cancer Stem Cells
Source: Hindawi journal article supplement (doi:10.1155/2022/4404406), 2022-01-01

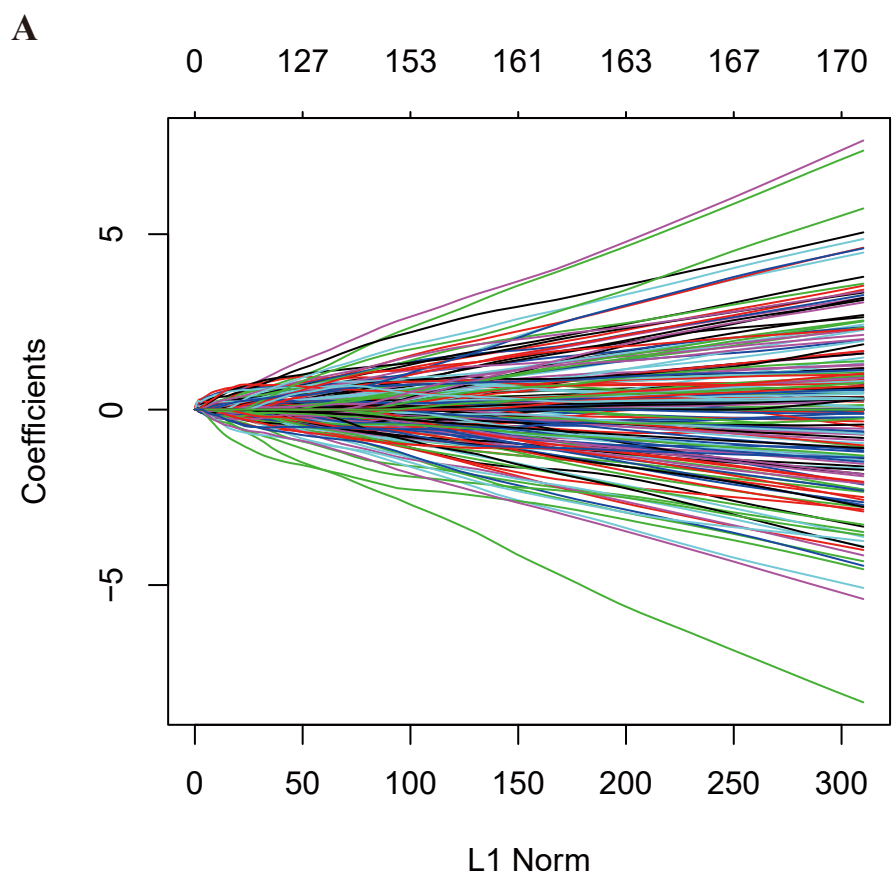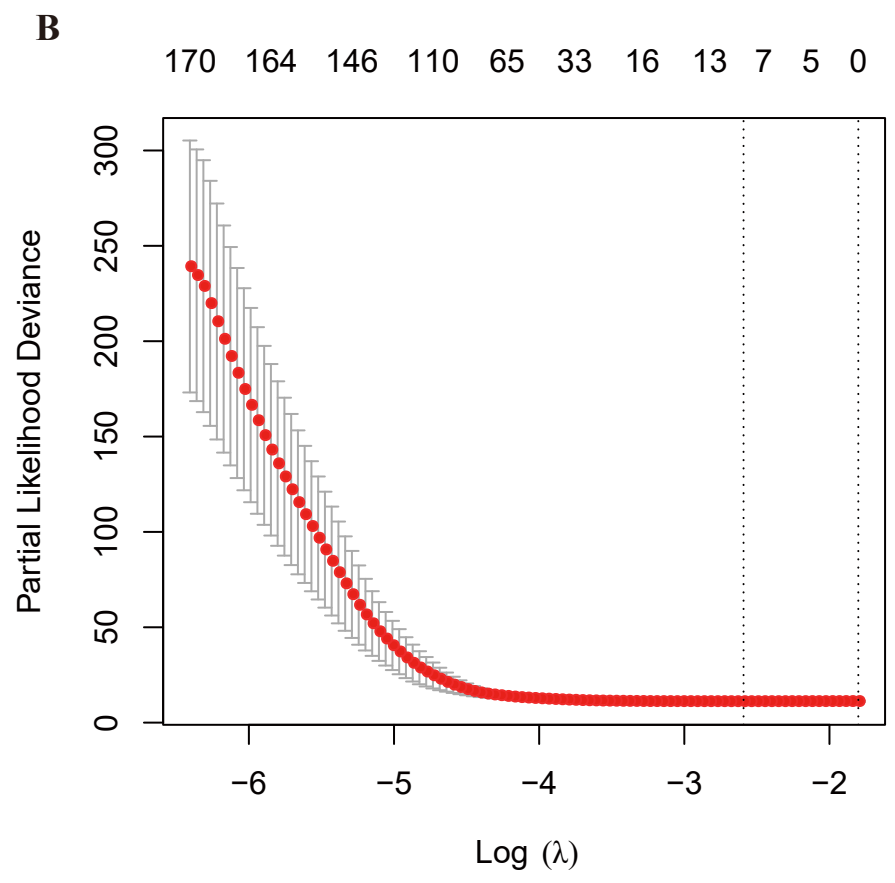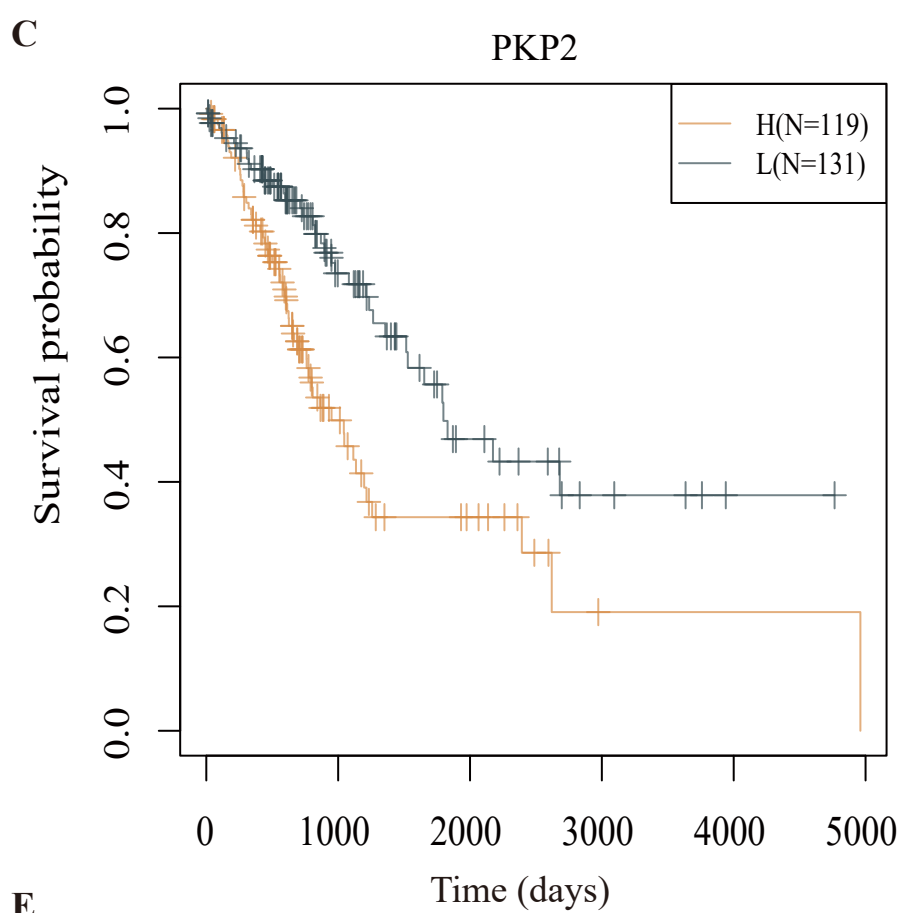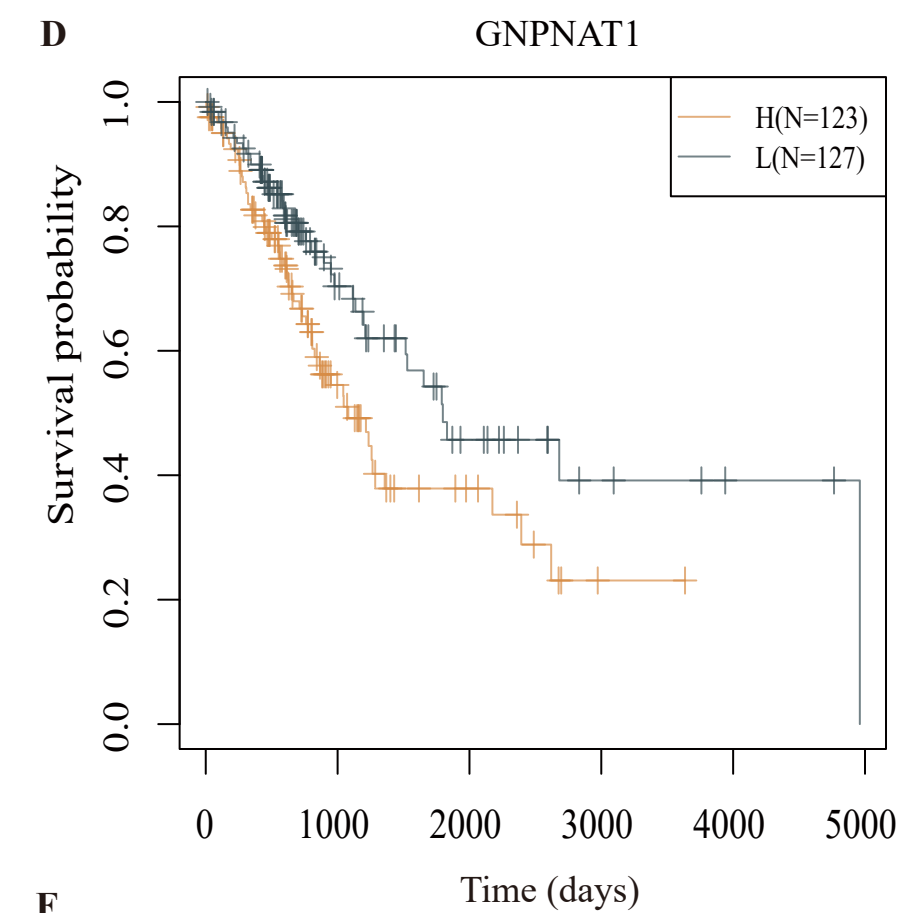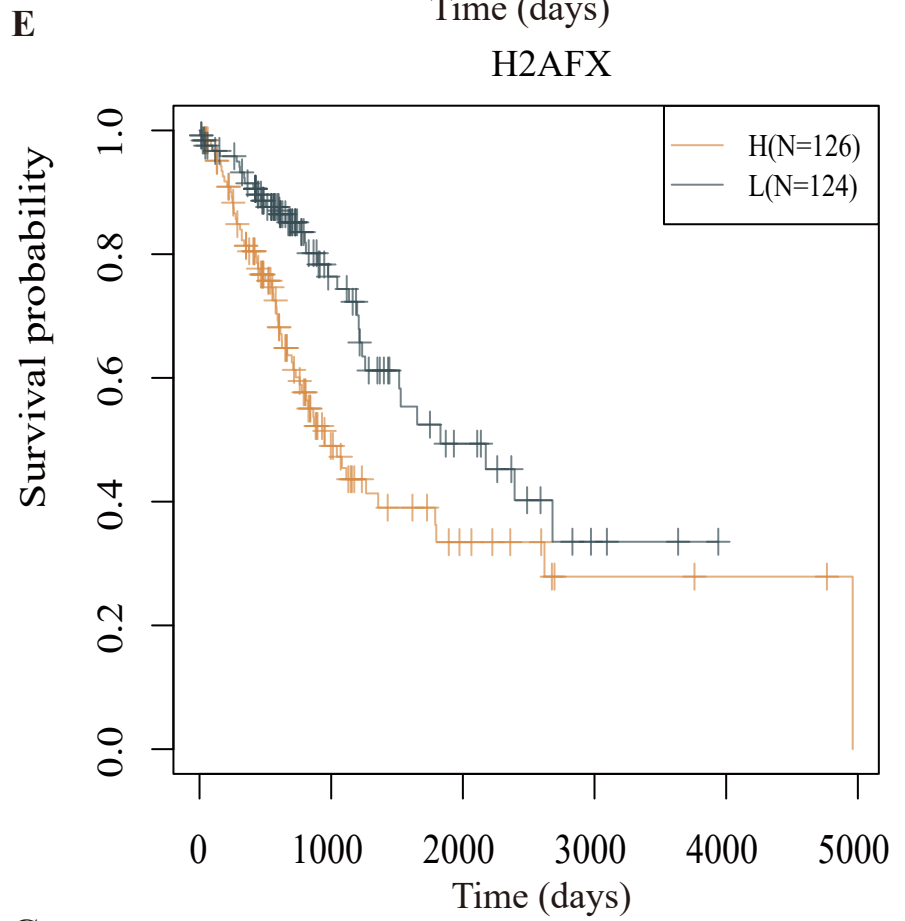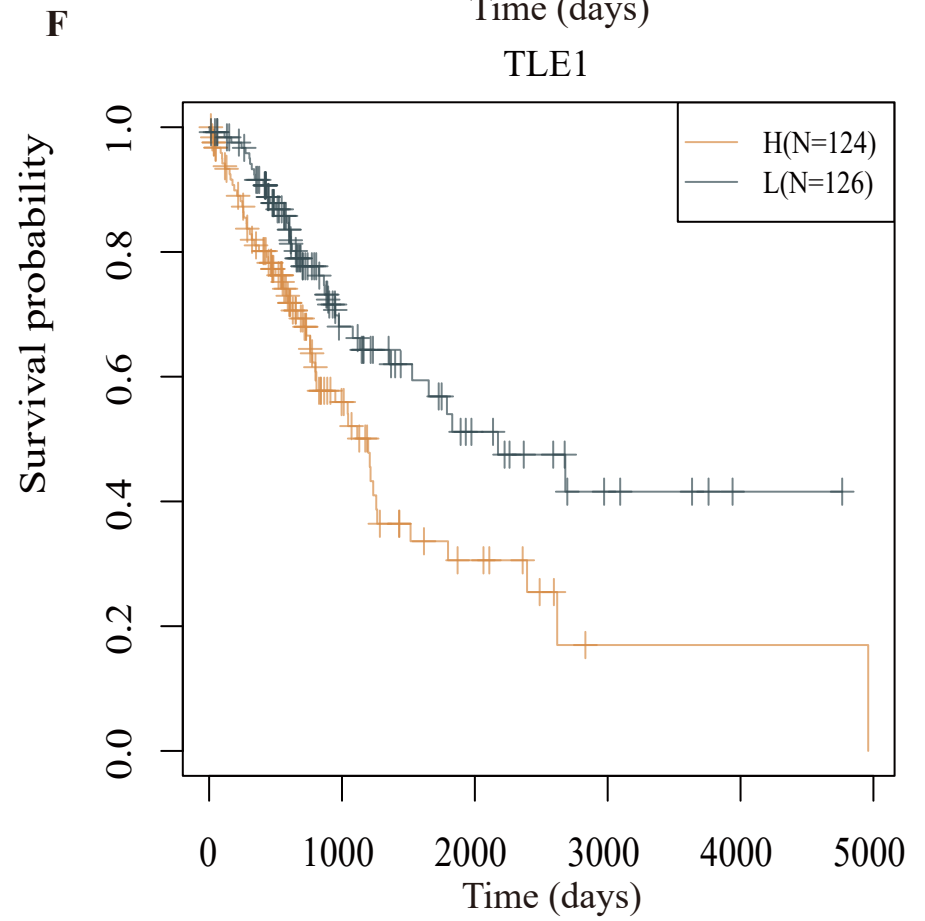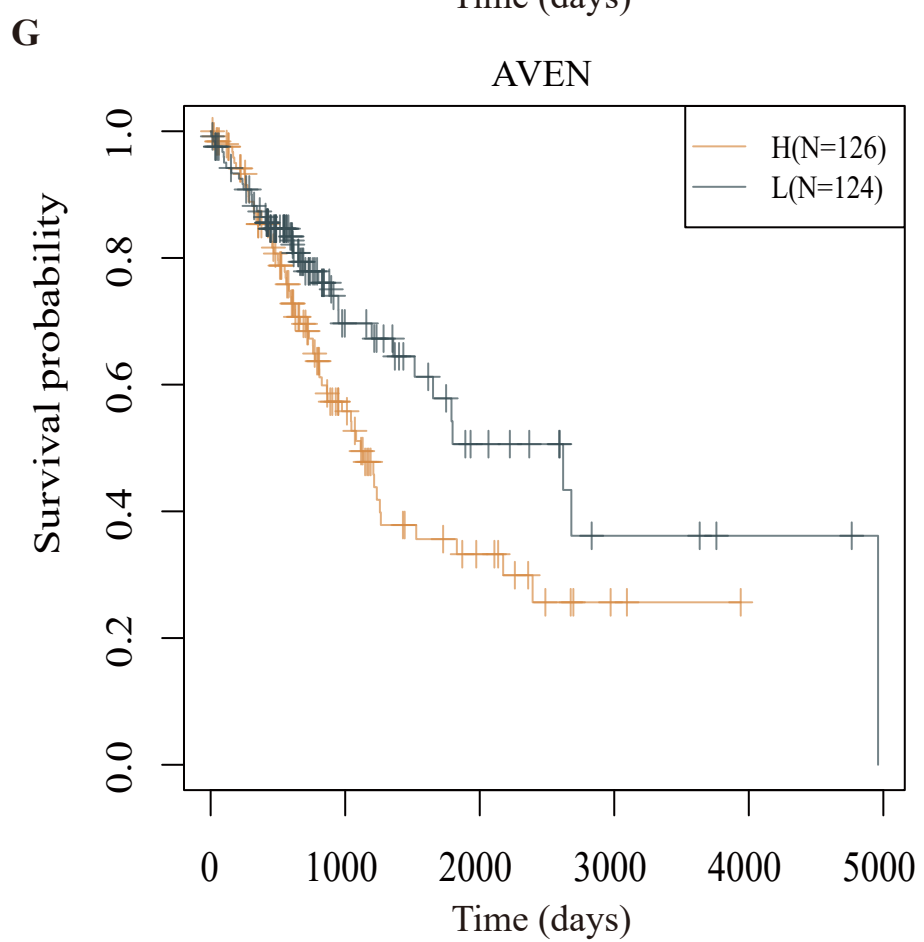

Supplement: f1 [file 4404406.f1.pdf]

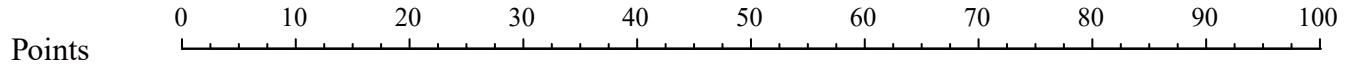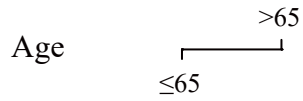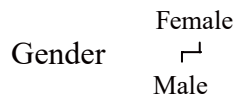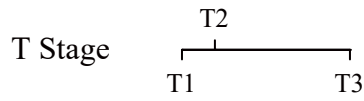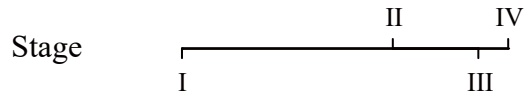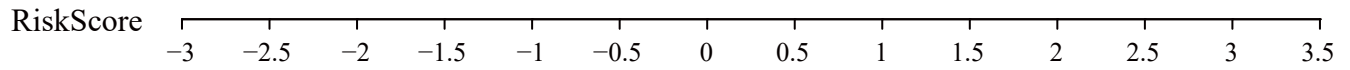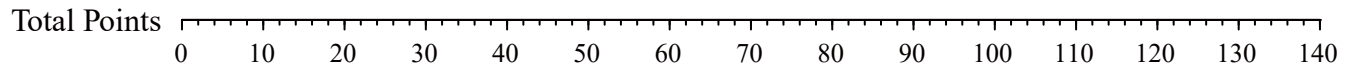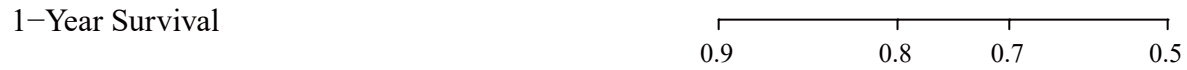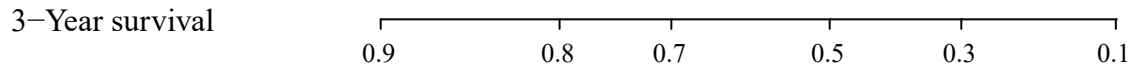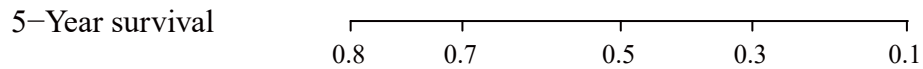

Supplement: f2 [file 4404406.f2.pdf]

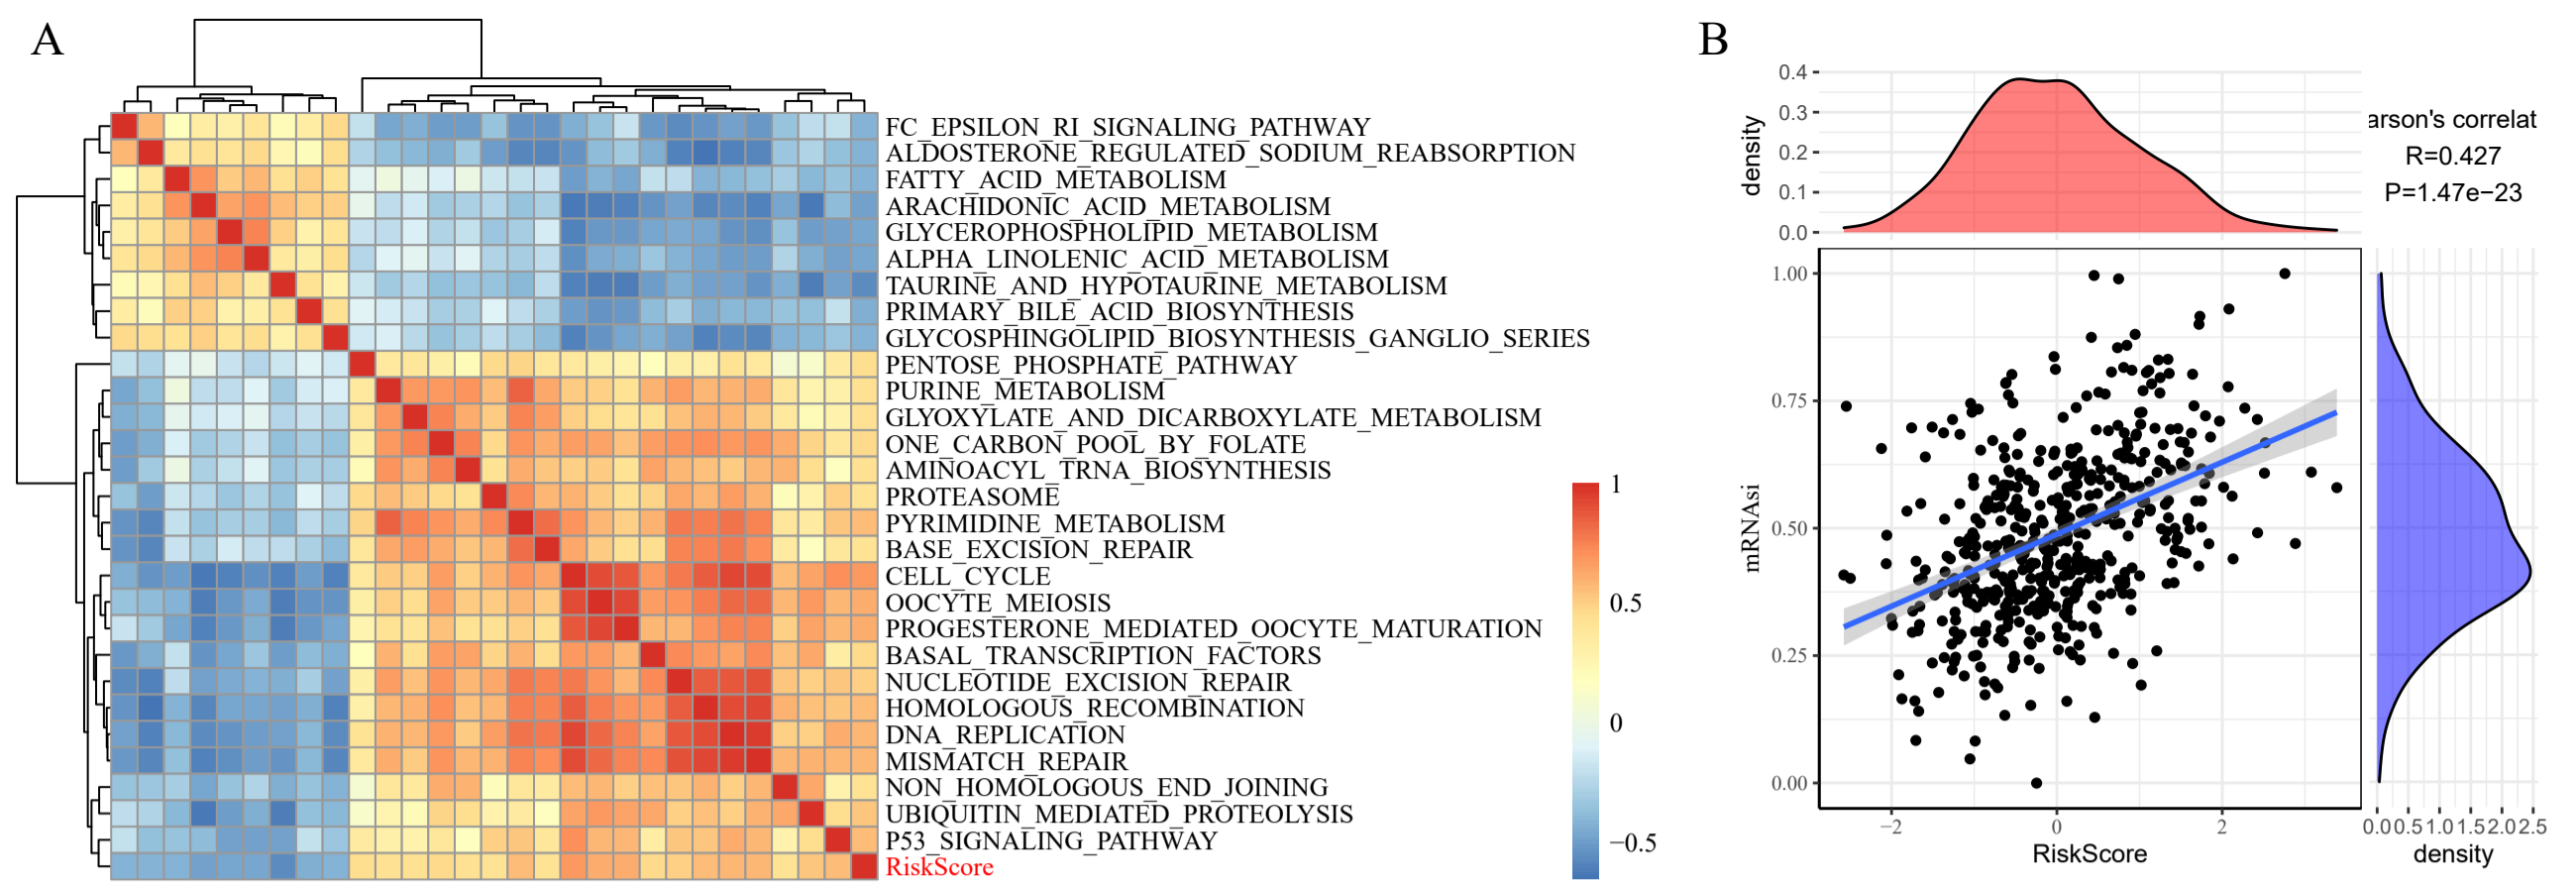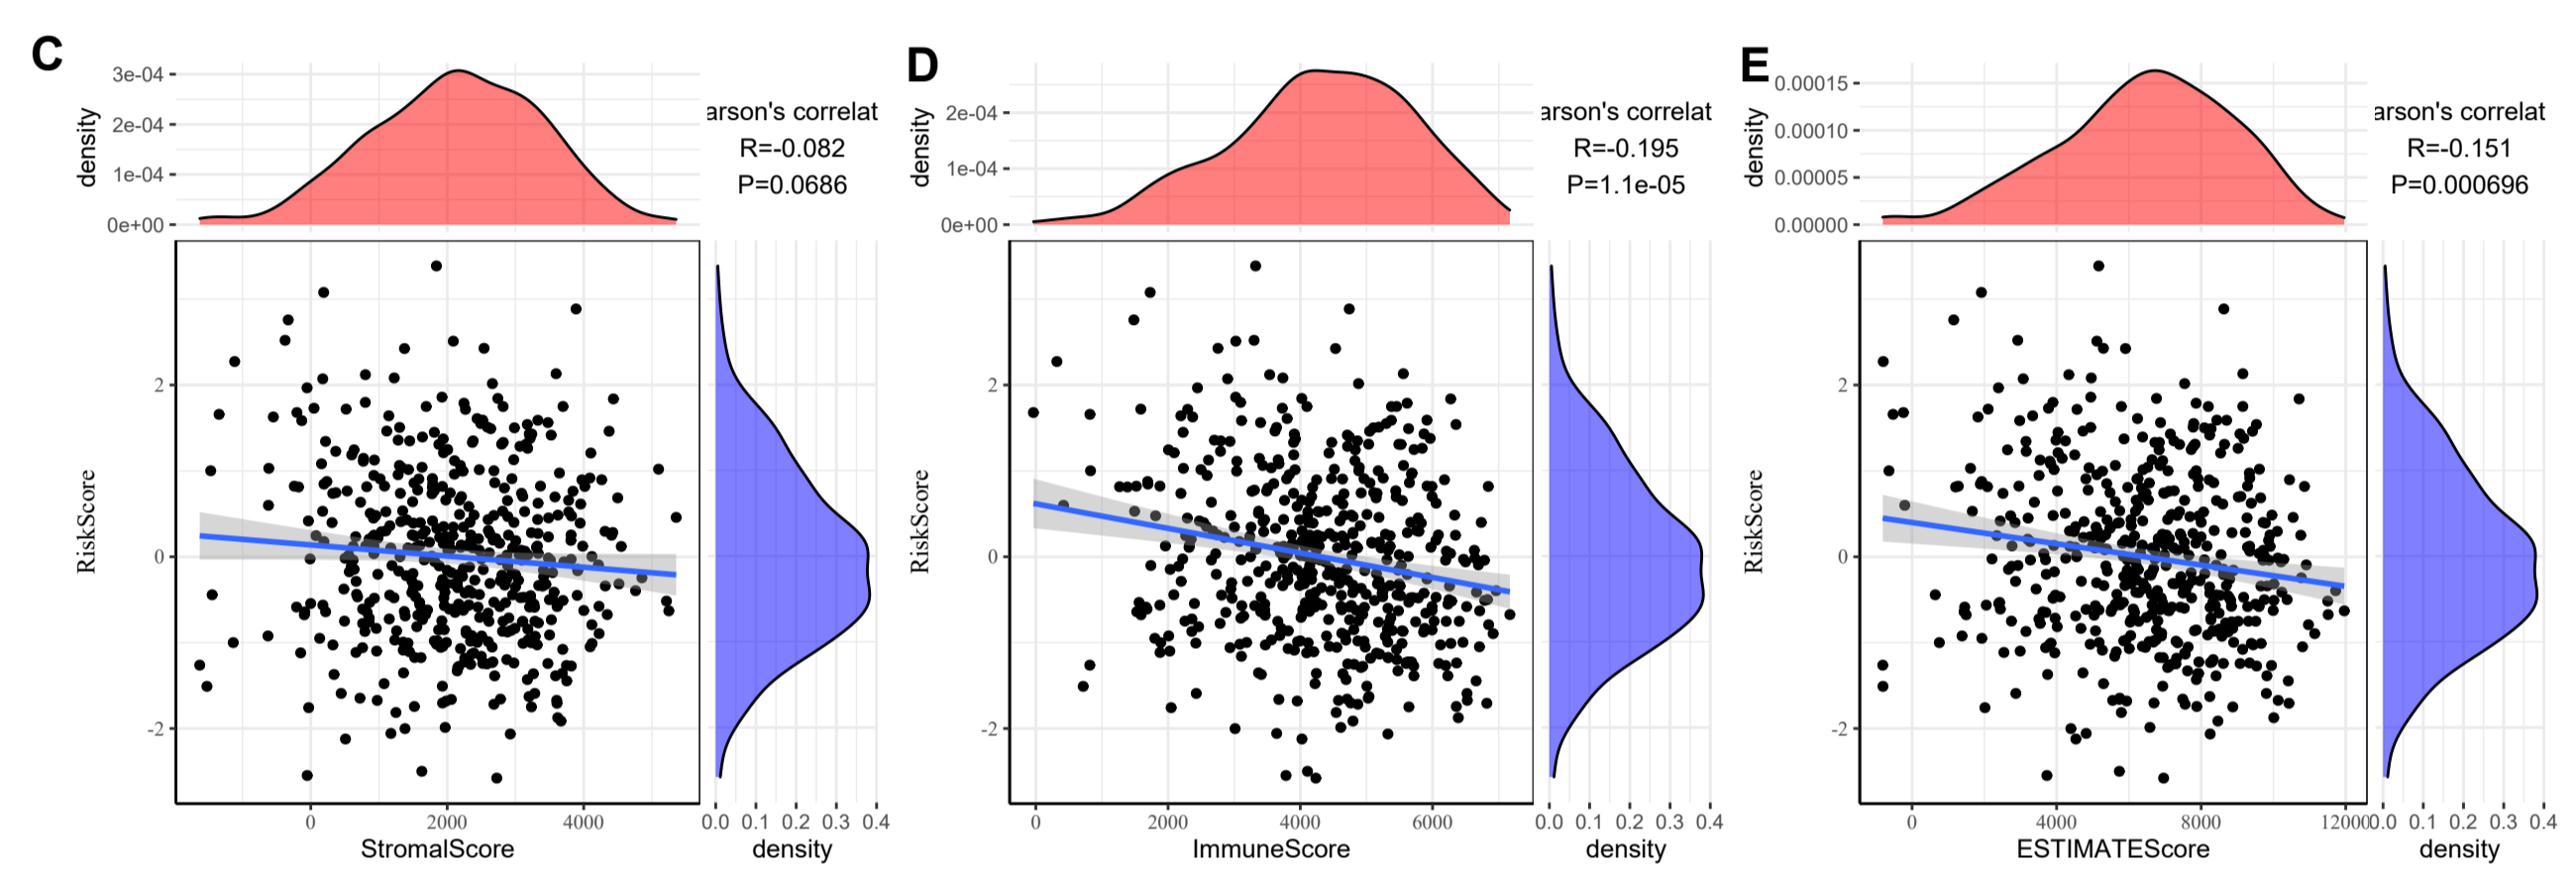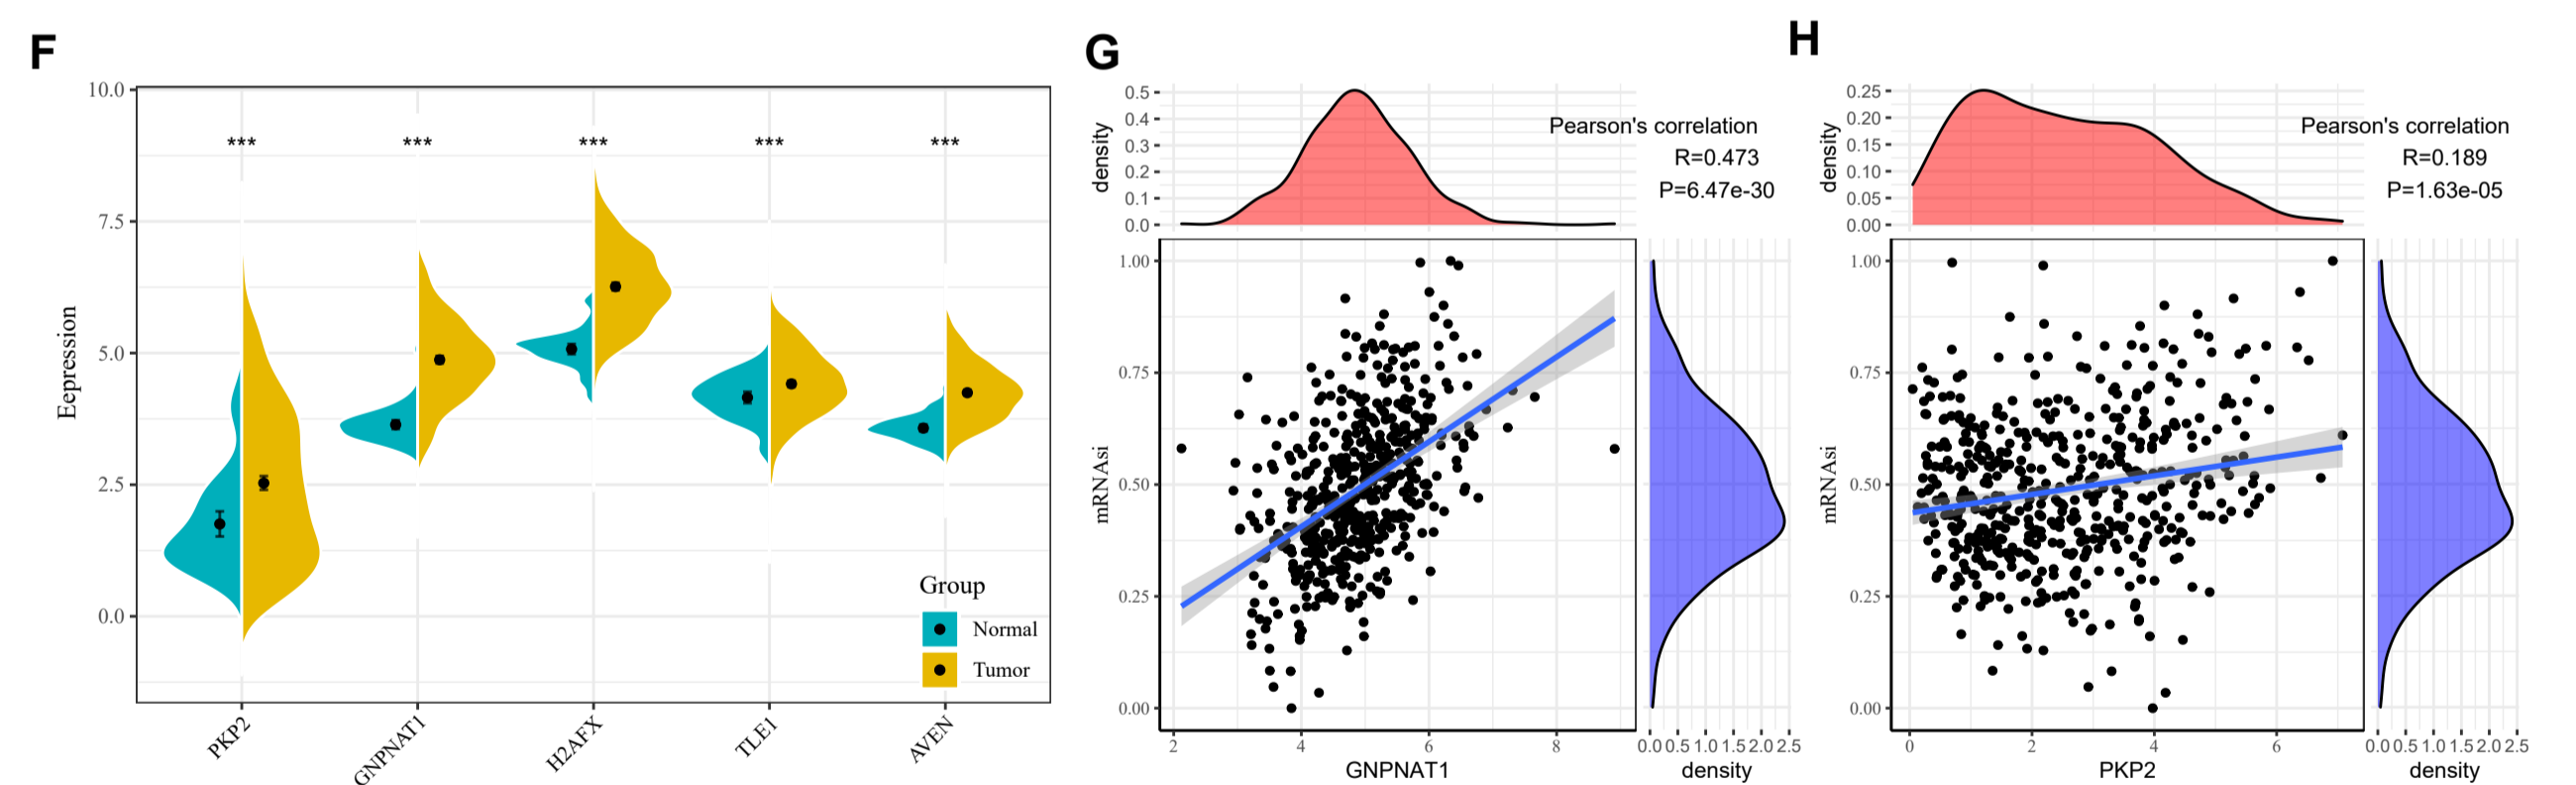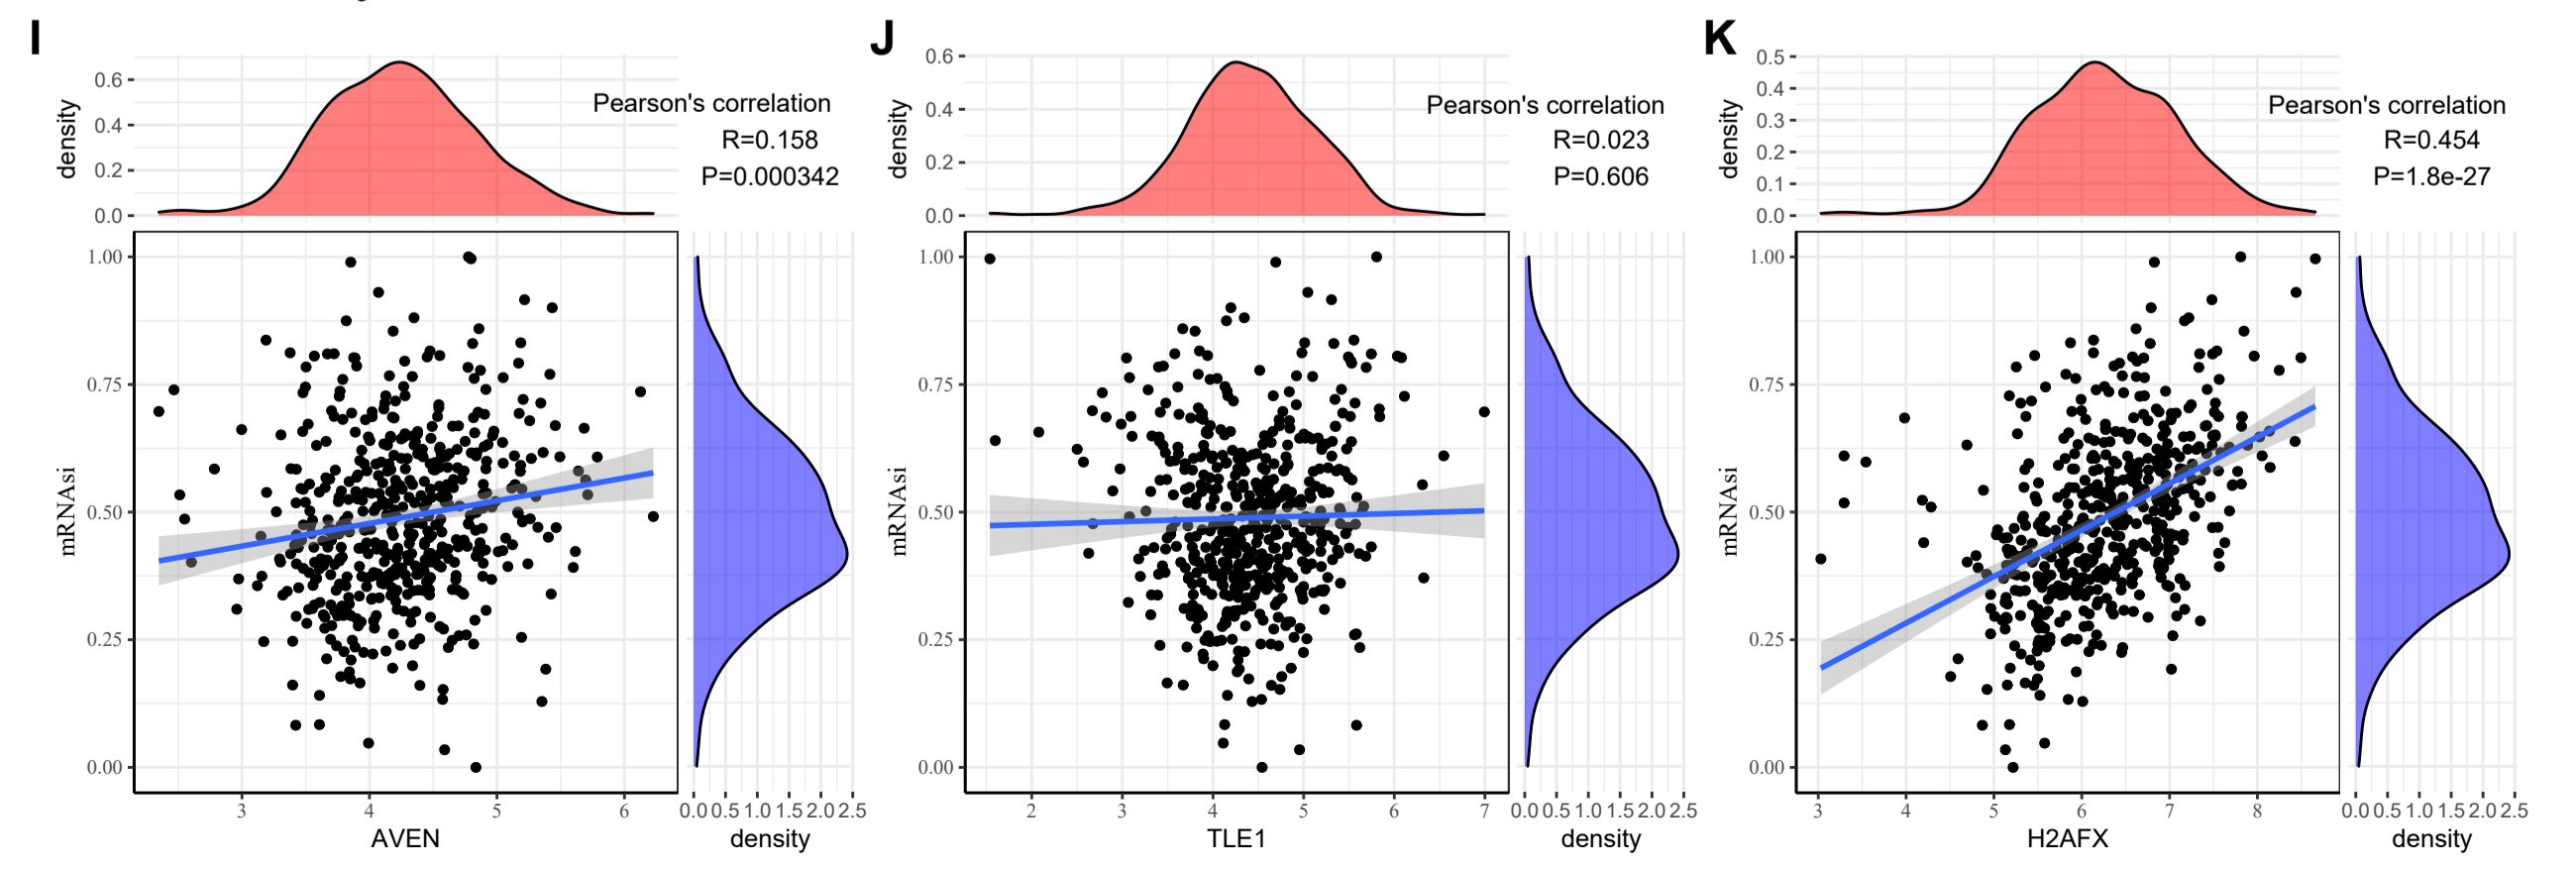

Supplement: f3 [file 4404406.f3.pdf]
